# Supplementary material
Source: PubMed Central journal article supplement (PMC9069077)
Supplement: mmc1.pdf [file mmc1.pdf]

**The American Journal of Human Genetics, Volume 109**

**Supplemental information**

**The genomic signatures of natural selection  
in admixed human populations**

**Sebastian Cuadros-Espinoza, Guillaume Laval, Lluís Quintana-Murci, and Etienne Patin**

## Supplementary Figures

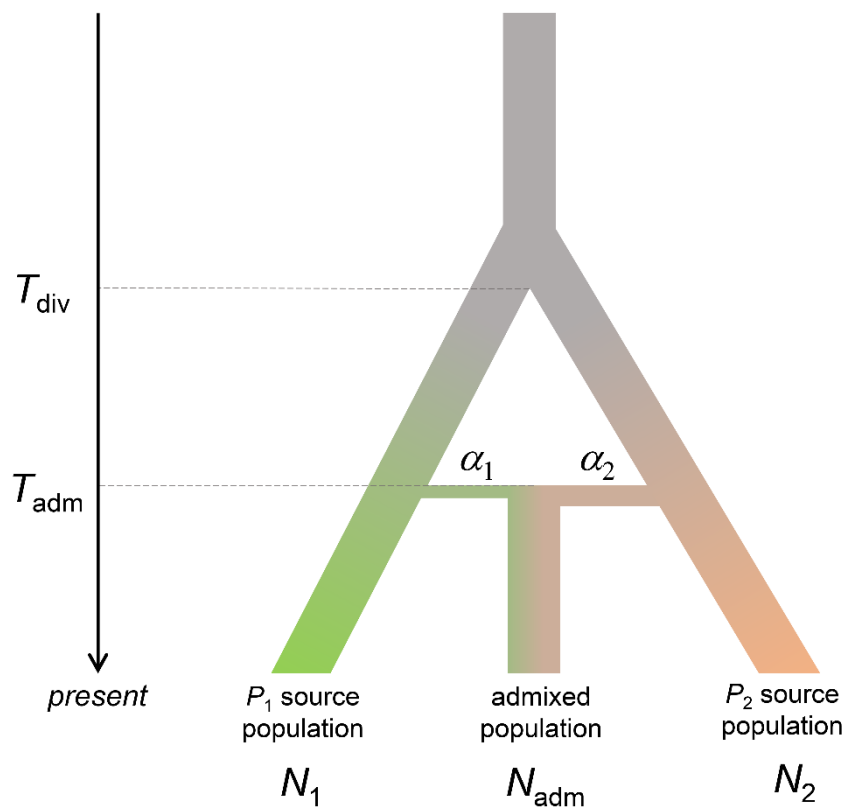

**Figure S1. The simulated single-pulse admixture model.**

The admixed population originates from admixture between two source populations, referred to as  $P_1$  and  $P_2$ .  $P_1$  and  $P_2$  contribute  $\alpha_1$  and  $\alpha_2$  admixture proportions to the admixed population, with  $\alpha_1 + \alpha_2 = 1$ .  $P_1$  and  $P_2$  diverge  $T_{\text{div}}$  generations ago and the admixture event occurs  $T_{\text{adm}}$  generations ago. The population sizes of the admixed population and of  $P_1$  and  $P_2$  source populations are  $N_{\text{adm}}$ ,  $N_1$  and  $N_2$ , respectively.

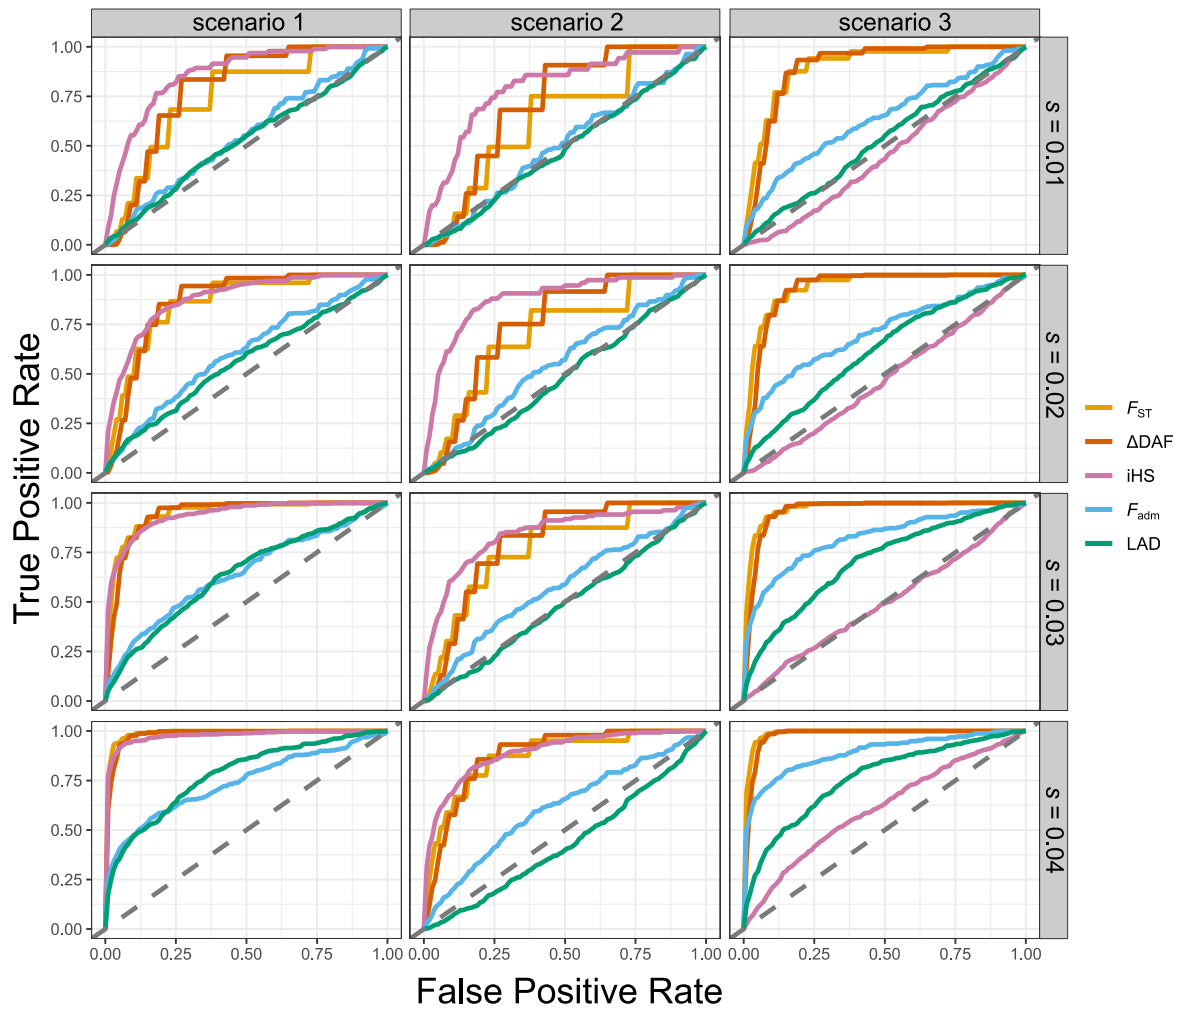

**Figure S2. Performance of neutrality statistics under different scenarios of admixture with selection, assuming different selection coefficients.**

Receiver operating characteristic (ROC) curves comparing the performance of the classic neutrality statistics  $F_{ST}$ ,  $\Delta DAF$  and  $iHS$  and the admixture-specific statistics  $F_{adm}$  and  $LAD$ , across the 3 explored admixture with selection scenarios, with varying selection coefficients  $s \in \{0.01, 0.02, 0.03, 0.04\}$ .

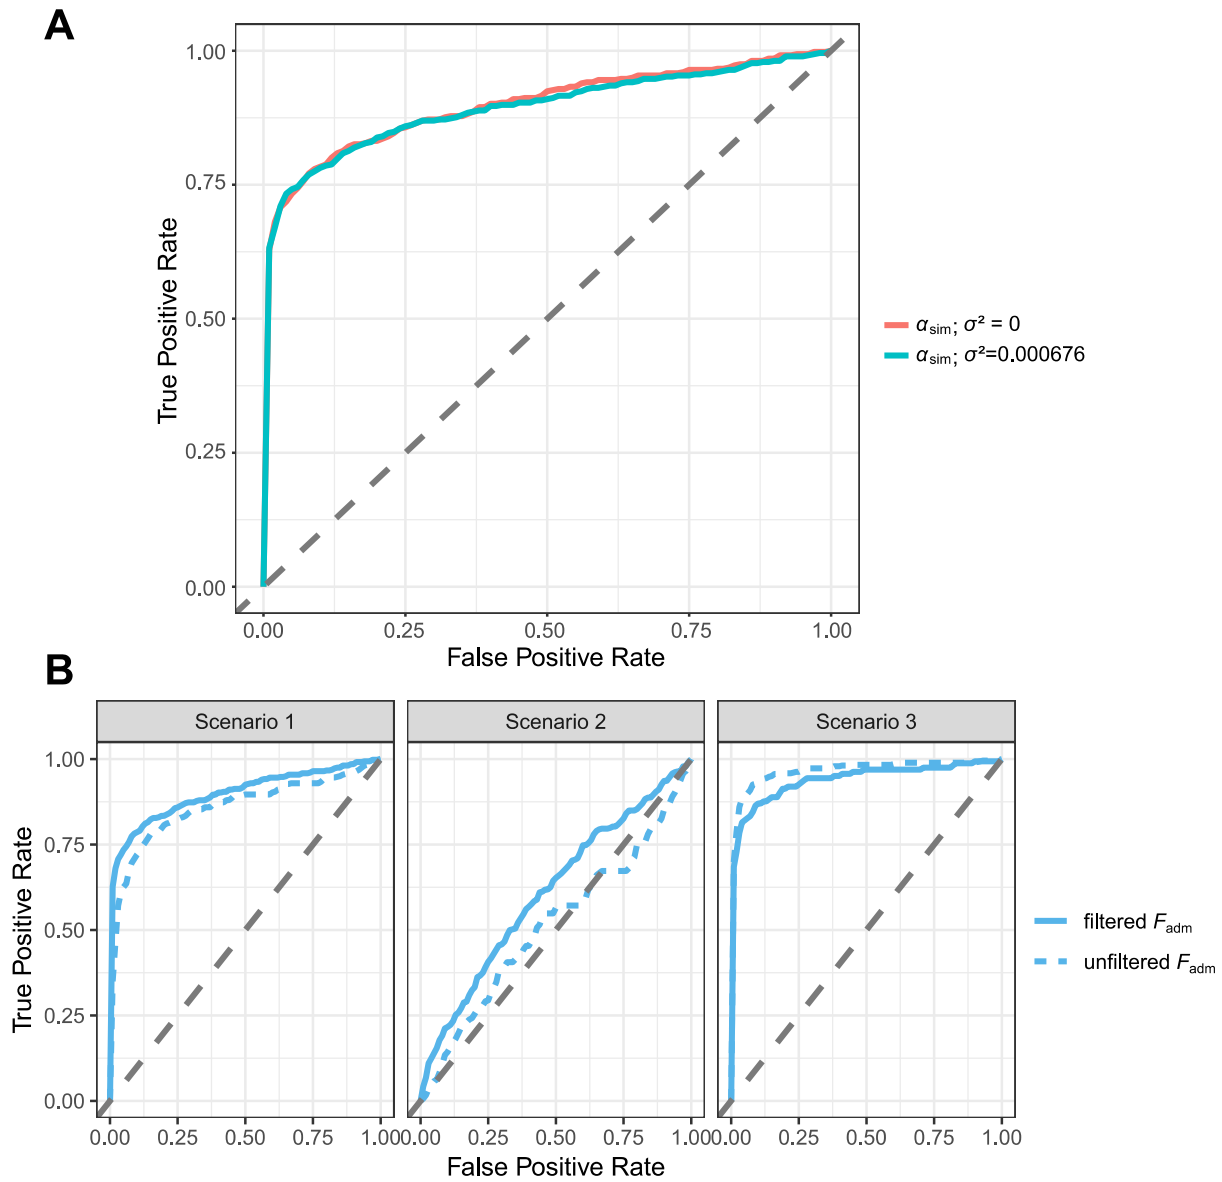

**Figure S3. Performance of  $F_{\text{adm}}$  when using simulated admixture proportions with error and when applying or not an allele frequency filter.**

(A) Receiver operating characteristic (ROC) curves comparing the performance of  $F_{\text{adm}}$  when using the simulated admixture proportions  $\alpha_{\text{sim}}$  or  $\alpha$  sampled from a normal distribution  $\mathcal{N}(\mu = \alpha_{\text{sim}}, \sigma^2 = 0.026^2 = 0.000676)$ , 0.026 being the highest root-mean-square deviation of the ADMIXTURE estimation.<sup>54</sup>

(B) Receiver operating characteristic (ROC) curves comparing the performance of  $F_{\text{adm}}$ , with and without applying an allele frequency filter based on the source populations (see Material & Methods), under the 3 explored admixture with selection scenarios.

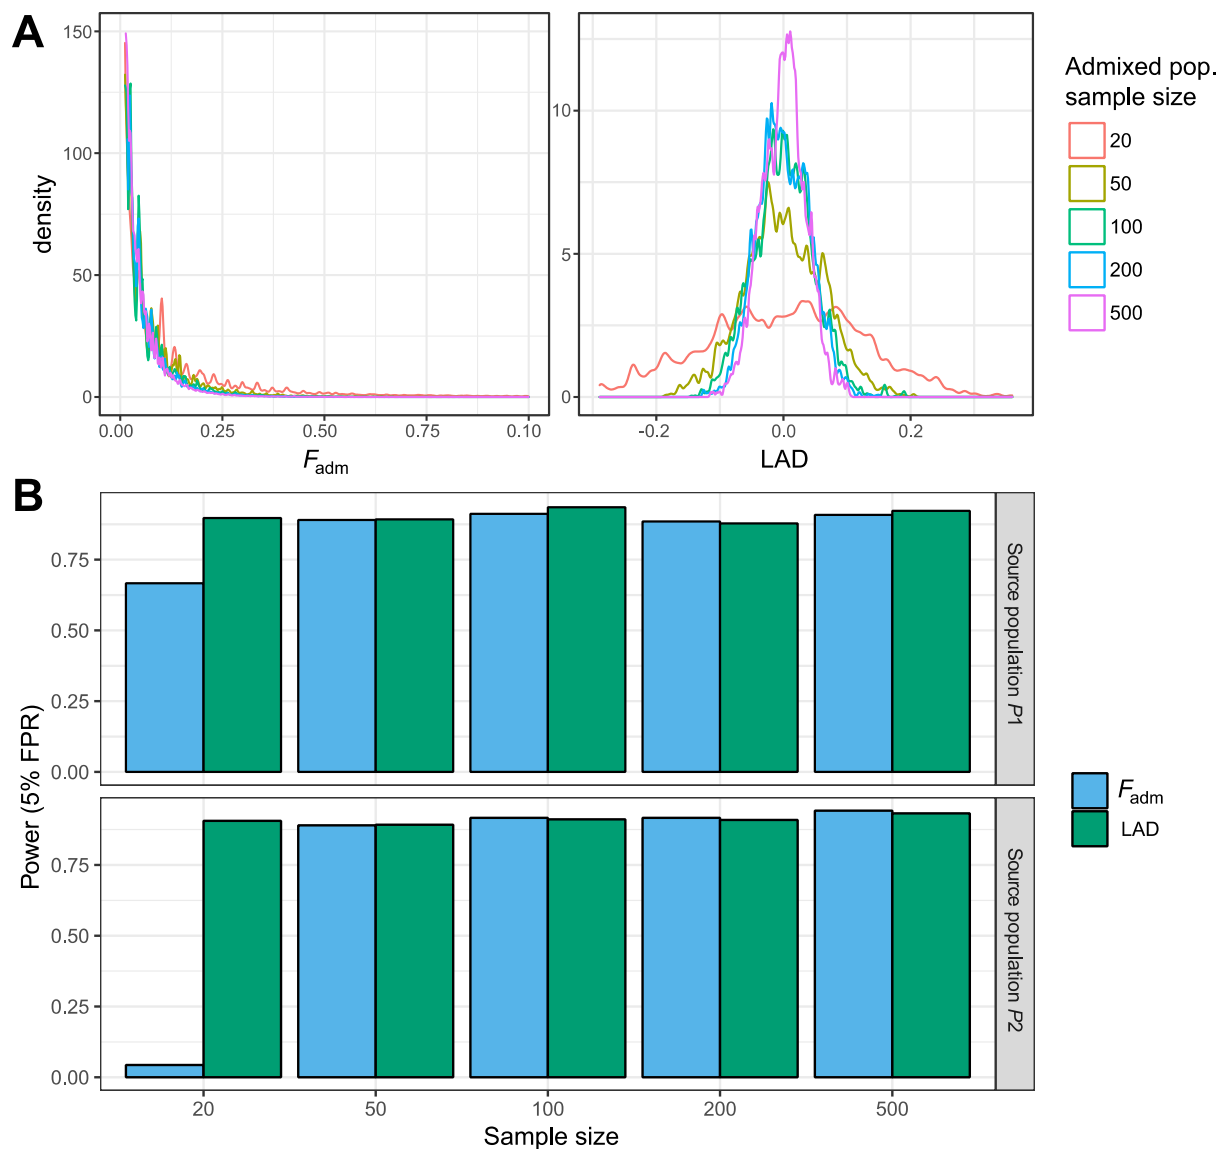

**Figure S4. Effects of sample size on the power of  $F_{adm}$  and LAD statistics.**

(A) Distributions under the null hypothesis (no positive selection) of  $F_{adm}$  and LAD, with varying sample sizes for the admixed population.

(B) Effect of the sample size of the source populations on the detection power of  $F_{adm}$  and LAD.

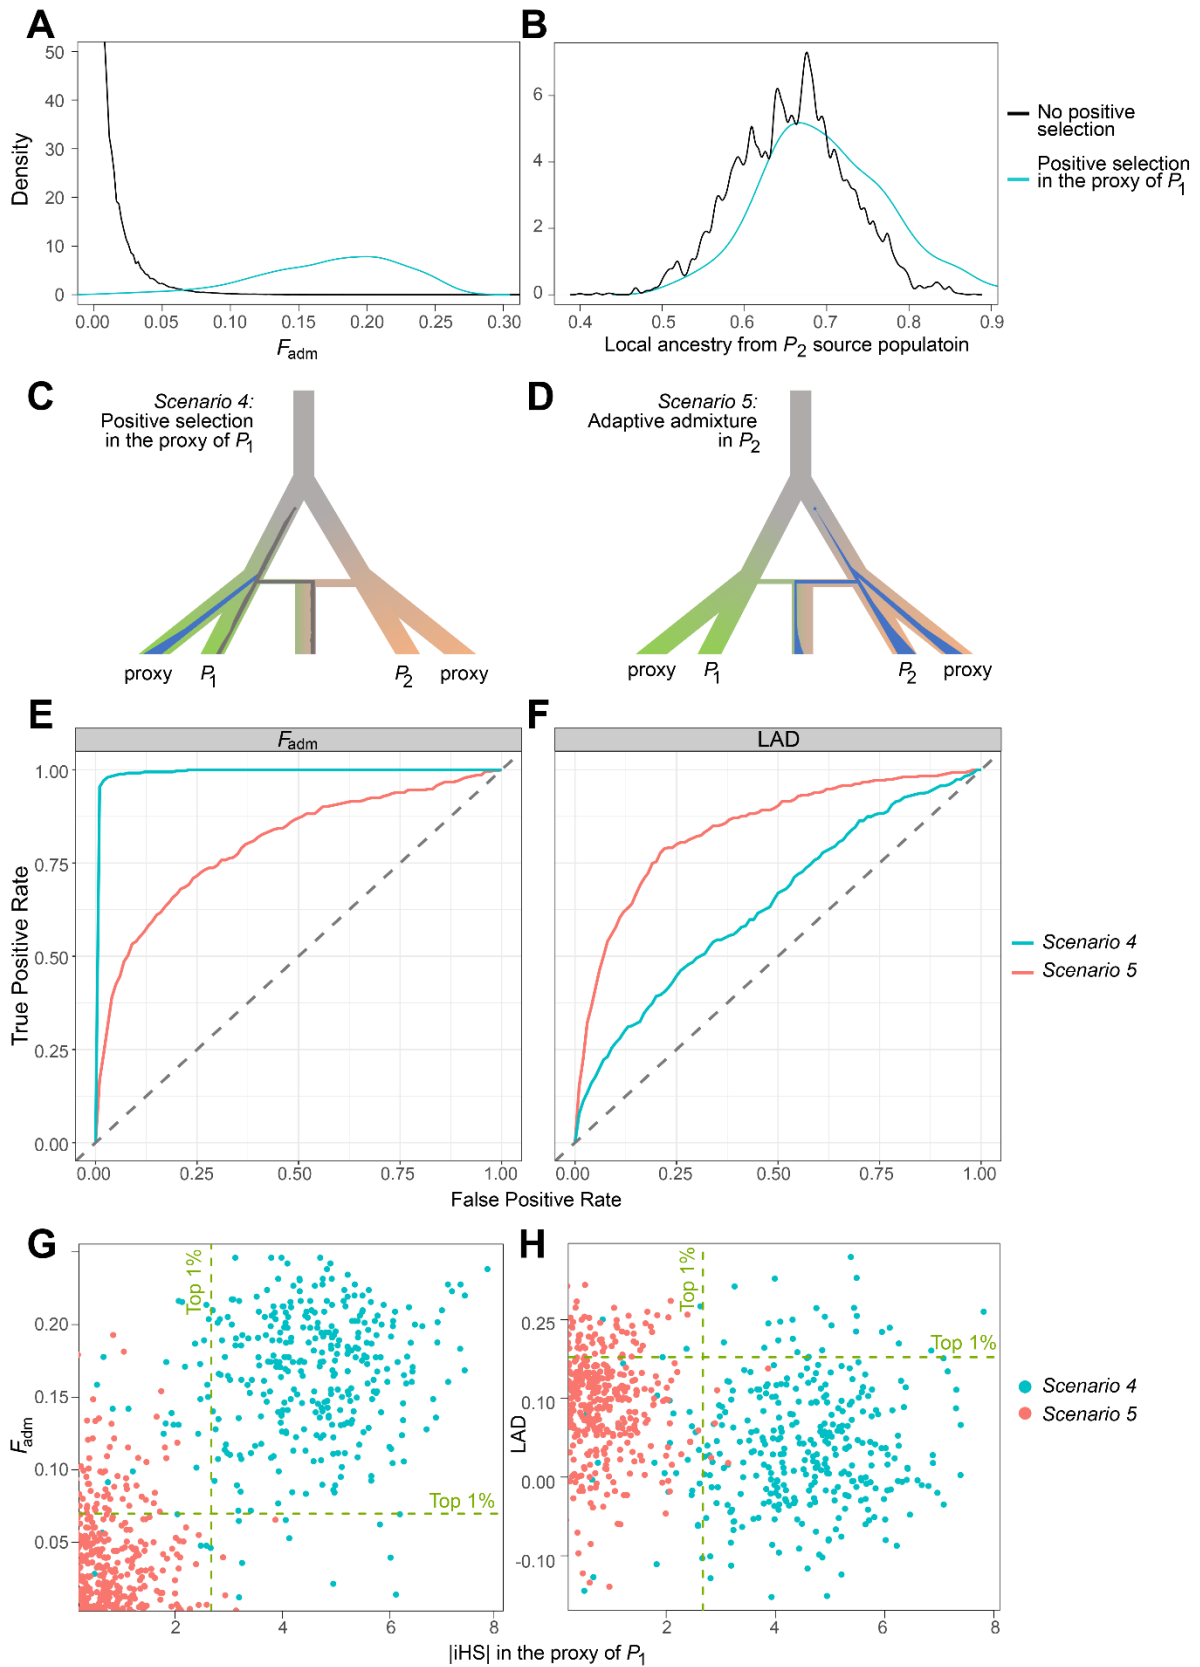

**Figure S5. False positive signals due to selection in the proxy source population.**

(A) Distributions of  $F_{adm}$  when there is or not positive selection in the proxy of the  $P_1$  source population.

(B) Distributions of local ancestry in the admixed population from the  $P_2$  source population, when there is or not positive selection in the proxy source population.

(C) The simulated model, assuming positive selection only in the proxy of the  $P_1$  source population.

(D) The simulated model, assuming adaptive admixture in the  $P_2$  source population. The scenario was simulated for comparison purposes.

(C-D) The blue and gray points indicate the appearance of a new beneficial and neutral mutations, respectively. The blue and gray areas indicate changes in frequency of the beneficial and neutral mutation, respectively.

(E-F) ROC curves for (E)  $F_{\text{adm}}$  and (F) LAD comparing the scenario where there is positive selection in the proxy of  $P_1$  only (*scenario 4*; Figure S5C) and the scenario where there is a adaptive admixture in  $P_2$  (*scenario 5*; Figure S5D).

(G–H) Absolute iHS values for the selected mutation in the proxy of the  $P_1$  source population vs. (G)  $F_{\text{adm}}$  and (H) LAD values in the admixed population, when there is selection in this proxy of  $P_1$  only (*scenario 4*; Figure S5C), or when there is adaptive admixture in  $P_2$  (*scenario 5*; Figure S5D). Dashed green lines represent the 99<sup>th</sup> percentiles (based on the null model simulations) for absolute iHS (vertical) and  $F_{\text{adm}}$  or LAD (horizontal). Excluding values that are above the absolute iHS 99<sup>th</sup> percentile excludes approximately 90% of the extreme  $F_{\text{adm}}$  and LAD values under selection in this proxy of  $P_1$  only (*scenario 4*) but, importantly, does not exclude any extreme value generated under the true adaptive admixture scenario (*scenario 5*).

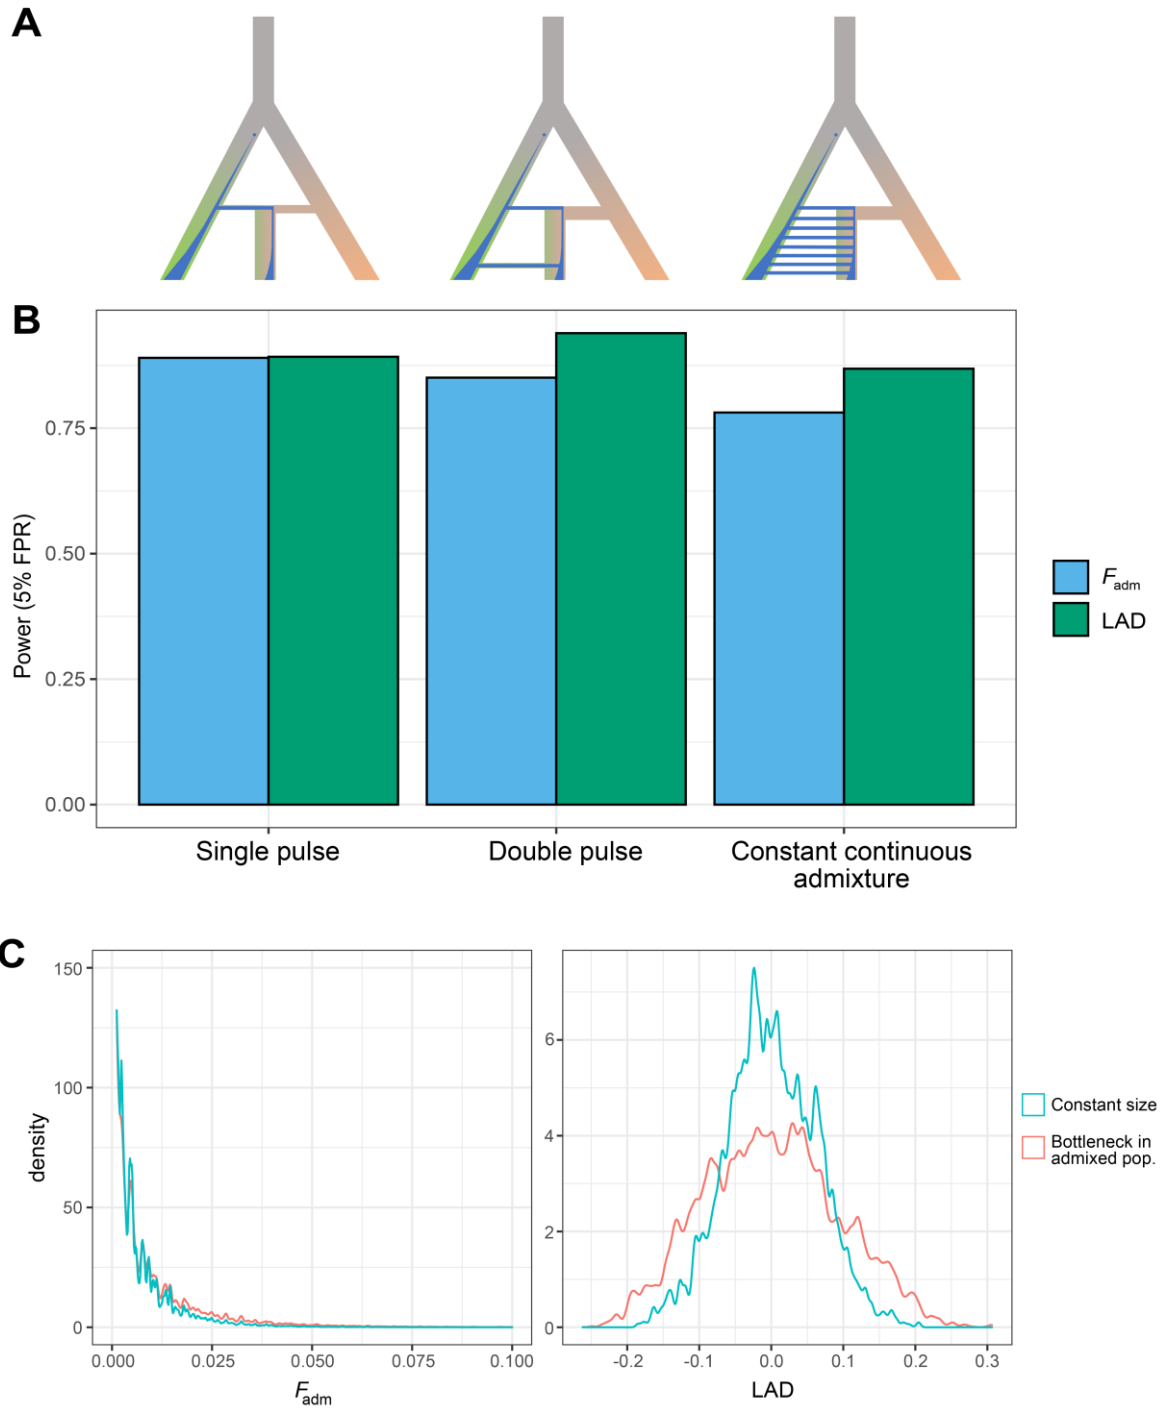

**Figure S6. Effects of complex admixture and non-stationary demography on the power to detect adaptive admixture.**

(A) The different simulated admixture models: a single pulse admixture model, a double pulse admixture model and a constant continuous admixture model. For these scenarios to be comparable, we set the sum of the admixture proportions contributed by each pulse to be equal to  $\alpha_1 = 35\%$ , and the average of the admixture dates to be equal to 70 generations (Material and Methods).



(B) Detection power of  $F_{\text{adm}}$  and LAD under the three different admixture scenarios (FPR = 5%; Material & Methods).

(C) Distributions of  $F_{\text{adm}}$  and LAD under the null hypothesis (no positive selection), with or without a 10-fold bottleneck in the admixed population.

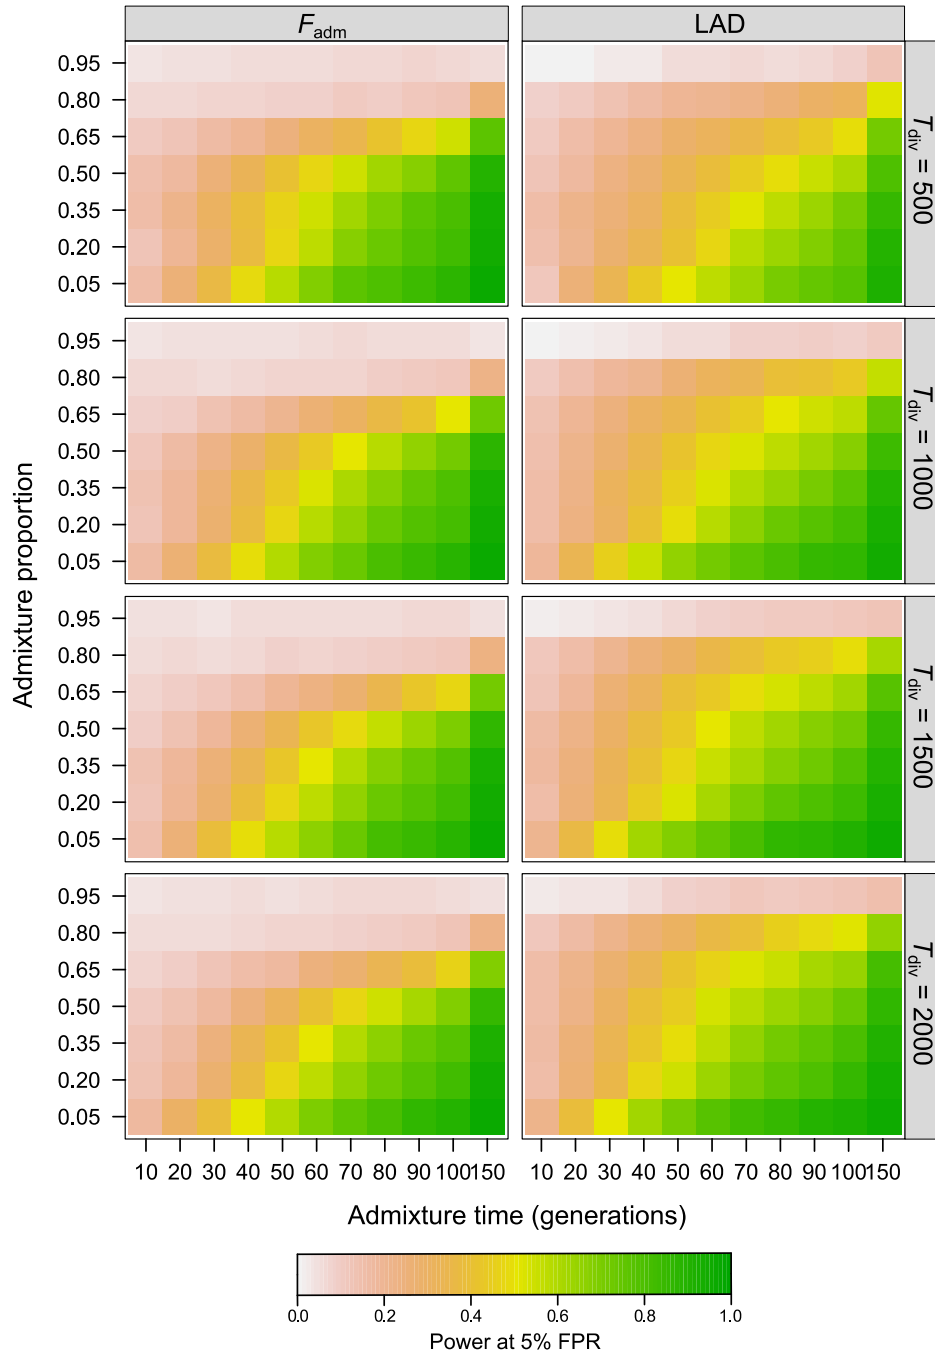

**Figure S7. Effects of the divergence time between source populations on the power to detect adaptive admixture.**

Effects on the detection power of  $F_{adm}$  and LAD of admixture time  $T_{adm}$ , admixture proportion  $\alpha$  and the divergence time between source populations  $T_{div}$ . Colour indicates average detection power for a FPR = 5% threshold, across combinations of the remaining parameters. Because  $T_{div}$  is the upper limit of the time at which the beneficial mutation appears  $T_{mut}$ , we assumed for these simulations  $T_{mut} < 500$  generations and  $s \in \{0.05; 0.10\}$ .

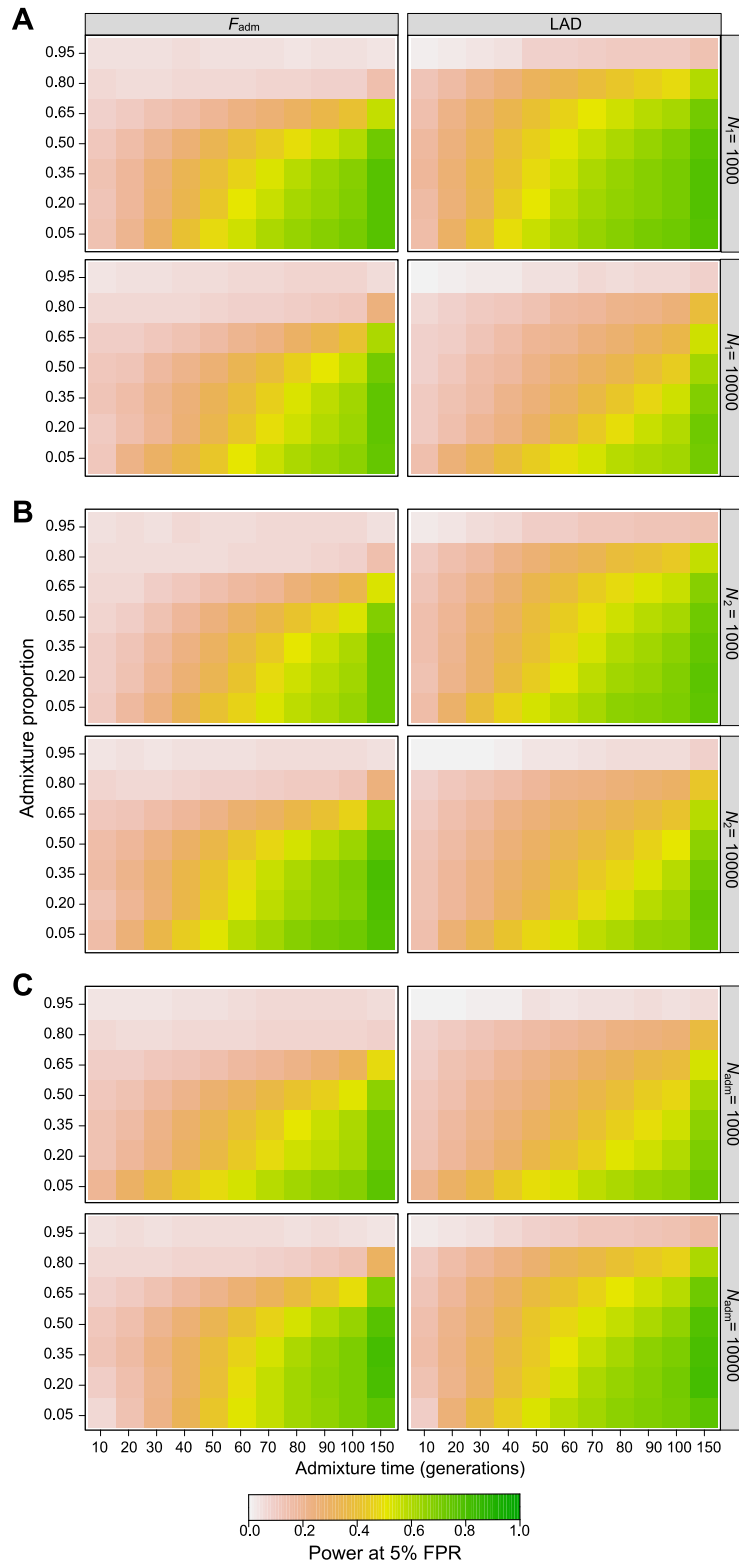

**Figure S8. Effects of population sizes on the power to detect adaptive admixture.**

Effects on the detection power of  $F_{adm}$  and LAD of admixture time  $T_{adm}$ , admixture proportion  $\alpha$  and (A)  $N_1$ , (B)  $N_2$  and (C)  $N_{adm}$ , the population sizes of source population  $P_1$ , source population  $P_2$  and the admixed population, respectively (Figure S1). Colour indicates average detection power for a FPR = 5% threshold, across combinations of the remaining parameters.

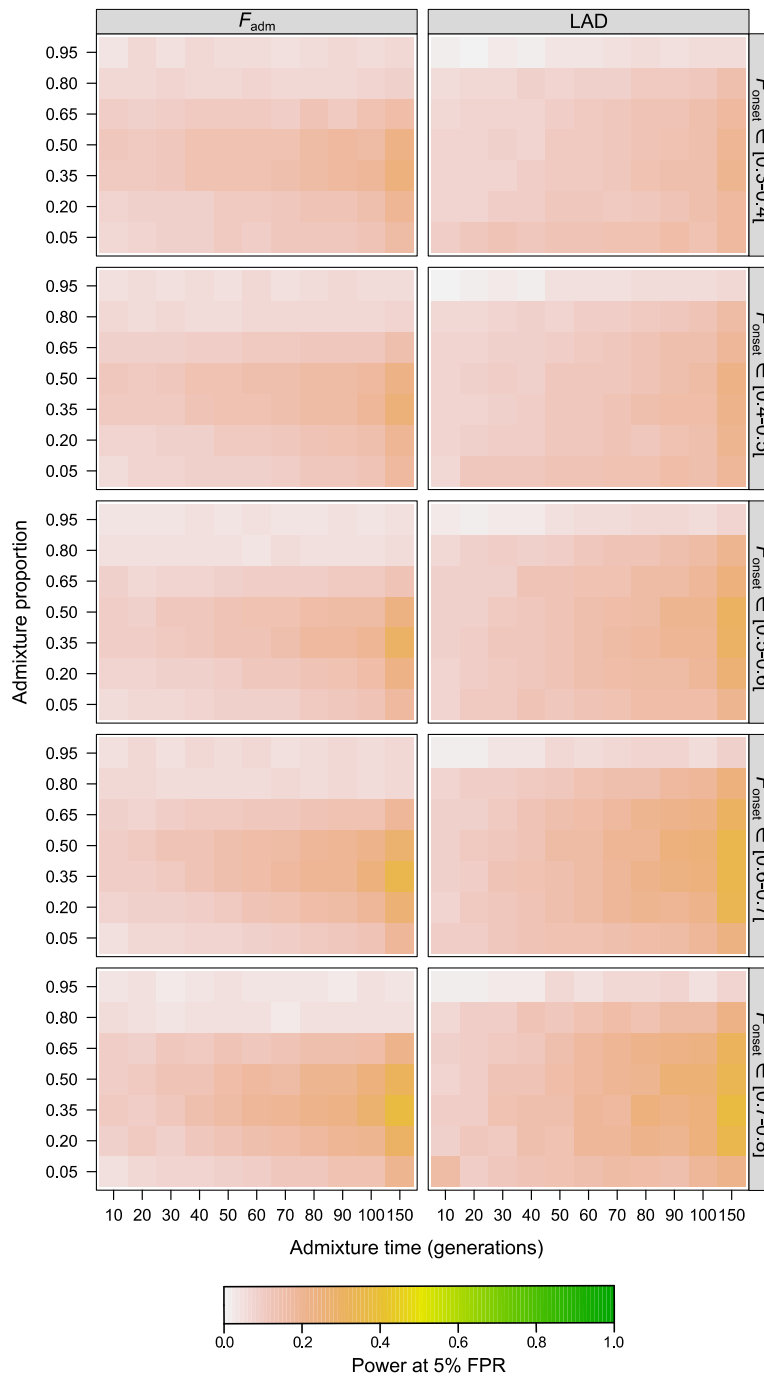

**Figure S9. Effects of the frequency of the beneficial mutation ( $s = 0.01$ ) on the power to detect adaptive admixture.**

Effects on the detection power of  $F_{adm}$  and LAD of admixture time  $T_{adm}$ , admixture proportion  $\alpha$  and  $F_{onset}$ , the frequency of the beneficial mutation in the source population at the time of admixture  $T_{adm}$ . Colour indicates average detection power for a FPR = 5% threshold, across combinations of the remaining parameters.

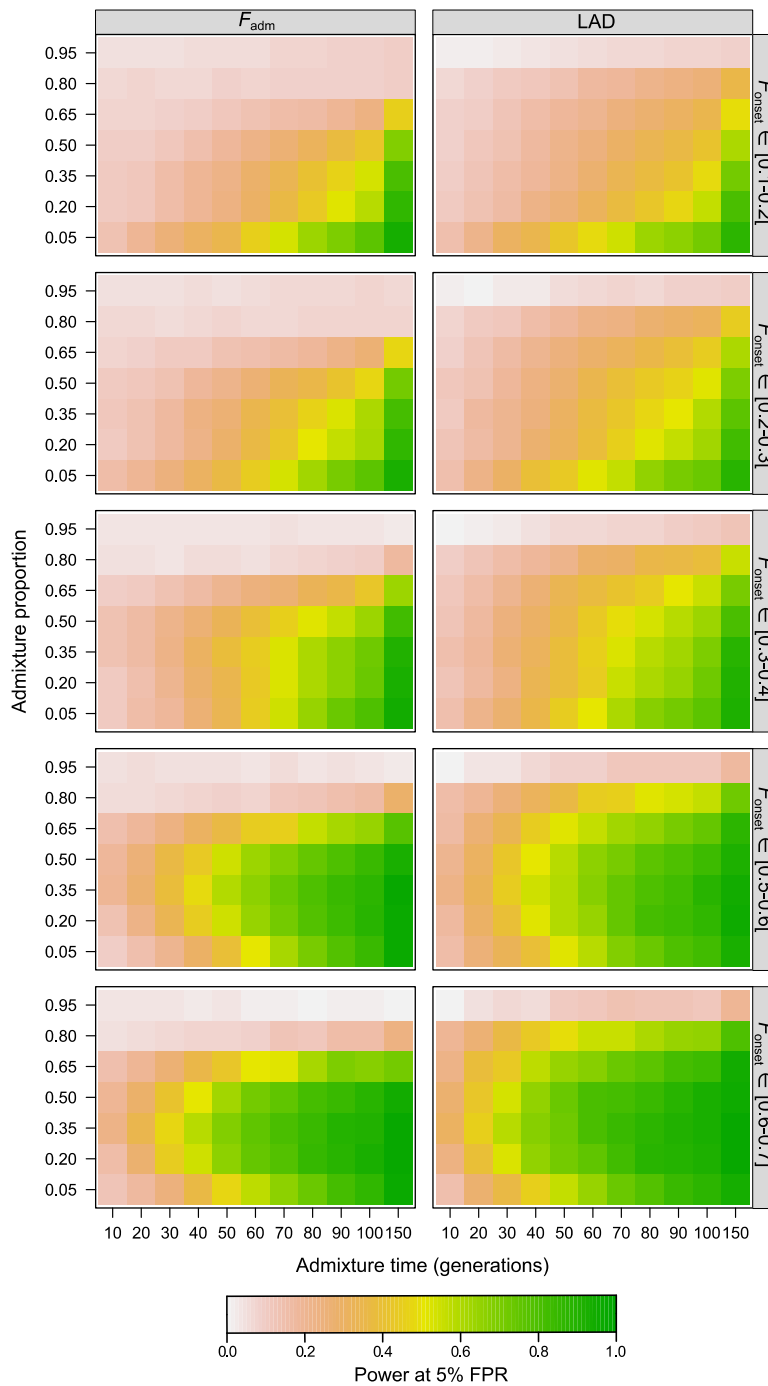

**Figure S10. Effects of the frequency of the beneficial mutation ( $s = 0.05$ ) on the power to detect adaptive admixture.**

Effects on the detection power of  $F_{adm}$  and LAD of admixture time  $T_{adm}$ , admixture proportion  $\alpha$  and  $F_{onset}$ , the frequency of the beneficial mutation in the source population at the time of admixture  $T_{adm}$ . Colour indicates average detection power for a FPR = 5% threshold, across combinations of the remaining parameters.

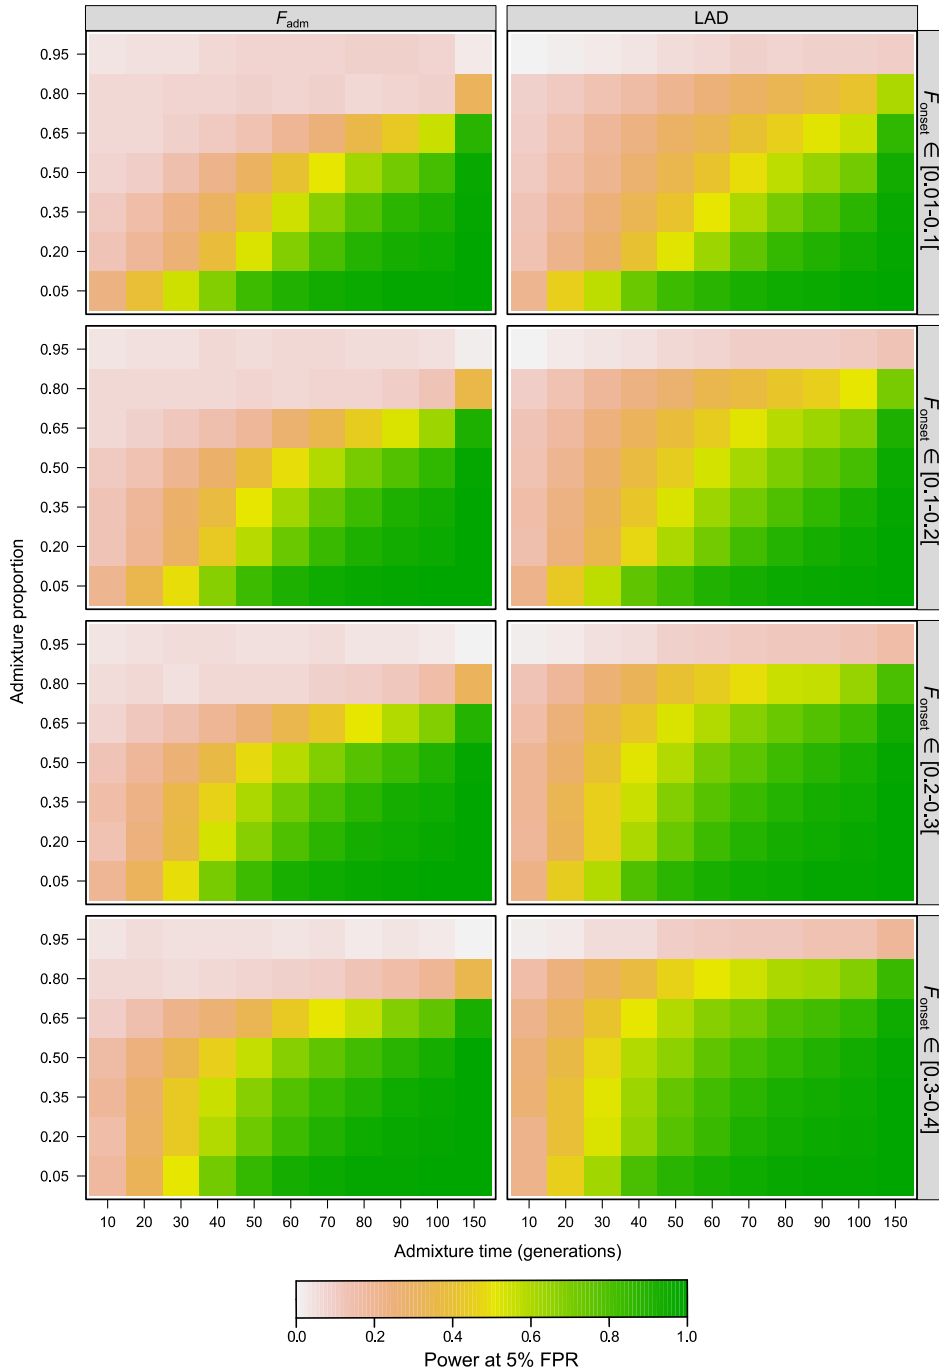

**Figure S11. Effects of the frequency of the beneficial mutation ( $s = 0.10$ ) on the power to detect adaptive admixture.**

Effects on the detection power of  $F_{adm}$  and LAD of admixture time  $T_{adm}$ , admixture proportion  $\alpha$  and  $F_{onset}$ , the frequency of the beneficial mutation in the source population at the time of admixture  $T_{adm}$ . Colour indicates average detection power for a FPR = 5% threshold, across combinations of the remaining parameters.

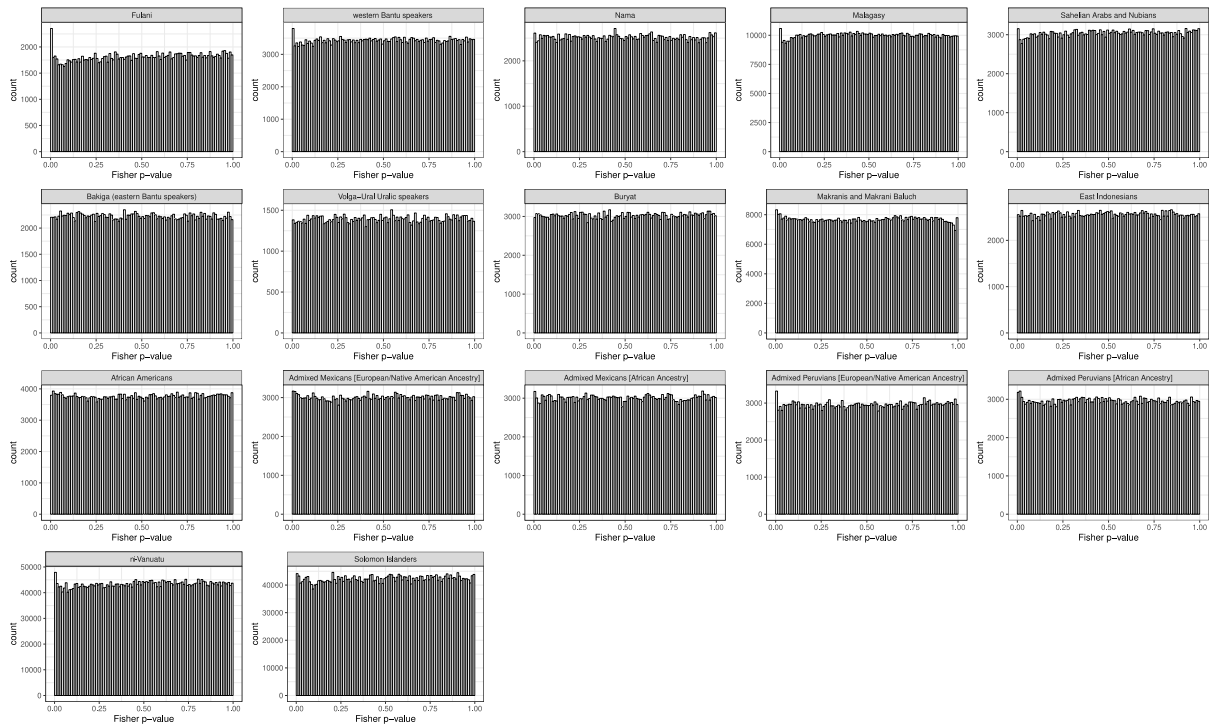

**Figure S12. Distributions of Fisher's combined  $P$ -values in the empirical data.**

Histograms of combined  $P$ -values using Fisher's method, for the 15 analysed admixed populations. The  $P$ -values are uniformly distributed, except for certain populations where there is an excess of small  $P$ -values, corresponding to the populations where signals for adaptive admixture were found.

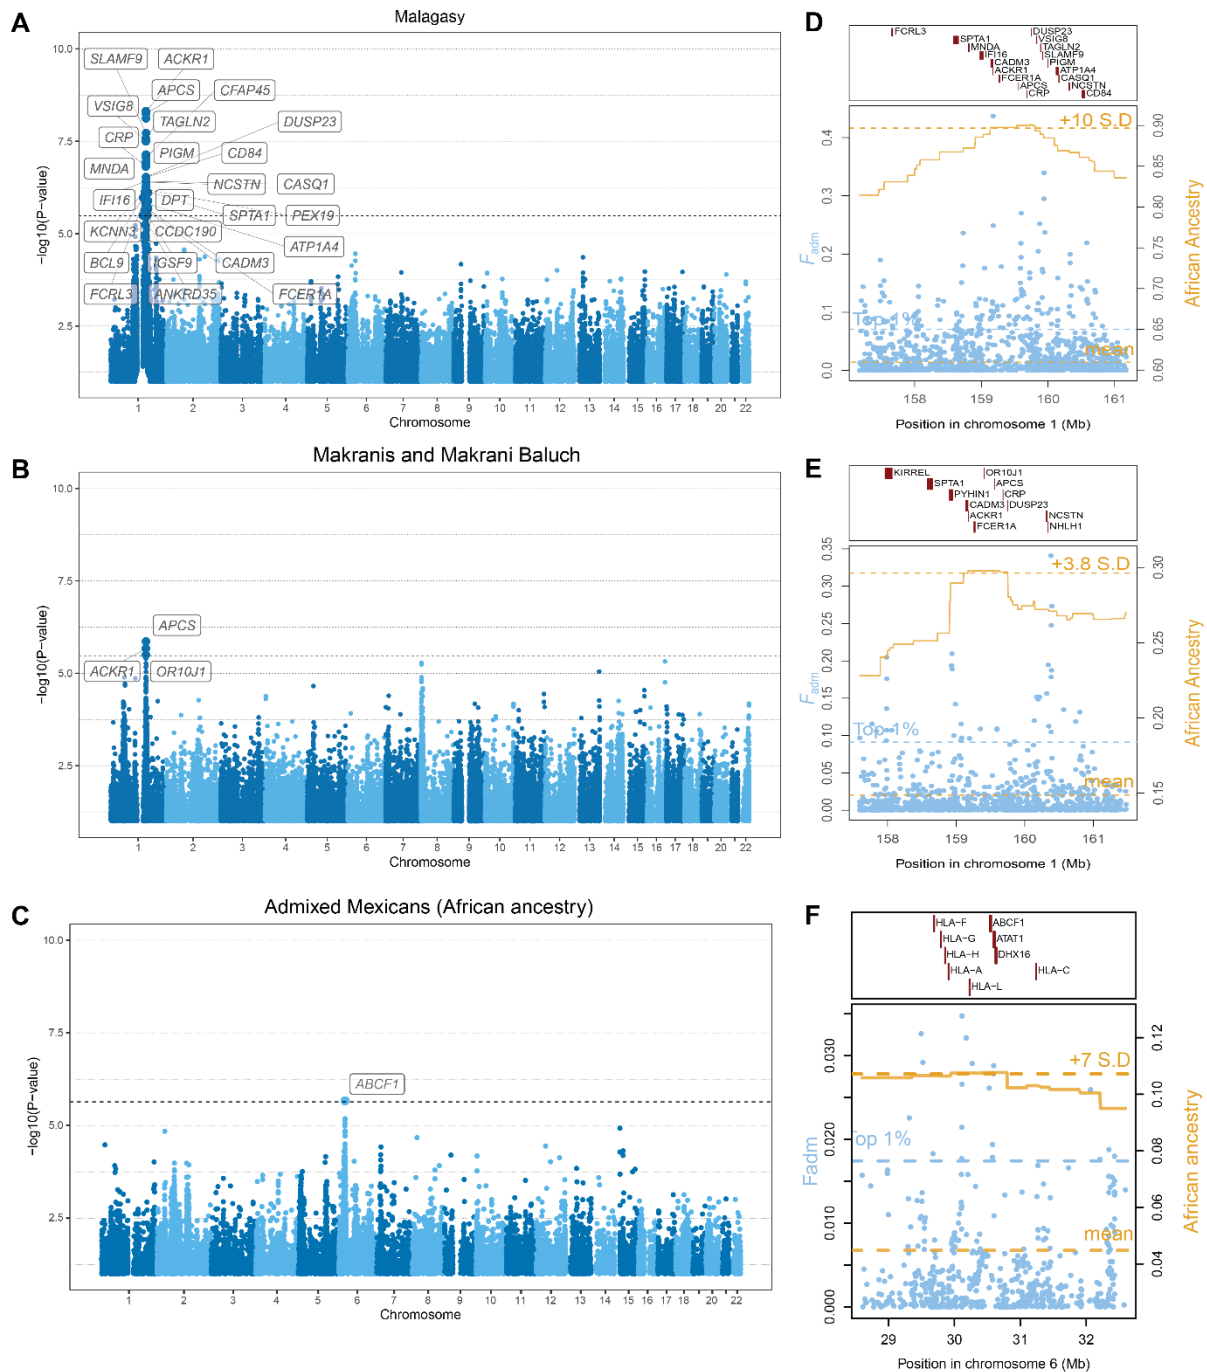

**Figure S13. Other previously reported genomic signals of adaptive admixture.**

(A) Genome-wide signals of adaptive admixture in Malagasy populations from Madagascar.

(B) Genome-wide signals of adaptive admixture in African-descent Makranis and Makrani Baluch from Pakistan.

(C) Genome-wide signals of adaptive admixture in admixed Mexicans (African ancestry).

(A-C) Highlighted blue points indicate variants that passed the Bonferroni significance threshold (shown by a horizontal dotted line). Gene labels were attributed based on the gene with the highest V2G score within 250-kb of the candidate variant.



(D) Local signatures of adaptive admixture for the *ACKR1* region in Malagasy from Madagascar.

(E) Local signatures of adaptive admixture for the *ACKR1* region in Makranis and Makrani Baluch from Pakistan.

(F) Local signatures of adaptive admixture for the *HLA* class I region in admixed Mexicans.

(D-F) Light blue points indicate  $F_{\text{adm}}$  values for individual variants. The gold solid line indicates the average African local ancestry.

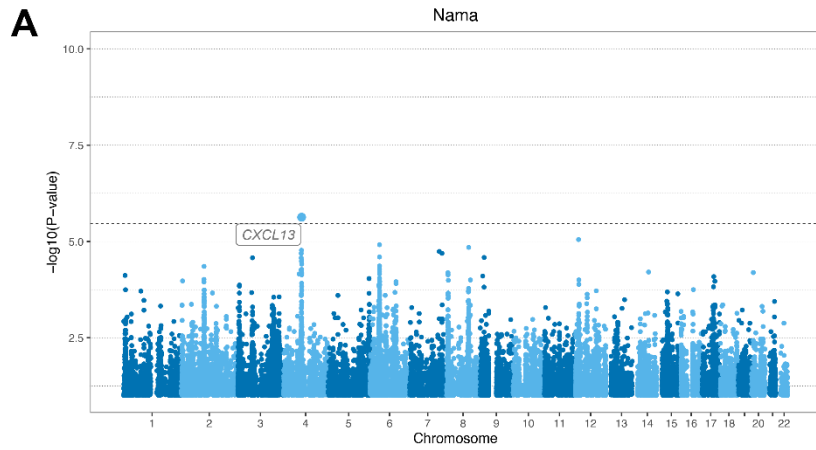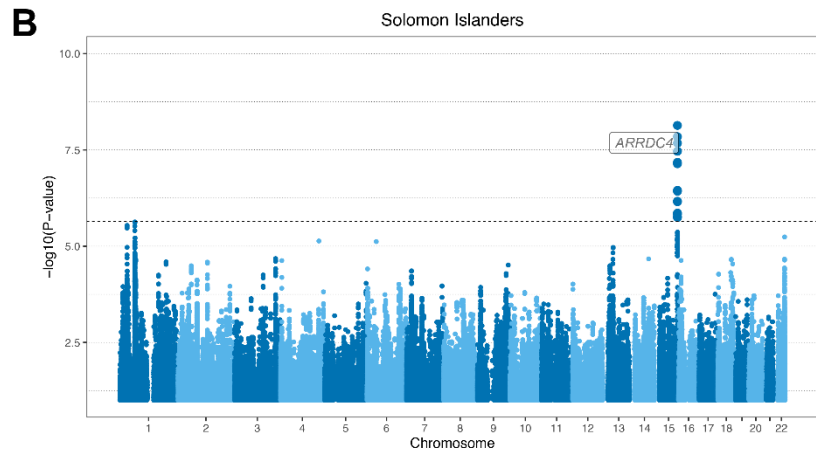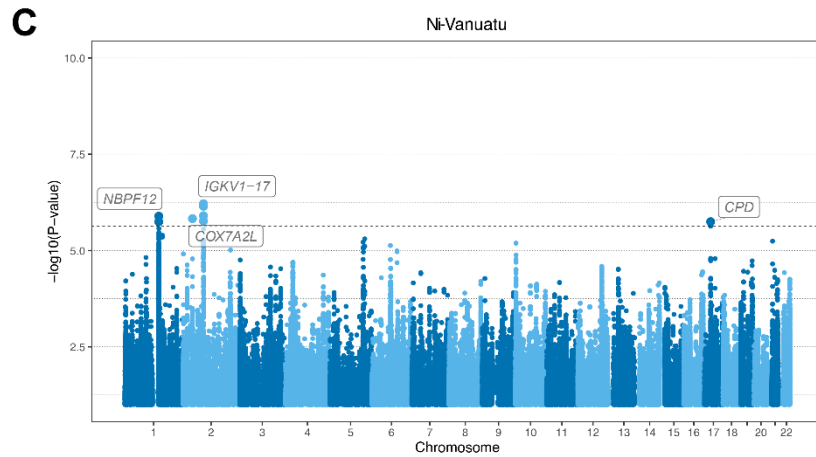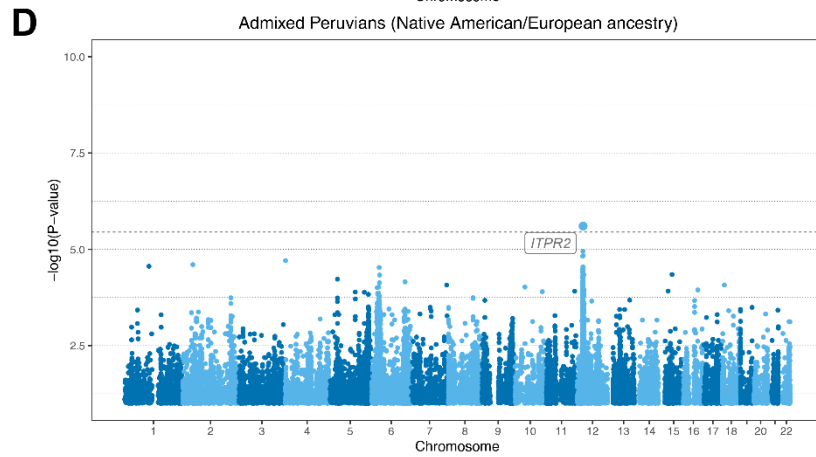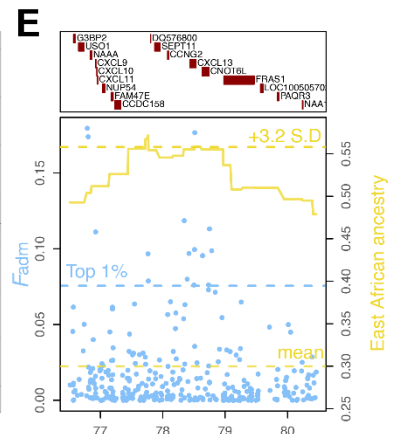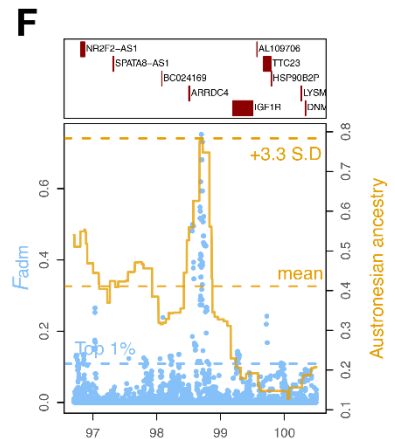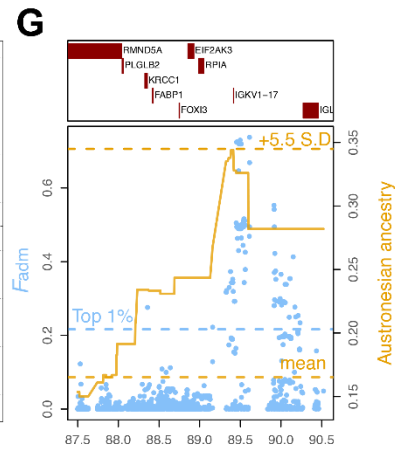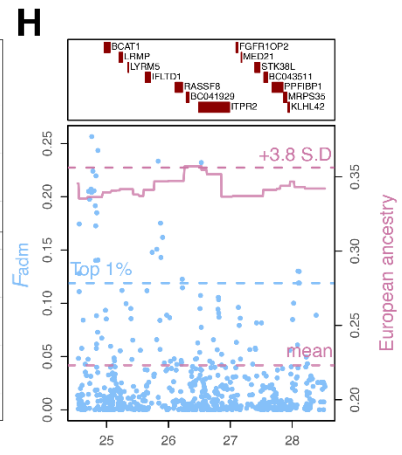

**Figure S14. Other novel genomic signals of adaptive admixture.**

(A) Genome-wide signals of adaptive admixture in the Nama from South Africa.

(B) Genome-wide signals of adaptive admixture in Solomon Islanders.

(C) Genome-wide signals of adaptive admixture in Vanuatu Islanders.

(D) Genome-wide signals of adaptive admixture in admixed Peruvians.

(A-D) Highlighted blue points indicate variants that passed the Bonferroni significance threshold (shown by a horizontal dotted line). Gene labels were attributed based on the gene with the highest V2G score within 250-kb of the candidate variant.

(E) Local signatures of adaptive admixture for the *CNOT6L/CXCL13* region in the Nama from South Africa.

(F) Local signatures of adaptive admixture for the *ARRDC4* region in Solomon Islanders.

(G) Local signatures of adaptive admixture for the *IGKV1-17* region in Vanuatu Islanders.

(H) Local signatures of adaptive admixture for the *ITPR2* region in admixed Peruvians.

(E-H) Light blue points indicate  $F_{adm}$  values for individual variants. The yellow, gold and pink solid lines indicate average local ancestry from East Africans, Austronesians and Europeans respectively.

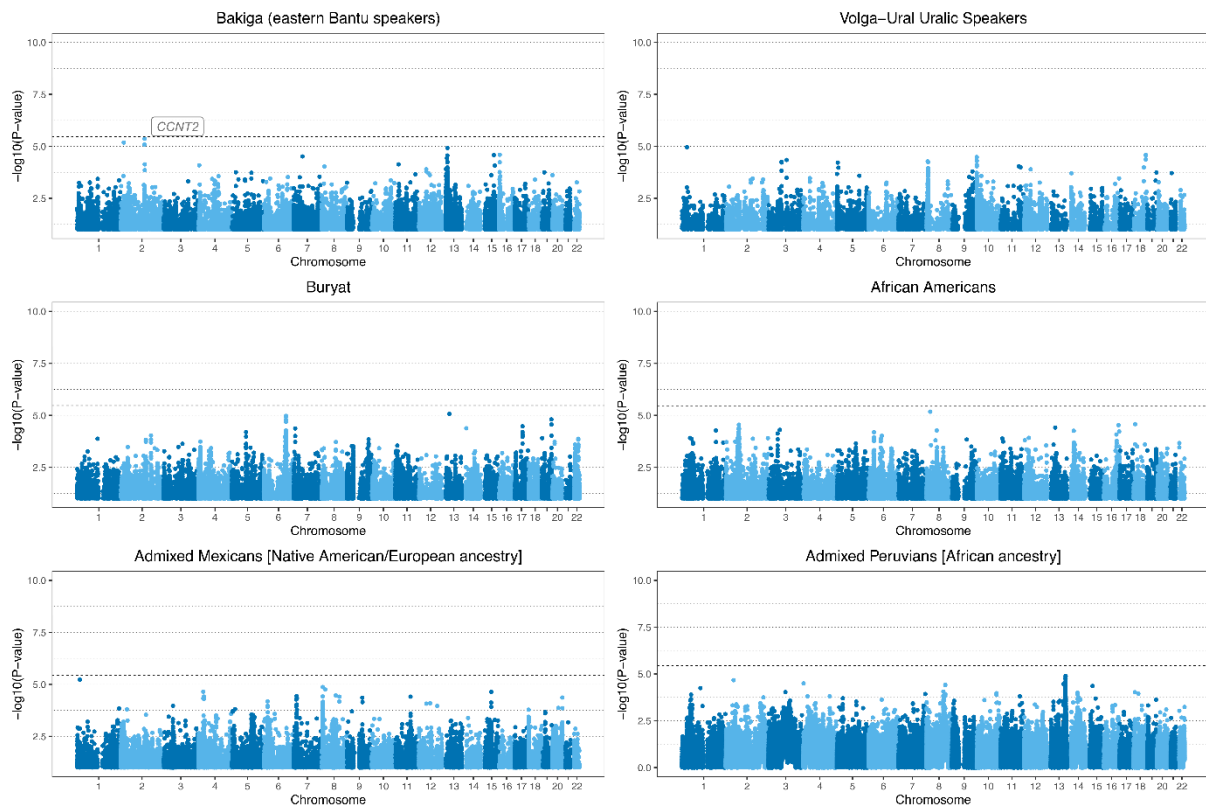

**Figure S15. Genome scans for populations where there is no evidence for adaptive admixture.**

Manhattan plots of  $-\log_{10}(P\text{-values})$  for the combined Fisher's method, in the remaining 6 admixed populations where no variant passes the Bonferroni significance threshold (shown by a horizontal dotted line).
