# Supplementary material
Source: PubMed Central journal article supplement (PMC9069077)
Supplement: mmc3.pdf [file mmc3.pdf]

# The genomic signatures of natural selection in admixed human populations

## Authors

Sebastian Cuadros-Espinoza, Guillaume Laval,  
Lluís Quintana-Murci, Etienne Patin

## Correspondence

[epatin@pasteur.fr](mailto:epatin@pasteur.fr) (E.P.),  
[quintana@pasteur.fr](mailto:quintana@pasteur.fr) (L.Q.-M.)

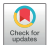

Cuadros-Espinoza et al., 2022, *The American Journal of Human Genetics* 109,  
710–726

April 7, 2022 © 2022 American Society of Human Genetics.  
<https://doi.org/10.1016/j.ajhg.2022.02.011>

# The genomic signatures of natural selection in admixed human populations

Sebastian Cuadros-Espinoza,<sup>1,2</sup> Guillaume Laval,<sup>1</sup> Lluís Quintana-Murci,<sup>1,3,\*</sup> and Etienne Patin<sup>1,\*</sup>

## Summary

Admixture has been a pervasive phenomenon in human history, extensively shaping the patterns of population genetic diversity. There is increasing evidence to suggest that admixture can also facilitate genetic adaptation to local environments, i.e., admixed populations acquire beneficial mutations from source populations, a process that we refer to as “adaptive admixture.” However, the role of adaptive admixture in human evolution and the power to detect it remain poorly characterized. Here, we use extensive computer simulations to evaluate the power of several neutrality statistics to detect natural selection in the admixed population, assuming multiple admixture scenarios. We show that statistics based on admixture proportions,  $F_{adm}$  and LAD, show high power to detect mutations that are beneficial in the admixed population, whereas other statistics, including  $iHS$  and  $F_{ST}$ , falsely detect neutral mutations that have been selected in the source populations only. By combining  $F_{adm}$  and LAD into a single, powerful statistic, we scanned the genomes of 15 worldwide, admixed populations for signatures of adaptive admixture. We confirm that lactase persistence and resistance to malaria have been under adaptive admixture in West Africans and in Malagasy, North Africans, and South Asians, respectively. Our approach also uncovers other cases of adaptive admixture, including *APOL1* in Fulani nomads and *PKN2* in East Indonesians, involved in resistance to infection and metabolism, respectively. Collectively, our study provides evidence that adaptive admixture has occurred in human populations whose genetic history is characterized by periods of isolation and spatial expansions resulting in increased gene flow.

## Introduction

Over the last two decades, the search for molecular signatures of natural selection in the human genome has played an integral part in understanding human evolution and population differences in disease risk.<sup>1–6</sup> Genome scans for local adaptation have shed light on the environmental pressures that populations have faced for the last 100,000 years, including reduced exposure to sunlight, altitude-related hypoxia, new nutritional resources, or exposure to local pathogens. Candidate genes for local genetic adaptation have been identified on the basis of expected signatures of positive selection, such as extended haplotype homozygosity or strong differences in allele frequencies between geographically diverse populations. In doing so, selection studies have implicitly assumed that advantageous variation occurred in a single population that has remained isolated from other populations since their separation. Yet, ancient and modern genomics studies have clearly demonstrated that the last millennia of human history have been characterized by large-scale spatial expansions followed by extensive gene flow.<sup>1,7,8</sup> These findings indicate that most human populations descend from admixture between formerly isolated groups, highlighting the need for detailed studies of the expected genomic signatures of natural selection in admixed populations.

Several studies have searched for evidence of genetic adaptation in admixed populations as a means to detect genes under positive selection in their ancestral sources prior to admixture.<sup>9–15</sup> These studies showed that admix-

ture can obscure signals of selective sweeps in the source populations and proposed approaches to alleviate this problem, such as local ancestry masking. Conversely, few studies have yet explored the patterns of diversity expected under admixture with selection as a means to detect genes under positive selection in the admixed population since admixture.<sup>16,17</sup> Studying the genomic signatures of “adaptive admixture,” that is, positive selection in the admixed population of an allele that was beneficial in one of its ancestral sources, could shed light on the role of gene flow in spreading beneficial alleles among populations<sup>18</sup> and the prevalence of recent, ongoing selection in humans.

While an increasing number of studies have revealed how introgression from ancient hominins, such as Neanderthals or Denisovans, facilitated genetic adaptation in modern humans,<sup>19</sup> the occurrence of adaptive admixture among modern humans remains largely unexplored. Nonetheless, several empirical studies have reported candidate loci for positive selection in admixed populations.<sup>16,20–38</sup> A striking example is the Duffy null  $FY^*B^{ES}$  allele, which confers protection against *Plasmodium vivax* malaria.<sup>39,40</sup> Selection signals have been detected at the locus in diverse African-descent admixed populations from Madagascar, Cabo Verde, Sudan, and Pakistan,<sup>22,29,30,32,34</sup> suggesting strong, ongoing selection owing to *vivax* malaria in these regions. A variety of methods has been used to detect the signatures of adaptive admixture, relying on classic neutrality statistics, such as  $iHS$  or  $F_{ST}$ , and deviations from allele frequencies<sup>22,41</sup> or admixture proportions<sup>21,24,27,30,31,34–38</sup> expected under admixture and neutrality.<sup>42</sup> However, little

<sup>1</sup>Institut Pasteur, Université de Paris, CNRS UMR2000, Human Evolutionary Genetics Unit, Paris 75015, France; <sup>2</sup>Sorbonne Université, Collège Doctoral, Paris 75005, France; <sup>3</sup>Chair Human Genomics and Evolution, Collège de France, Paris 75005, France

\*Correspondence: [epatin@pasteur.fr](mailto:epatin@pasteur.fr) (E.P.), [quintana@pasteur.fr](mailto:quintana@pasteur.fr) (L.Q.-M.)

<https://doi.org/10.1016/j.ajhg.2022.02.011>

© 2022 American Society of Human Genetics.

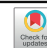

is known about how these neutrality statistics behave under scenarios of admixture with selection and, therefore, about the power of these statistics to detect adaptive admixture. More worrying, it has been suggested that artifactual signals of adaptive admixture can be observed because of errors in local ancestry inference (LAI) in complex genomic regions<sup>43,44</sup> and/or when the populations used as ancestral sources are poor proxies of the true source populations.<sup>16,31</sup> Lastly, reported signals of adaptive admixture are still limited to few populations relative to the large number of admixture events reported in humans.<sup>1,7,8</sup>

In this study, we compared the power of various neutrality statistics to detect adaptive admixture through computer simulations under different admixture with selection scenarios. We then used a combination of the most powerful statistics to scan the genomes of 15 different admixed human populations from around the world and detect candidate loci for adaptive admixture. In doing so, we confirm several, iconic signals of ongoing positive selection since admixture and identify cases that highlight pathogens as key drivers of recent genetic adaptation in humans.

## Material and methods

### General simulation settings

All the simulations were computed with the SLiM 3.2 engine<sup>45</sup> under the Wright-Fisher model. Each simulation consisted of a 2-Mb long locus characterized by varying recombination and mutation rates. For each simulation, we sampled the physical coordinates of a random 2-Mb genomic window in the human genome, excluding telomeric and centromeric regions, and assigned recombination rates based on the 1000 Genomes phase 3 genetic map<sup>46</sup> and mutation rates based on Francioli et al. mutation map.<sup>47</sup> To account for background selection, which is thought to be prevalent in the human genome and could affect the power of neutrality tests,<sup>48</sup> we simulated exon-like genetic elements positioned according to the position of exons in the sampled 2-Mb genomic window. Each simulated exon is made of positions under negative selection or under neutrality, mimicking non-synonymous and synonymous positions, respectively. We set deleterious mutations to occur three times more frequently than neutral mutations to account for codon degeneracy. The fitness effects of deleterious mutations were sampled from the gamma distribution inferred in Europeans by Boyko and colleagues.<sup>49</sup> For simulations that include positive selection, the beneficial mutation was set to appear in the middle of the 2-Mb simulated locus and assumed to be semi dominant. Because we used computationally intensive forward-in-time simulations, we rescaled population sizes and times according to  $N/\lambda$  and  $T/\lambda$ , with  $\lambda = 10$ , and used rescaled mutation, recombination, and selection parameters,  $\lambda\mu$ ,  $\lambda r$ , and  $\lambda s$ .<sup>45</sup> Of note, we found that simulating background selection has little impact on the power to detect alleles under strong positive selection in the admixed population ( $s \geq 0.05$ ; data not shown).

### Admixture with selection models

We performed simulations of a population that originates from admixture between two source populations, referred to as  $P_1$  and  $P_2$  (Figure S1). We assumed that  $P_1$  and  $P_2$  contributed  $\alpha_1$  and  $\alpha_2$

admixture proportions to the admixed population, with  $\alpha_1 + \alpha_2 = 1$ . We also assumed that  $P_1$  and  $P_2$  diverged  $T_{\text{div}}$  generations ago and the single-pulse admixture event occurred  $T_{\text{adm}}$  generations ago. We simulated three scenarios of admixture with selection (Figures 1 and S2). For scenarios 1 and 2, a beneficial mutation was set to appear in the  $P_1$  source population and is transmitted to the admixed population with either the same selection coefficient (scenario 1) or a selection coefficient set to 0 (scenario 2). For scenario 3, we adapted a combination of recipes 9.6.2 and 14.7 from the SLiM manual,<sup>50</sup> introducing a set of “ancestry marker” neutral mutations in the  $P_1$  source population, and randomly choosing one of them to become beneficial by setting its selection coefficient to  $s > 0$  in the admixed population only. We computed 500 simulations for each admixture with selection scenario, as well as 500 simulations for the null scenario (i.e., no positive selection). Because the goal of these simulations was to compare the power of neutrality statistics to detect positive selection, only the selection coefficient of the beneficial mutation  $s$  was given different values, ranging from  $s = 0.01$  to  $s = 0.05$ . All the other parameters were given fixed values: population sizes of source and admixed populations  $N = 10,000$ ; divergence time between source populations  $T_{\text{div}} = 2,000$  generations; admixture proportions  $\alpha_1 = 0.35$  and  $\alpha_2 = 0.65$ ; time of the single pulse admixture event  $T_{\text{adm}} = 70$  generations; time when the beneficial mutation appears  $T_{\text{mut}} = 350$  generations ago.

### Power of explored neutrality statistics

Neutrality statistics were computed for all genetic variants within the 2-Mb simulated loci under no positive selection (H0) and only for the selected mutation for simulated 2-Mb loci under positive selection (H1). We estimated detection power (i.e., the true positive rate [TPR]) for each statistic as the proportion of values under H1 that are above a varying threshold value under H0, corresponding to a given false positive rate (FPR). We computed  $F_{\text{ST}}$ ,  $\Delta\text{DAF}$ , and  $i\text{HS}$  by using selink.<sup>51</sup> We computed  $F_{\text{ST}}$  and  $\Delta\text{DAF}$  between the admixed population and the source population that does not experience positive selection. For  $i\text{HS}$ , we used a 200-kb window and normalized the values by bins of similar derived allele frequency (DAF).

For the admixture-specific statistics, we introduced an allele frequency-based statistic,  $F_{\text{adm}}$ , that measures the difference between  $x_i$ , the observed frequency of allele  $i$  in the admixed population, and  $y_i$ , the expected allele frequency under admixture and neutrality. It was shown that  $y_i = \sum_p \alpha_p x_{i,p}$ , which is the average of allele frequencies  $x_{i,p}$  observed in the source populations  $p$  weighted by estimated admixture proportions  $\alpha_p$ , where  $\sum_p \alpha_p = 1$  (Bernstein<sup>52</sup>). Under neutrality, the squared difference between  $x_i$  and  $y_i$ ,  $(x_i - y_i)^2$ , is the variance of allele frequencies in the admixed population due to genetic drift.<sup>42</sup> Thus,  $(x_i - y_i)^2$  can be interpreted as the genetic distance between the current admixed population and its ancestral population at the time of admixture. Analogously to  $F_{\text{ST}}$ , this genetic distance can be used to detect natural selection, as the change in frequency of a beneficial allele in time depends on its selection coefficient.<sup>53</sup>  $F_{\text{adm}}$  is thus defined as follows:

$$F_{\text{adm}} = \frac{\sum_i (x_i - y_i)^2}{2(1 - \sum_i y_i^2)},$$

where  $1 - \sum_i y_i^2$  is the expected heterozygosity in the admixed population, used here to allow comparisons among SNPs.

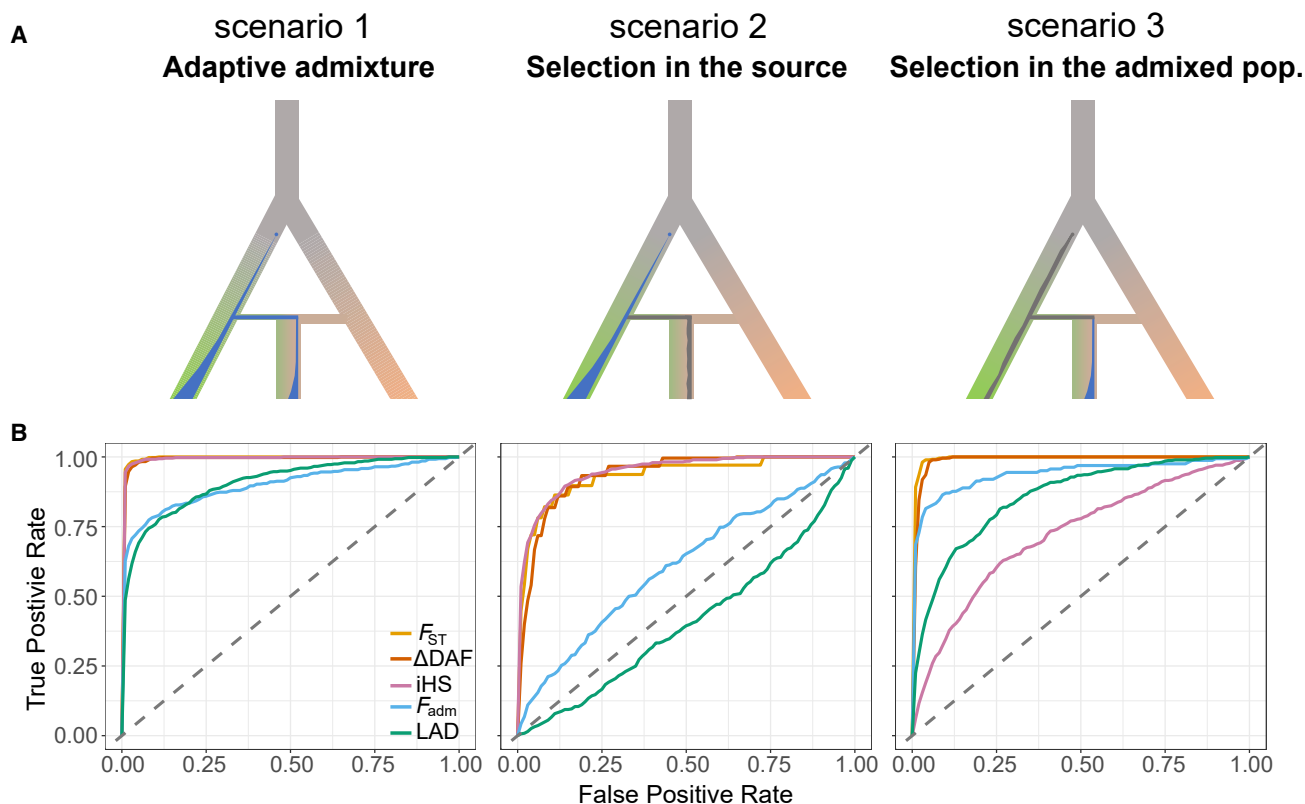

**Figure 1. Performance of neutrality statistics under different scenarios of admixture with selection**

(A) Explored scenarios of admixture with selection (from left to right): adaptive admixture, positive selection in the source population only, and positive selection in the admixed population only. The blue and gray points indicate the appearance of a new beneficial or neutral mutation, respectively. The blue and gray areas indicate changes in frequency of the beneficial and neutral mutation, respectively.

(B) Receiver operating characteristic (ROC) curves comparing the performance of classic neutrality statistics  $F_{ST}$ ,  $iHS$ , and  $\Delta DAF$  and the admixture-specific statistics  $F_{adm}$  and LAD across the three explored scenarios. The selection coefficient was fixed to  $s = 0.05$  to highlight the differences between statistics and between models (see Figure S2 for lower  $s$  values). False positive rate (FPR) is the fraction of simulated neutral sites that are incorrectly detected as under selection, and true positive rate (TPR) is the fraction of simulated adaptive mutations that are correctly detected as under selection.

When calculating  $F_{adm}$  in the simulated and observed data, the allele frequencies  $x_{i,p}$  at the time of admixture were estimated by the allele frequencies in the current generation, which is accurate when genetic drift in source populations is weak or when admixture is recent. We used admixture proportions from the simulated proportions  $\alpha_{sim}$ , for the simulated data, and the estimated proportions  $\bar{\alpha}$ , for the observed data, obtained by running ADMIXTURE v.1.23 (Alexander et al.;<sup>54</sup> see [empirical detection of adaptive admixture](#)). We verified with simulations that errors in the estimation of admixture proportions do not affect  $F_{adm}$  detection power (Figure S3A) by computing  $F_{adm}$  with  $\alpha$  sampled from a normal distribution  $\mathcal{N}(\mu = \alpha_{sim}, \sigma^2 = 0.0262)$ ; 0.026 is the highest root-mean-square deviation of the ADMIXTURE estimation.<sup>54</sup> Additionally, we excluded sites where the observed allele frequency in the admixed population  $x_i$  is higher (or lower) than the maximum (or minimum) of the frequencies  $x_{i,p}$  in the source populations. Although this can reduce the detection power in scenario 3, this filter increases power for the adaptive admixture scenario (Figure S3B), which is the focus of this study.

We also computed an LAI-based neutrality statistic, LAD, which measures the local ancestry deviation from the average genome-wide ancestry, defined as follows:

$$LAD_{w,p} = \alpha_{w,p} - \bar{\alpha}_p,$$

where  $\alpha_{w,p}$  is the admixture proportion from source population  $p$  for a given window  $w$  and  $\bar{\alpha}_p$  is the estimated genome-wide admixture proportion. Natural selection has been proposed to bias the estimation of admixture proportions since the first estimates of this parameter were obtained.<sup>55–57</sup> The rationale is that, when a beneficial allele is transmitted from a source population to the admixed population, estimated admixture proportions from this source population are expected to increase at the locus relative to neutral loci. As single-marker estimates of admixture proportions are sensitive to errors in the estimation of allele frequencies, more powerful haplotype-based methods have preferentially been used to detect natural selection since admixture.<sup>38</sup>

We used RFMix v1.5.4 to estimate local ancestry,<sup>58</sup> with default parameter values (except for  $-G$ , which was replaced with the simulated  $T_{adm}$  value) and using the forward-backward option with three expectation maximization steps. Because LAD is sensitive to phasing errors,<sup>58</sup> we incorporated potential phasing errors in our simulations by phasing, with SHAPEIT v.4.2.1 (Delaneau et al.<sup>59</sup>), unphased diploid individuals obtained from the combination of two simulated haploid individuals. Admixture proportions  $\bar{\alpha}_p$

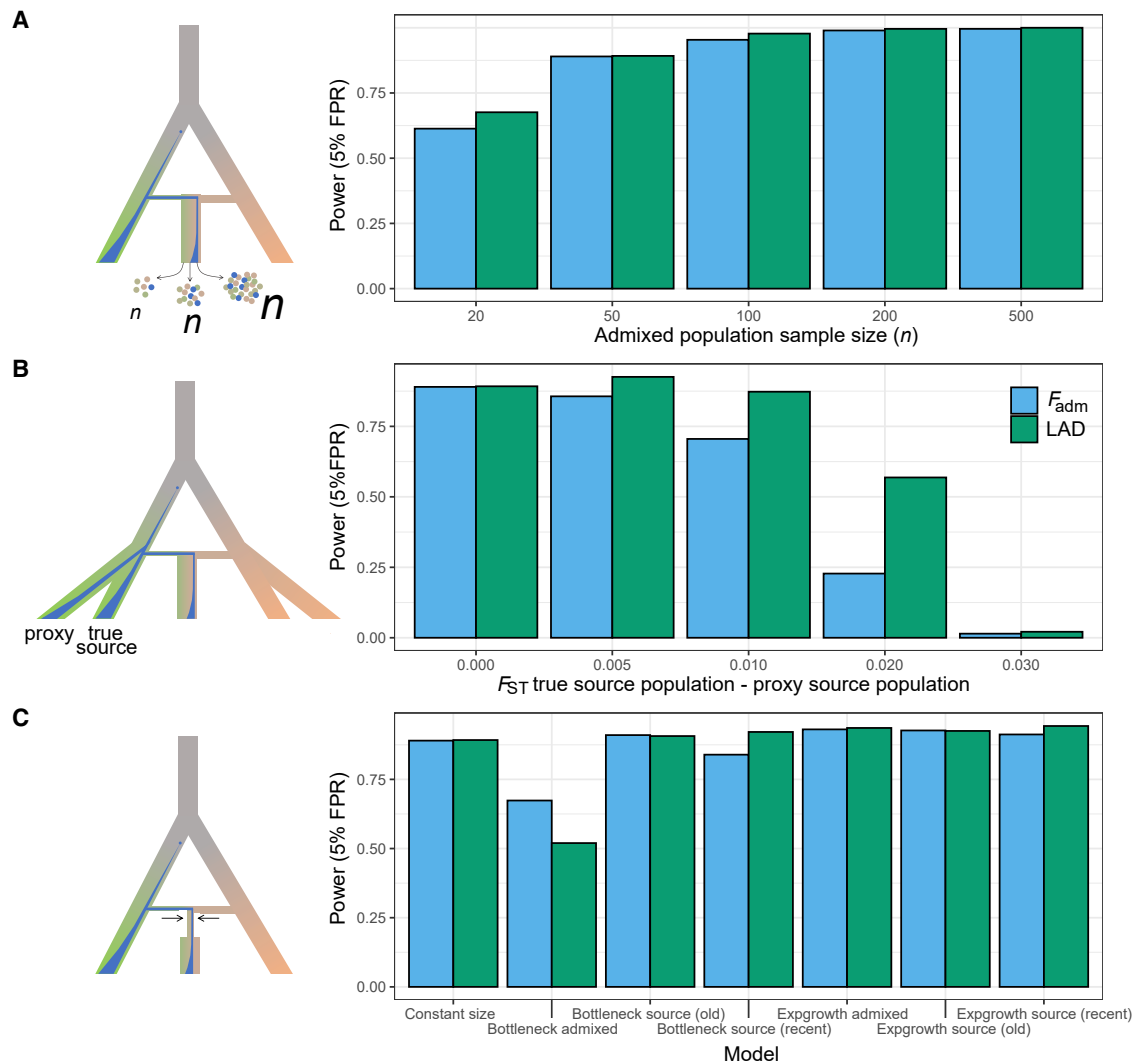

**Figure 2. Effects of study design and non-stationary demography on the power to detect adaptive admixture**

(A) Effects of the sample size of the admixed population ( $n$ ) on the detection power of  $F_{adm}$  and LAD at a fixed FPR = 5%. The simulated model is shown on the left, illustrating different values of  $n$ .

(B) Effects of the use of proxy source populations on the detection power of  $F_{adm}$  and LAD at a fixed FPR = 5%. The genetic distance between the true source and its proxy was measured by  $F_{ST}$ . The simulated model is shown on the left, including the true source and its proxy.

(C) Effects of non-stationary demography on the detection power of  $F_{adm}$  and LAD at a fixed FPR = 5%. The simulated model is shown on the left, including a bottleneck in the admixed population.

were estimated as the local ancestry inferred by RFMix averaged across loci for both the simulated and observed data.

### Sample size and source population choice scenarios

We explored five different values of sample sizes for the two source populations and the admixed population:  $n = 20, 50, 100, 200,$  and  $500$  individuals (Figures 2A and S4). When exploring the values for a given population, sample size for the other two was fixed to  $n = 50$  individuals. For the use of a proxy source population (Figure 2B), we simulated two additional populations that diverge 400 generations ago from each of the two source populations. We then used these proxy populations for  $F_{adm}$  and LAD calculations. To explore the effect of the genetic distance (estimated by  $F_{ST}$ ) between the proxy population and the true source population on detection power, we set the population size of the proxies

to 10,000, 4,000, 1,000, and 500, resulting in  $F_{ST}$  values of 0.005, 0.01, 0.02, and 0.03, respectively.

For the scenario of selection in the proxy source population only (Figure S5), we simulated two additional populations that diverge 600 generations ago from each of the two source populations. We randomly selected a mutation that occurred in the ancestral population of the  $P_1$  source population and its related proxy population and assigned it a selection coefficient of  $s = 0.02$  in the proxy population only, 599 generations ago. Under the latter scenario,  $F_{adm}$  and LAD detect mutations that are not beneficial in the admixed population and wrongly support positive selection in the  $P_2$  source population (Figures S5A and S5B). For comparison purposes, we thus compared  $F_{adm}$  and LAD distributions under this scenario to those obtained under a simple scenario of adaptive admixture (scenario 1, Figure 1) where the beneficial mutation is transmitted to the admixed population from the  $P_2$  source

population (Figure S5D). In all these scenarios, the following parameters were given a fixed value:  $N = 10,000$ ;  $T_{\text{div}} = 2,000$  generations;  $\alpha_1 = 0.35$ ;  $\alpha_2 = 0.65$ ;  $T_{\text{adm}} = 70$  generations;  $s = 0.02$ ; and  $T_{\text{mut}} = 1,400$  generations ago.

### Complex admixture scenarios

We estimated detection power under two additional admixture scenarios: a double pulse model and a constant continuous model (Figures S6A and S6B). For these scenarios to be comparable to the single pulse admixture scenario, we set the sum of the admixture proportions contributed by each pulse to be equal to  $\alpha_1 = 35\%$  and the average of the admixture dates to be equal to 70 generations. Namely, under the double pulse model, the admixed population originates from an admixture event that occurs 130 generations ago between two source populations, with  $\alpha_1 = 17.5\%$ , and receives a second admixture pulse from  $P_1$  10 generations ago with  $\alpha_1 = 17.5\%$ . Under the constant continuous model, the admixed population also originates from an admixture event occurring 130 generations ago between two source populations with  $\alpha_1 = 35\%/130 = 0.27\%$ , when  $T_{\text{adm}}$  is not rescaled, and  $a_1 = 2.7\%$ , when  $T_{\text{adm}}$  is rescaled, but receives an additional pulse from  $P_1$  of  $\alpha_1 = 2.7\%$  at each generation until present. In all scenarios, the following parameters were given a fixed value:  $N = 10,000$ ;  $T_{\text{div}} = 2,000$  generations;  $s = 0.02$ ; and  $T_{\text{mut}} = 1,400$  generations ago.

### Admixture parameters

Under the single pulse admixture model (Figure S1), we explored detection power as a function of different model parameters (Figures 3 and S7–S11; Table S1). In total, 32,956 compatible parameter combinations were explored. We thus reduced the number of simulations per combination from 500 to 100 to limit computational burden. For the frequency of the beneficial mutation in the source population at the time of admixture, instead of conditioning on the frequency within simulations (which would have drastically increased computations), we introduced the beneficial mutation  $T_{\text{mut}}$  generations ago in the source population on the basis of previous results.<sup>60</sup> For each statistic and parameter combination, we calculated the proportion of simulated sites under selection that were recovered by using a threshold of  $\text{FPR} = 5\%$ . We then averaged the power across demographic parameter values to obtain a single value for each combination of  $T_{\text{adm}}$ ,  $\alpha_1$ , and  $s$ . We performed a similar procedure to obtain a single value for each combination of  $T_{\text{adm}}$ ,  $\alpha_1$ , and one of the other parameters (e.g.,  $T_{\text{div}}$  and  $N$ ; Figures S7–S11).

### Non-stationary demography

We estimated detection power under five alternative demographic scenarios (Figures 2C and S6C), each with 500 simulations under adaptive admixture and 500 simulations with no positive selection. Demographic scenarios include: (1) a recent expansion of the source population, where the source population undergoes an expansion with a 5% growth rate since  $T_{\text{adm}}$ , from an initial  $N = 10,000$ ; (2) a recent expansion of the admixed population, where the admixed population undergoes an expansion with a 5% growth rate since  $T_{\text{adm}}$ , from an initial  $N = 10,000$ ; (3) an old expansion of the source population, where the source population undergoes an expansion with a 5% growth rate since  $T_{\text{adm}} + 500$  generations, from an initial  $N = 10,000$ ; (4) an old bottleneck in the source population, where the source population undergoes a 10-fold size reduction from  $T_{\text{div}} - 50$  to  $T_{\text{div}}$ , from an

initial  $N = 10,000$ ; and (5) a recent bottleneck in the admixed population, where the admixed population undergoes a 10-fold size reduction from  $T_{\text{adm}} - 50$  to  $T_{\text{adm}}$ , from an initial  $N = 10,000$ . We compared these scenarios to a constant population size scenario and the size of all populations fixed to  $N = 10,000$ . In all scenarios, the following parameters were given a fixed value:  $T_{\text{div}} = 2,000$  generations;  $\alpha_1 = 0.35$ ;  $\alpha_2 = 0.65$ ;  $T_{\text{adm}} = 70$  generations;  $s = 0.02$ ; and  $T_{\text{mut}} = 1,400$  generations ago.

### Empirical detection of adaptive admixture

We analyzed the genomes of 15 admixed populations to search for signals of adaptive admixture. The datasets and references for all admixed and source populations can be found in Table S2, as well as the final number of SNPs used after merging the datasets for admixed and source populations. For each merged dataset, we (1) excluded sites with a proportion of missing genotypes  $> 5\%$  via PLINK v2.0 (Chang et al.<sup>61</sup>), (2) excluded A/T and C/G variant sites, (3) excluded first- and second-degree-related individuals (kinship coefficient  $> 0.08$  computed with KING v2.2.2; Manichaikul et al.<sup>62</sup>), and (4) performed phasing by using SHAPEIT v4.2.1 with default parameter values. Additionally, we verified the validity of the admixture model for each set of source/admixed populations (Table S2) by computing admixture  $f_3$  statistics with admixr package v0.7.1 (Petr et al.<sup>63</sup>).

We obtained admixture proportions by running ADMIXTURE v1.23, considering the  $K$  value producing the lowest cross-validation error and a set of “independent” SNPs obtained by running the “-indep-pairwise” command with PLINK v2.0 with the following parameters: 50-SNP window, 5-SNP step, and  $r^2$  threshold of 0.5. We verified for each studied admixed population that the  $K$  value with the fewest cross-validation errors matches the number of source populations. Local ancestry was inferred with RFMix v1.5.4, after excluding 2 Mb at telomeres and centromeres of each chromosome, as well as invariant sites and singletons, and with default parameter values except for the generation time “-G,” which was given a value based on literature (Table S2).

We combined the SNP ranks for  $F_{\text{adm}}$  and LAD statistics by using Fisher’s method,<sup>64</sup> defined as follows:

$$X_{2k}^2 = -2 \sum_{i=1}^k \ln(r_i),$$

where  $r_i$  is defined as the rank of a given SNP for the statistic  $i$ , divided by the total number of analyzed SNPs (i.e., the empirical  $p$  value), and  $k = 2$  is the number of statistics.

Using simulations, we verified that this statistic followed a chi-squared distribution with  $2k = 4$  degrees of freedom under no positive selection (Figure 4A), including when the admixed population experienced a 10-fold bottleneck. In these simulations, we used the same parameter values as those in Figure 2C for the “constant size” and “bottleneck in the admixed population” scenarios. Statistical significance was defined based on Bonferroni correction: we considered a  $p$  value threshold of 0.05 divided by the number of 0.2-cM RFMix windows analyzed (all SNPs within the same window had the same local ancestry value), which yielded, on average, a  $p$  value threshold of  $3.5 \times 10^{-6}$  (Table S3). To reduce the number of false positives due to positive selection in a proxy source population only (Figure S5), we computed iHS in the two source populations and excluded from the list of candidate genes any locus that includes SNPs with both an  $|\text{iHS}| > 2$  in one source population and an excess of local ancestry from the other source population (Figure S5). To

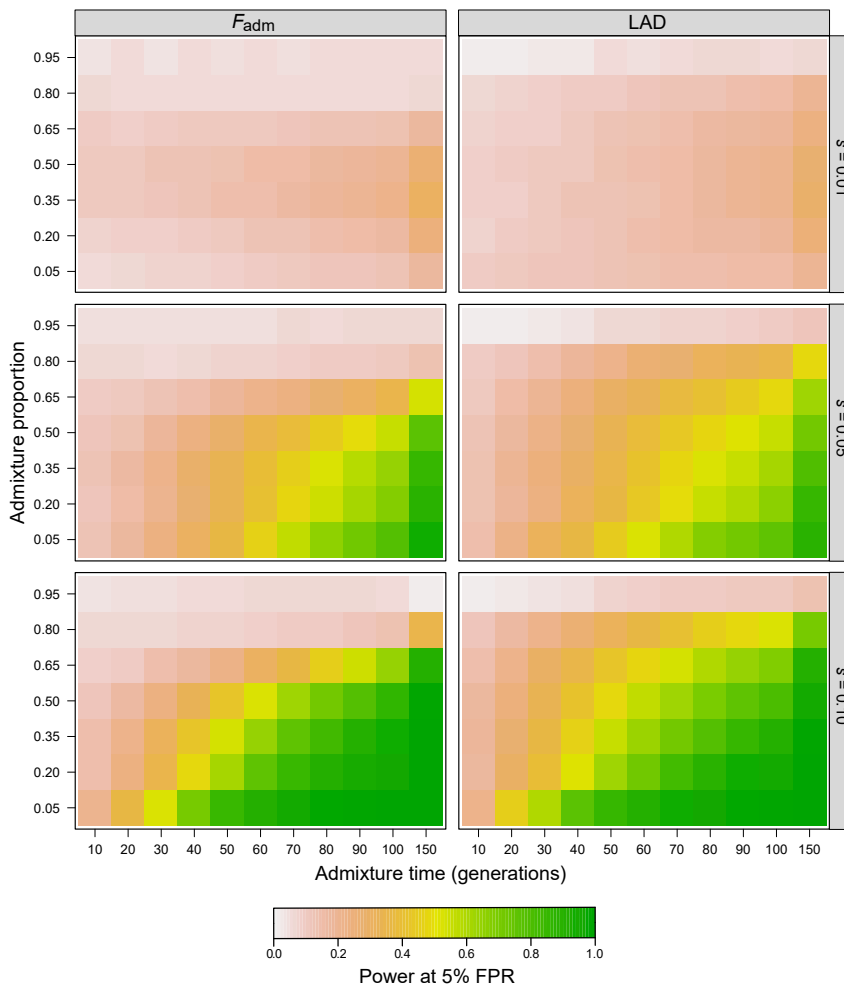

**Figure 3. Effects of model parameters on the power to detect adaptive admixture**  
Color represents average detection power for a fixed FPR = 5% across parameter combinations. The effects of other parameters, such as population sizes and divergence time (Figure S1 and Table S1), are shown in Figures S7–S11.

the source population, is transmitted to the admixed population, and becomes neutral in the admixed population only. We simulated this scenario to verify whether some neutrality statistics wrongly support positive selection in the admixed population because of a residual signal inherited from the source population. At the same time, this scenario is also useful for evaluating the power to detect residual signals of positive selection in the admixed population, as a means to detect genes under positive selection in source populations that no longer exist in an unadmixed form.<sup>9–15</sup> Finally, in scenario 3, a neutral mutation in the source population becomes beneficial in the admixed population only, at the time of admixture. This case is used for determining how neutrality statistics behave when natural selection operates since admixture on standing neutral variation.

annotate the different signals that passed this threshold, we chose the protein-coding gene within 250 kb of the variant with the highest V2G score.<sup>65</sup>

## Results

### Power estimation under different models of admixture with selection

To estimate the power to detect positive selection in admixed populations, we performed extensive forward-in-time simulations of a population that originates from admixture between two source populations (Figure S1). We introduced a beneficial mutation in one of the source populations, with a varying selection coefficient (material and methods). We considered three different scenarios of admixture with selection (Figures 1A and S2). Scenario 1 corresponds to adaptive admixture, where the admixed population inherits an allele that is beneficial in one of its source populations: the mutation is under positive selection in the source population, is transmitted to the admixed population, and remains beneficial—with the same selection coefficient—in the admixed population. In scenario 2, the beneficial allele is under positive selection in

We evaluated the performance, under each scenario, of three classic neutrality statistics,  $F_{ST}$ ,  $\Delta DAF$ , and  $iHS$ , as well as two statistics that are specifically designed to detect selection in the admixed population:  $F_{adm}$ , which is proportional to the squared difference between the observed and the expected allele frequency in the admixed population,<sup>22,42,57</sup> and LAD, the difference between the admixture proportion at the locus and its genome-wide average,<sup>38</sup> estimated on the basis of local ancestry inference (LAI) by RFMix (material and methods).<sup>58</sup> Receiver operating characteristic (ROC) curves indicate that both the classic neutrality statistics and  $F_{adm}$  and LAD are powerful to detect adaptive admixture (scenario 1) when the selection coefficient  $s = 0.05$  (>70% detection power for a false positive rate [FPR] of 5%; Figures 1B and S2), in agreement with a previous study.<sup>16</sup> Nevertheless, the power of  $F_{ST}$ ,  $\Delta DAF$ , and  $iHS$  is also high when the mutation is beneficial in the source population and is no longer selected in the admixed population (scenario 2), indicating that these statistics wrongly detect selection in the source population as selection in the admixed population. In contrast,  $F_{adm}$  and LAD detect adaptive admixture specifically, as their power under scenario 2 is low or nil (Figure 1B). Of note, our simulations also imply that the power of classic statistics is substantial when using the

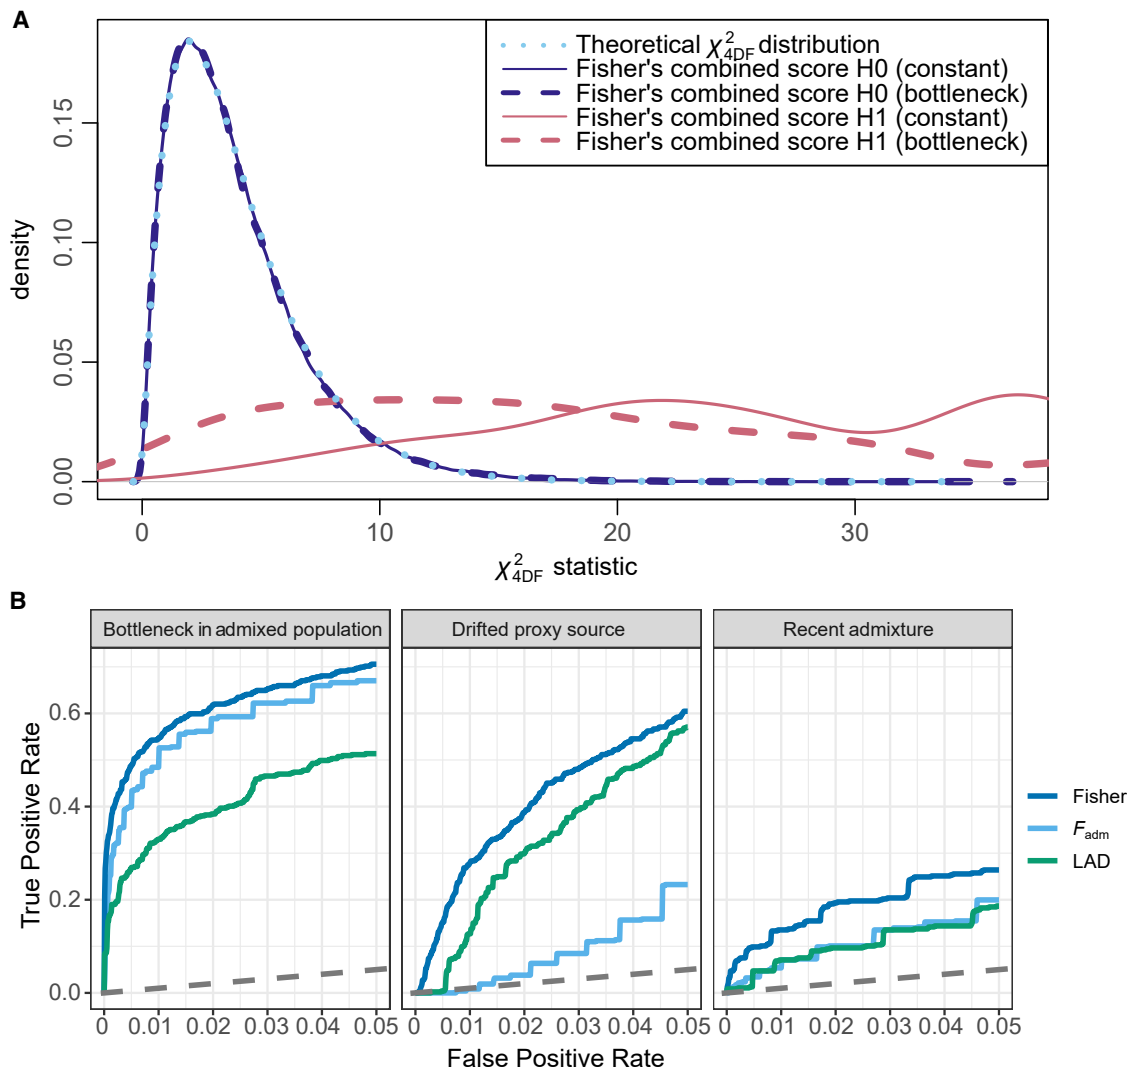

**Figure 4. Performance of the Fisher's method to detect adaptive admixture**

(A) Distributions of the combined Fisher's score under the null hypothesis of no positive selection (H0, blue lines) and under adaptive admixture (H1, pink lines), compared to the theoretical chi-squared distribution with 4 degrees of freedom (dotted light blue line). Solid and dashed lines indicate distributions under a constant population size and a 10-fold bottleneck in the admixed population, respectively.

(B) ROC curves for  $F_{adm}$ , LAD, and the combined Fisher's score under unfavorable scenarios for detecting adaptive admixture: a 10-fold bottleneck introduced in the admixed population, the use of a proxy source population having experienced strong drift ( $F_{ST}$  between the true source and proxy populations of 0.02), and recent admixture ( $T_{adm} = 10$  generations). Only FPR < 5% are shown.

admixed population as a means to detect selection in the source populations (>65% detection power when  $s = 0.05$  and FPR = 5%). Finally, LAD and iHS showed a reduced power to detect selection in the admixed population when the mutation is neutral in the source populations (scenario 3), relative to the adaptive admixture case (scenario 1). This may stem from the fact that, under scenario 3, the beneficial mutation has been selected for fewer generations than in scenario 1, resulting in a weaker signal. Furthermore, this scenario is similar to selection on standing variation, where the adaptive mutation may be present on several haplotypes, making it harder to detect.<sup>66</sup>

Collectively, our simulations indicate that  $F_{adm}$  and LAD are the only studied statistics that have substantial power

to specifically detect strong, ongoing selection in the admixed population and have more power to detect adaptive admixture than post-admixture selection on standing neutral variation. Because our objective is to detect the signatures of positive selection in the admixed population, and not in the source populations, we based all subsequent analyses on the  $F_{adm}$  and LAD statistics.

#### Effects of the study design

We investigated how sample size and the choice of source populations affect the power of  $F_{adm}$  and LAD to detect adaptive admixture signals (material and methods). We explored sample sizes ranging from  $n = 20$  to  $n = 500$  for both the admixed and the source populations. We found



that  $n = 100$  already provides optimal power because the variance of neutrality statistics is virtually unchanged when  $n \geq 100$  (Figures 2A and S4A). Conversely, we found that when  $n < 50$ , sampling error increases the variance of  $F_{\text{adm}}$  and LAD null distributions by as much as 5 times and ultimately decreases detection power by up to 40% (FPR = 5%). Interestingly, LAD detection power is not affected when the sample size of the source populations is low, even when  $n = 20$  (Figure S4B). Consistently, RFMix accuracy was shown to be only minimally reduced when the sample size of reference panels is as small as  $n = 3$ , as it uses both source and admixed individuals for LAI.<sup>58</sup>

Because obtaining genotype data for the true source populations of an admixed population is difficult, if not impossible, population geneticists often use related, present-day populations as proxies, which may lead to false adaptive admixture signals.<sup>16,31</sup> We explored how detection power is affected by the genetic distance between the true source population and a related population used as a proxy for  $F_{\text{adm}}$  and LAD computations (material and methods). We observed a difference in performance between  $F_{\text{adm}}$  and LAD, the latter's being more robust to the use of a proxy (Figure 2B). LAD maintains similar detection power even if the divergence between the true and proxy populations is  $F_{\text{ST}} = 0.01$ , whereas power decreases by 25% for  $F_{\text{adm}}$ . Such a difference in power may result from the nature of the two statistics. In the case of  $F_{\text{adm}}$ , the expected allele frequency is directly estimated from the allele frequencies observed in the proxy, and these frequencies are decreasingly correlated with those in the true source population as their divergence increases. On the other hand, LAD is derived from LAI by RFMix, which has been shown to be robust to the use of proxy reference populations.<sup>58</sup>

Nonetheless, we identified a potentially problematic scenario for both  $F_{\text{adm}}$  and LAD involving population proxies: when the selection event occurs specifically in the proxy source population (i.e., the mutation is not selected in both the true source and the admixed populations; Figure S5), spurious deviations in local ancestry and in allele frequencies were observed in the admixed population. Specifically, this generates an excess of local ancestry from the other source population and expected allele frequencies higher than those observed in the admixed population (Figures S5A and S5B). We found that this scenario produces weaker LAD values (i.e., lower detection power) but larger  $F_{\text{adm}}$  values (i.e., higher detection power) relative to an adaptive admixture event (Figures S5C–S5F). To remediate this, we performed a selection scan in the proxy population by using a single-population statistic, iHS, and excluded the top 1% values. In doing so, we managed to exclude approximately 90% of the outlier values of  $F_{\text{adm}}$  and LAD generated by this scenario. More importantly, because there is no correlation between iHS in the proxy population and  $F_{\text{adm}}$  or LAD in the case of adaptive admixture, none of the outlier values generated by a true adap-

tive admixture event were excluded by this analysis step (Figures S5G and S5H).

### Effects of the admixture model and non-stationary demography

Several studies have shown that admixture in humans has often involved multiple admixture pulses from two or more source populations.<sup>8,51,67–71</sup> We thus estimated the detection performance of  $F_{\text{adm}}$  and LAD under admixture models that are more complex than the single admixture pulse. We found that the power to detect adaptive admixture is only moderately reduced under a two-pulse admixture model or a constant, continuous admixture model: the true positive rate (TPR) decreases by <11% at a FPR = 5%, relative to the single pulse model (Figures S6A and S6B). This suggests that our power estimations are valid for a variety of admixture models.

Assuming a single-pulse admixture model, we then explored how detection power is impacted by key parameters of the adaptive admixture model, including the strength of selection  $s$ , the admixture time  $T_{\text{adm}}$ , the admixture proportion  $\alpha$ , and the divergence time between source populations  $T_{\text{div}}$  (Figures 3 and S7–S11; Table S1). As expected, we found that detection power is high only when the selection coefficient  $s$  is strong; the TPR is up to 94% and 27% when  $s = 0.05$  and 0.01, respectively (FPR = 5%; Figure 3). Power is also determined by the admixture time  $T_{\text{adm}}$ , as it affects the duration of selection; the TPR is up to 94% and 21% when  $T_{\text{adm}} \geq 70$  and  $\leq 20$  generations, respectively. Interestingly, we observed that the higher the admixture proportion  $\alpha$  (from the source population where the selected mutation appeared), the lower the detection power. Power decreases particularly when  $\alpha > 0.65$ , probably because of a threshold effect: if the beneficial allele is at high frequency and, e.g.,  $\alpha = 0.9$ , there is little room for the observed allele frequency or local ancestry to deviate from its expectation, making it hard to detect. Finally, as the divergence time between source populations decreases, the detection power of LAD is reduced by ~15% (51% versus 67% when  $T_{\text{div}} = 500$  or 2,000 generations, respectively; Figure S7), whereas that of  $F_{\text{adm}}$  is not affected (59% versus 55%, when  $T_{\text{div}} = 500$  or 2,000 generations, respectively). The reduced detection power of LAD is probably due to the decreased accuracy of RFMix when  $T_{\text{div}}$  decreases.<sup>72</sup>

We also estimated power under scenarios where demography deviates from a constant population size model. Indeed, demographic events, such as bottlenecks, have been shown to alter the performance of several neutrality statistics.<sup>73–79</sup> We simulated five demographic scenarios, including 10-fold bottlenecks and 5% growth rate expansions in either the admixed or the source populations (material and methods). We found that detection power is minimally affected under all expansion models (TPR decrease of 5% at a FPR = 5%; Figure 2C). In contrast, detection power is reduced by as much as 50% under the scenario where a 10-fold bottleneck is introduced in the

admixed population, relative to the stationary model. This is mirrored by the increased variance of  $F_{\text{adm}}$  and LAD null distributions under this scenario (Figure S6C). Finally, detection power of both  $F_{\text{adm}}$  and LAD is minimally affected when the 10-fold bottleneck is introduced in the source populations, either few generations after their divergence or before the admixture pulse (TPR decrease of 5% at a FPR = 5%; Figure 2C), suggesting that both statistics are relatively robust to increased genetic drift occurring in the source populations.

### Empirical detection of adaptive admixture in humans

We next sought to detect candidate genes for adaptive admixture in humans by scanning, with both  $F_{\text{adm}}$  and LAD statistics, the genomes of 15 worldwide populations (Table S2) that have experienced at least one admixture event in the last 5,000 years (i.e., the upper detection limit set for accurate local ancestry inference<sup>80</sup>). To improve detection power and facilitate candidate prioritization, we combined the empirical p values of both statistics with Fisher's method,<sup>64</sup> used here as a combined test for positive selection since admixture. We confirmed with simulations that the Fisher's score follows a chi-squared distribution with 4 degrees of freedom under the null hypothesis of absence of positive selection and when assuming different demographic scenarios (Figure 4A). Consistently, we found that  $F_{\text{adm}}$  and LAD statistics are not correlated under the null hypothesis (Spearman's coefficient = 0.03), whereas they are correlated under adaptive admixture (Spearman's coefficient = 0.96). Importantly, we found that Fisher's method increases detection power under unfavorable scenarios, relative to each individual statistic (Figure 4B). In particular, Fisher's method improves power when the admixed population experienced a 10-fold bottleneck, when admixture is recent ( $T_{\text{adm}} = 10$  generations), or when using a proxy population that experienced strong drift ( $F_{\text{ST}}$  with the true source population = 0.02). Given the limited knowledge on the past population sizes of the studied populations, which could increase FPR (Figure S6C), we applied a conservative Bonferroni correction on Fisher's p values, considering the number of RFMix genomic windows as the number of tests (all SNPs within a given window have the same value for LAD). This yielded a p value threshold of approximately  $p = 3.5 \times 10^{-6}$  (Table S3). Finally, we verified that the empirical distribution of Fisher's p values is uniform in all studied populations and found an excess of low p values for several populations (Figure S12), suggesting that adaptive admixture has occurred in these groups.

Our genome scans identified a number of previously reported signals of adaptive admixture. Among these, we found the *HLA* class II locus in Bantu-speaking populations from Gabon<sup>31</sup> (Figures 5A and 5C; top ranking SNP identified in *HLA-DPA1* [MIM: 142880];  $p = 7.9 \times 10^{-8}$ ; expected frequency of 0.33 versus observed frequency of 0.70), the *HLA* class I locus in Mexicans<sup>27,35,37,81</sup> (Figure S13; top ranked SNP identified in *ABCF1*;  $p = 2.2 \times 10^{-6}$ ; expected

frequency of 0.013 versus observed frequency of 0.039), the lactase persistence-associated *LCT/MCM6* locus (MIM: 223100) in the Fulani nomads of Burkina Faso<sup>82</sup> (Figure 6A; top ranked SNP identified in *CCNT2* [MIM: 603862];  $p = 1.1 \times 10^{-6}$ ; expected frequency of 0.12 versus observed frequency of 0.47), and *ACKR1* (previously referred as *DARC* [MIM: 613665]) in African-descent populations from Madagascar, the Sahel, and Pakistan<sup>29,30,34</sup> (Figures 5B and 5D and S13). For the latter locus, the top-ranking variant is rs12075 in the Malagasy ( $p = 3.4 \times 10^{-9}$ ; expected frequency 0.45 versus observed frequency of 0.93), as previously found.<sup>30</sup> This variant, also known as the Duffy null *FY\*B<sup>ES</sup>* allele (MIM: 110700), confers resistance against *Plasmodium vivax* infection in sub-Saharan Africans.<sup>39,40</sup> Together, these results confirm that our conservative approach can recover strong, well-documented signals of adaptive admixture.

### Candidate genes for adaptive admixture

We found several candidate loci for adaptive admixture (Figures 6 and S14), among which was the *MYH9/APOL1* (MIM: 603743) locus in the Fulani (Figures 6A and 6C;  $p = 1.3 \times 10^{-7}$ ; top ranked SNP in *IFT27* [MIM: 615870]; expected frequency of 0.15 versus observed frequency of 0.45). Common *APOL1* variants confer both protection against human African trypanosomiasis (HAT, or sleep sickness) and susceptibility to common kidney diseases (MIM: 612551) in African-descent individuals.<sup>83</sup> Another candidate is the *PKN2* (MIM: 602549) locus in East Indonesians ( $p = 1.1 \times 10^{-6}$ ; top ranked SNP in *ZNF326* [MIM: 614601]; expected frequency of 0.27 versus observed frequency of 0.46), which shows a large excess of Papuan ancestry (Figures 6B and 6D). *PKN2* plays a role in cellular signal transduction responses and has been reported as involved in the regulation of glucose metabolism in skeletal muscle.<sup>84</sup> A nearby locus, *LRR8B* (MIM: 612888), has been reported as a candidate for positive selection in Solomon Islanders,<sup>51</sup> although it did not show signals for adaptive admixture in this population. A unique, strong signal was detected at the *ARRDC4/IGF1R* (MIM: 147370) locus in Solomon Islanders ( $p = 7.4 \times 10^{-9}$ ; top ranked SNP close to *ARRDC4*; expected frequency of 0.09 versus observed frequency of 0.58), where an excess of East Asian-related ancestry was observed (Figures S14B and S14F). This locus was previously identified as a candidate for positive selection in near and western remote Oceanians.<sup>51</sup> *ARRDC4* is an arrestin that plays important roles in glucose metabolism and immune response to enterovirus infection,<sup>85</sup> whereas *IGF1R*, the receptor for the insulin-like growth factor, is a key determinant of body size and growth.<sup>86,87</sup> A last example is *CXCL13* (MIM: 605149) in the Nama pastoralists from South Africa (Figures S14A and S14E;  $p = 2.3 \times 10^{-6}$ ; top ranked SNP identified in *CXCL13*; expected frequency of 0.51 versus observed frequency of 0.80). The *CNOT6L/CXCL13* locus has previously been reported as suggestively associated with tuberculosis (TB) risk in South African populations with San ancestry.<sup>88</sup> However, we found that the top-ranking variants

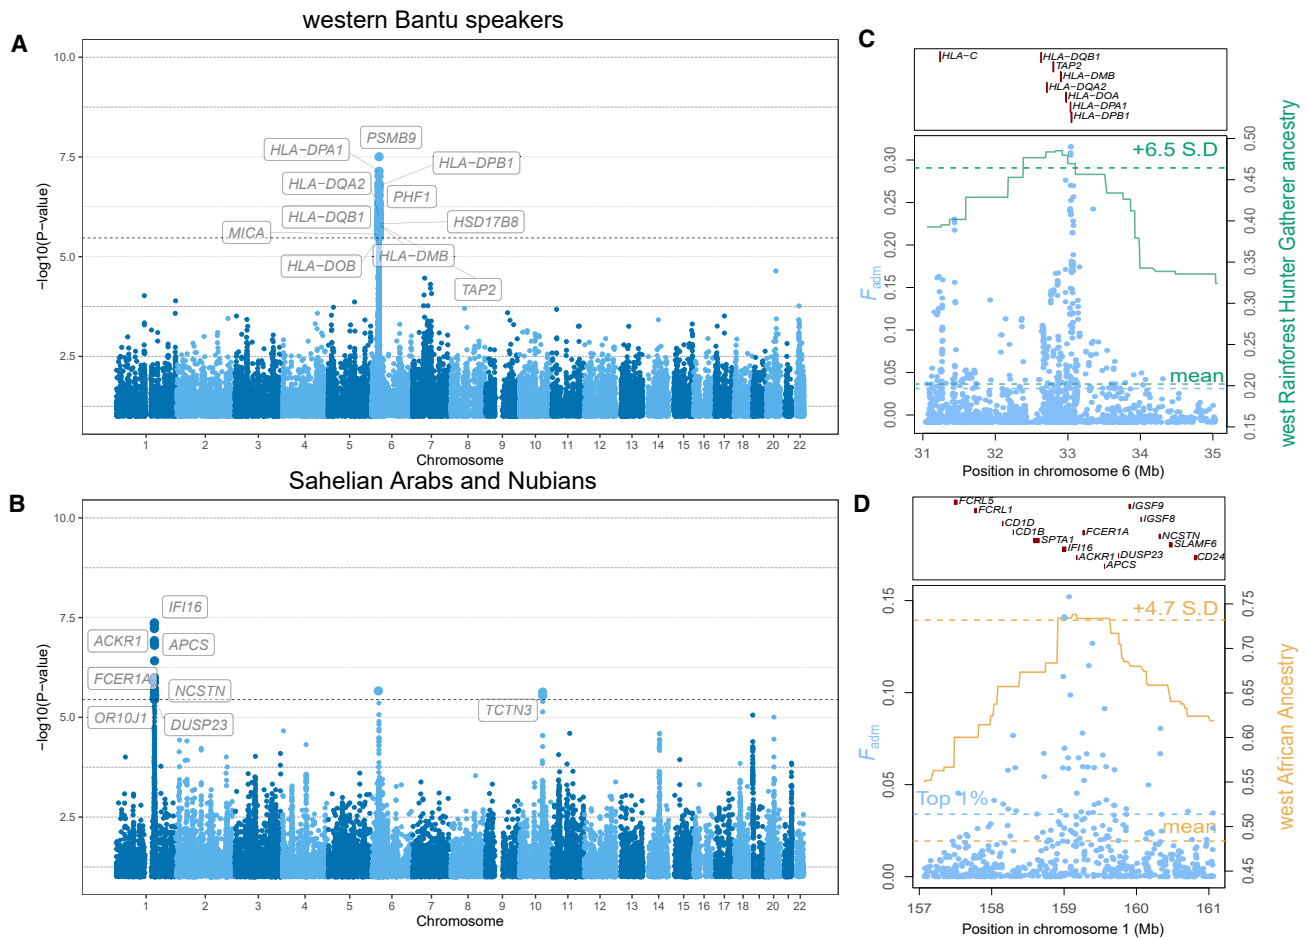

**Figure 5. Iconic genomic signals of adaptive admixture**

(A) Genome-wide signals of adaptive admixture in Bantu-speaking populations from Gabon.

(B) Genome-wide signals of adaptive admixture in Sahelian Arabs and Nubians.

(A and B) Highlighted blue points indicate variants that passed the Bonferroni significance threshold (shown by a horizontal dotted line). Gene labels were attributed on the basis of the gene with the highest V2G score within 250 kb of the candidate variant. p values were obtained assuming that combined Fisher's scores follow a chi-squared distribution under no selection.

(C) Local signatures of adaptive admixture for the *HLA* region in Bantu-speaking populations from Gabon.

(D) Local signatures of adaptive admixture for the *ACKR1* region in Sahelian Arabs and Nubians.

(C and D) Light blue points indicate  $F_{adm}$  values for individual variants. The green and gold solid lines indicate average local ancestry from African rainforest hunter-gatherers and West Africans respectively.

show outlier extended haplotype homozygosity in the Ju/'hoansi San, used as source population ( $iHS = -3.12$ ), while European ancestry is in excess at the locus in the Nama, suggesting a spurious signal due to positive selection in the proxy source population (Figure S5).

Lastly, we detected suggestive signals of adaptive admixture at genes shown to be strong candidates for positive selection, including the *MCM6/LCT* locus in the Bantu-speaking Bakiga of Uganda (Figure S15;  $p = 4.3 \times 10^{-6}$ ; top ranked SNP in *CCNT2*; expected frequency of 0.15 versus observed frequency of 0.31) and *TNFAIP3* (MIM: 191163) in East Indonesians, who show an excess of Papuan-related ancestry at the locus (Figure 6B;  $p = 5.0 \times 10^{-6}$ ; top ranked SNP in *TNFAIP3*; expected frequency of 0.27 versus observed frequency of 0.43). The *TNFAIP3* locus has not only been reported as evolving under positive selection in Papuans<sup>51</sup> but also as adaptively

introgressed from Denisovans.<sup>51,89–91</sup> *TNFAIP3* plays an important role in human immune tolerance to pathogen infections.<sup>92</sup> Collectively, these results indicate that adaptive admixture has occurred in various admixed populations around the world and highlight the immune system and nutrient metabolism as important targets of recent genetic adaptation.

## Discussion

In this study, we evaluated the power of several neutrality statistics to detect loci under positive selection in admixed populations and used these statistics to explore cases of adaptive admixture in the genomes of 15 worldwide human populations. Although  $F_{adm}$  and LAD, or closely related statistics based on the difference between observed and expected allele frequencies and admixture

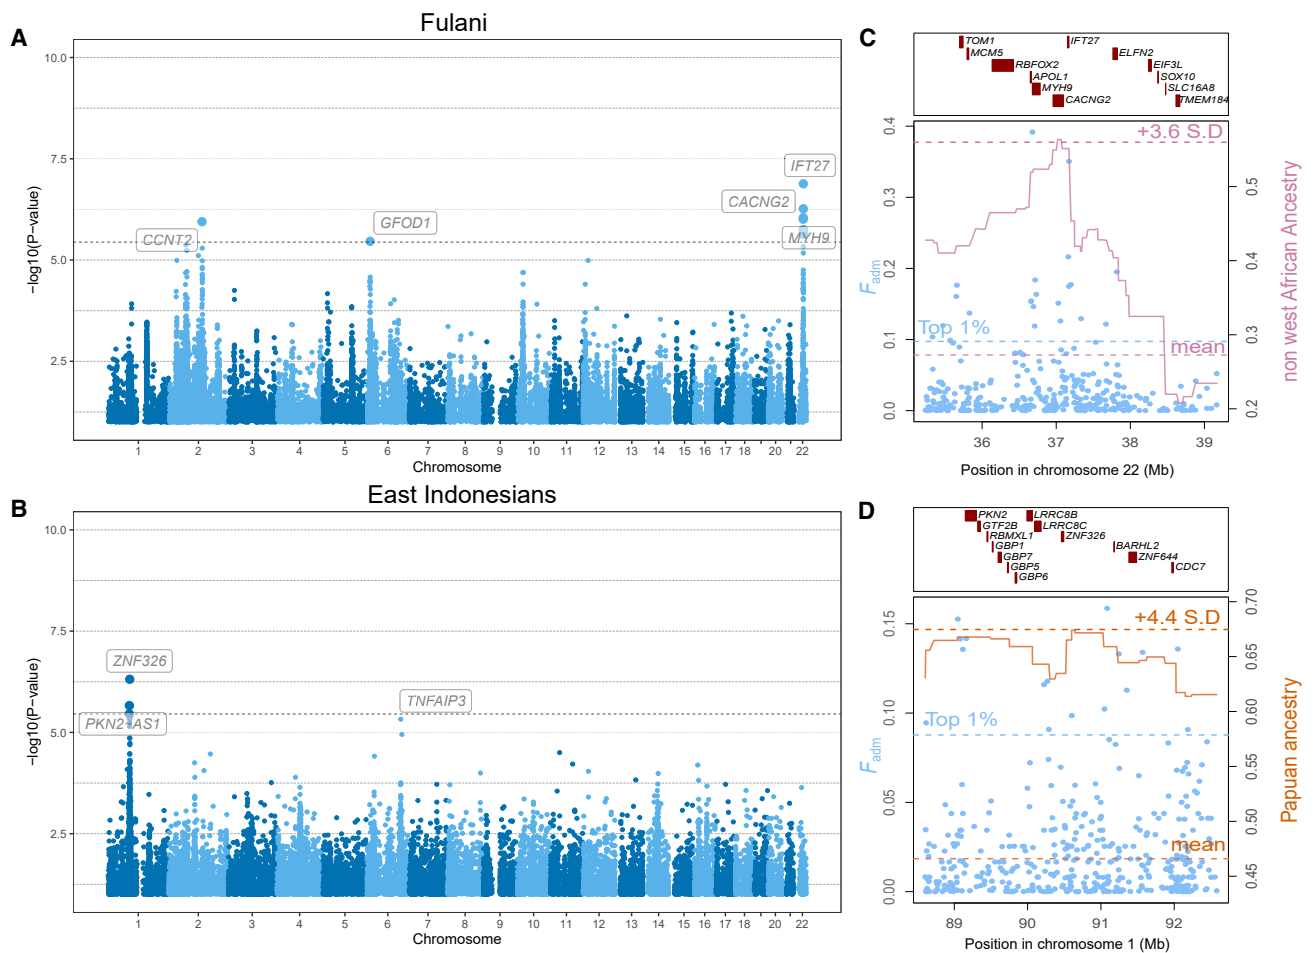

**Figure 6. Genomic signals of adaptive admixture discovered in this study**

(A) Genome-wide signals of adaptive admixture in the Fulani nomads of West Africa.

(B) Genome-wide signals of adaptive admixture in East Indonesians.

(A and B) Highlighted blue points indicate variants that pass the Bonferroni significance threshold (shown by a horizontal dotted line). Gene labels were attributed on the basis of the gene with the highest V2G score within 250 kb of the candidate variant. p values were obtained assuming that combined Fisher's scores follow a chi-squared distribution under no selection.

(C) Local signatures of adaptive admixture for the *IFT27/MYH9/APOL1* region in the Fulani nomads.

(D) Local signatures of adaptive admixture for the *PKN2/LRR8CB* region in East Indonesians.

(C and D) Light blue points indicate  $F_{adm}$  values for individual variants. The pink solid line indicates the local ancestry from Europeans and North Africans, and the orange solid line indicates the local ancestry from Papuans.

proportions, have been used in several empirical studies, their power has not been thoroughly evaluated. Here, we showed that these statistics are powerful to detect adaptive admixture and have little power to detect residual signals of positive selection in the source populations. Thus,  $F_{adm}$  and LAD are suited to search for loci under positive selection in admixed populations since admixture, particularly when selection is strong (i.e.,  $s \geq 0.05$ ), admixture is relatively old (i.e.,  $T_{adm} > 2,000$  years) and the admixture proportion is moderate-to-low (i.e.,  $\alpha < 0.6$ ). Notably, we found that power is marginally affected when admixture has been recurrent, a feature that is convenient given the difficulty to distinguish between single-pulse, double-pulse, or more complex admixture models from the genetic data.<sup>8,51,67–71</sup> Furthermore,  $F_{adm}$  is more powerful than LAD when selection occurs in the admixed population only and when the divergence time between source

populations is low ( $T_{div} = 500$  generations), whereas LAD is more powerful than  $F_{adm}$  when source sample sizes are low (i.e.,  $n = 20$ ) and when the true and proxy source populations are distantly related (i.e.,  $F_{ST} \geq 0.01$ ; Table S4). The latter result is consistent with the known robustness of LAI to cases where the populations used as reference sources are poor proxies of the true source populations.<sup>58</sup> Nonetheless, caution must be taken when handling population proxies, as selection occurring only in the proxy population can produce artifactual genomic signals, for both LAD and  $F_{adm}$ , that might be misinterpreted as adaptive admixture.<sup>16,31,51</sup> We suggest that performing selection scans on the proxy source populations can help distinguish false from true adaptive admixture signals. We also caution that  $F_{adm}$  calculation relies on the accurate estimation of admixture proportions, which can be biased under certain scenarios.<sup>93</sup> Finally, we found that

combining  $F_{adm}$  and LAD statistics into a unique statistic, based on the Fisher's method, provides well-calibrated p values under different models and substantially increases power under several realistic admixture with selection scenarios, relative to individual statistics.

When applying this combined method on the empirical data, we identified several previously reported candidate variants for adaptive admixture. These include the *ACKR1* Duffy null allele detected in admixed populations from Madagascar,<sup>30</sup> the Sahel,<sup>34</sup> and Pakistan,<sup>29</sup> the lactase persistence c.-13910C>T *LCT* allele in the Fulani from West Africa,<sup>82</sup> and *HLA* alleles in Bantu-speaking populations from western Central Africa<sup>31</sup> and Mexicans.<sup>27,35,37,81</sup> These candidate loci were detected previously on the basis of LAD only or in combination with classic neutrality statistics. However, the detection of natural selection with the LAD statistic has previously been questioned because deviations in local ancestry can be explained as artifacts of long-range linkage disequilibrium (LD), which was not properly modeled by the first-generation LAI methods.<sup>43</sup> Our analyses reveal that these genomic regions not only show outlier LAD values but also outlier  $F_{adm}$  values. Because  $F_{adm}$  only depends on allele frequencies at the SNP of interest, these results support the view that the observed signals of adaptive admixture are true and unlikely to be explained by incorrectly modeled LD.

Our results also highlight novel signals of adaptive admixture, such as the *APOL1/MYH9* locus in the Fulani nomads of West Africa. Interestingly, an *APOL1* haplotype of non-African origin, named G3, was shown to be under positive selection in the Fulani of Cameroon,<sup>94</sup> in line with the excess of non-African ancestry that we detected at the locus in the Fulani from Burkina Faso. Nevertheless, the physiological effect of the G3 variants is still debated: experimental work suggests that the G3 haplotype has no lytic activity against *Trypanosoma* parasites and is not associated with increased susceptibility to common kidney diseases in African Americans.<sup>95</sup> Alternatively, the significant excess of non-African ancestry observed at the locus may be due to strong negative selection against HAT-resistance *APOL1* alleles (i.e., G1 and G2 haplotypes) in regions where the incidence of sleeping sickness is low, such as Burkina Faso.<sup>96</sup> As they do not confer a selective advantage in *Trypanosoma brucei*-free regions, the G1 and G2 haplotypes only strongly increase the risk for chronic kidney diseases<sup>83</sup> and thus become disadvantageous. Further epidemiological and experimental work will be needed to confirm this hypothesis.

In accordance with our simulation study, several of the putatively selected alleles detected here are known to be under strong positive selection in humans, including alleles in *ACKR1*,<sup>97–99</sup> *LCT*,<sup>100,101</sup> or *HLA*.<sup>81</sup> Given that we focused on admixture events occurring during the five last millennia, only alleles that confer a very strong selective advantage can leave detectable signatures in the genomes of the studied admixed individuals. In addition to their confirmatory nature, these results improve our un-

derstanding of the selective advantage conferred by these well-known beneficial alleles. First, because  $F_{adm}$  and LAD detect natural selection since admixture only, selection studies in recently admixed populations represent a valuable tool to detect recent ongoing selection. Second, admixed and source populations have often lived in different environments, so evolutionary studies of adaptive admixture can help refine correlations between signatures of natural selection and environmental pressures. An illustrative example is the Duffy null *FY\*B<sup>ES</sup>* allele, which is fixed or nearly fixed in most sub-Saharan African populations.<sup>99</sup> It has long been proposed that natural selection has favored this allele because it protects against malaria due to *Plasmodium vivax*.<sup>102</sup> Indeed, cellular experiments have shown that the parasite depends on the *ACKR1* protein for erythrocytic infection.<sup>39,40</sup> However, recent studies have casted doubt on this result because *P. vivax* has been detected in *FY\*B<sup>ES</sup>* homozygous carriers,<sup>103,104</sup> suggesting that parasite invasion is possible when its human receptor *ACKR1* is absent. We and others have found signatures of adaptive admixture for the *FY\*B<sup>ES</sup>* allele in African-descent admixed populations from Madagascar,<sup>22,30</sup> Cabo Verde,<sup>32</sup> the Sahel,<sup>34</sup> and Pakistan<sup>29</sup> but not in North Americans or South Africans.<sup>16,31</sup> Evidence of ongoing positive selection for Duffy negativity is thus confined to regions where the current incidence of *P. vivax* malaria is estimated to be high.<sup>105</sup> These findings thus support the view that resistance to *vivax* malaria is the main evolutionary force driving the frequency of the *FY\*B<sup>ES</sup>* allele in humans.

Overall, our study reports evidence that recent admixture has facilitated human genetic adaptation to varying environmental conditions. It has been proposed that gene flow can promote rapid evolution when the demographic structure of a species is unstable.<sup>18</sup> Our findings support this view, as *Homo sapiens* is a structured species that has settled a large variety of ecological niches and has undergone large-scale, massive dispersals followed by extensive gene flow.<sup>1,7,8</sup> We thus anticipate that more cases of adaptive admixture in humans will soon be uncovered, thanks to methodological and technological advances. Importantly, given the highly conservative nature of our approach, it is very likely that we do not recover variants that have probably been weakly to mildly selected since admixture, such as *TNFAIP3* in Indonesian populations of Papuan-related ancestry<sup>51,89–91</sup> or the *MCM6/LCT* locus in the Bantu-speaking Bakiga from Uganda.<sup>31</sup> The use of new, accurate LAI methods<sup>80,106</sup> and the development of novel powerful neutrality statistics, such as the integrated decay in ancestry tracts (iDAT),<sup>32</sup> and model-based probabilistic frameworks<sup>107</sup> are promising paths to improve the power to detect adaptive admixture while better accounting for the demography of admixed populations. Furthermore, many human traits are known to be highly polygenic, suggesting that polygenic adaptation is a key driver of phenotypic evolution,<sup>108</sup> highlighting the need for new methods to detect polygenic selection since admixture.<sup>109</sup> Finally, genomic studies of adaptive

admixture are expected to be more powerful when admixture is ancient, but statistical tests for admixture in modern genomes have low power when admixture time is older than 5,000 years.<sup>8</sup> Ancient genomics studies offer a great opportunity to circumvent this limitation by revealing how human populations interacted in the past and how beneficial alleles have spread in time and space.<sup>41,110</sup>

### Data and code availability

Accession numbers for the genotype data used in this study are listed in Table S2. All SLiM parameter files can be found at the following: <https://github.com/h-e-g/ADAD>.

### Supplemental information

Supplemental information can be found online at <https://doi.org/10.1016/j.ajhg.2022.02.011>.

### Acknowledgments

We thank all volunteers participating in this research; Sophie Créno and the HPC Core Facility of Institut Pasteur (Paris) for the management of computational resources; the two anonymous reviewers for their useful comments; and Omar Alva Sanchez, Denis Pierron, Thierry Letellier, Mario Vicente, Carina Schlebusch, Andres Moreno-Estrada, Andres Ruiz-Linares, and the Health Aging and Body Composition (Health ABC) Study for kindly providing access to their data. We also thank Javier Bougeard, Lara Rubio Arauna, Jérémy Choin, Maxime Rotival, Paul Verdu, and Olivier Tenaillon for helpful discussions. S.C.-E. is supported by Sorbonne Université Doctoral College, the Inception program (Investissement d'Avenir grant ANR-16-CONV-0005), and the Institut Pasteur. The laboratory of human evolutionary genetics is supported by the Institut Pasteur, the Collège de France, the CNRS, the Fondation Allianz-Institut de France, the French Government's Investissement d'Avenir program, Laboratoires d'Excellence "Integrative Biology of Emerging Infectious Diseases" (ANR-10-LABX-62-IBEID) and "Milieu Intérieur" (ANR-10-LABX-69-01), the Fondation de France (No. 00106080), the Fondation pour la Recherche Médicale (équipe FRM DEQ20180339214), and the French National Research Agency (ANR-19-CE35-0005).

### Declaration of interests

The authors declare no competing interests.

Received: October 15, 2021

Accepted: February 14, 2022

Published: March 7, 2022

### Web resources

1000 Genomes Phase 3 and HGDP genomic data, <https://www.internationalgenome.org/data>

admixr R package, <https://cran.r-project.org/web/packages/admixr/index.html>

ADMIXTURE software, <https://dalexander.github.io/admixture/index.html>

dbGAP database, <https://dbgap.ncbi.nlm.nih.gov/>

Estonian Biocenter public genomic data, <https://evolbio.ut.ee>

European Genome-Phenome archive, <https://ega-archive.org/>  
Jakobsson Lab genomic data, <http://jakobssonlab.iob.uu.se/data/>  
OMIM, <http://www.omim.org/>  
PLINK software, <https://www.cog-genomics.org/plink/2.0/>  
RFMix software, [https://www.dropbox.com/s/cm44s4duh9gozi9/RFMix\\_v1.5.4.zip](https://www.dropbox.com/s/cm44s4duh9gozi9/RFMix_v1.5.4.zip)  
selink software, <https://github.com/h-e-g/selink>  
SHAPEIT software, <https://odelaneau.github.io/shapeit4/>  
SLiM software, <https://messengerlab.org/slim/>

### References

1. Nielsen, R., Akey, J.M., Jakobsson, M., Pritchard, J.K., Tishkoff, S., and Willerslev, E. (2017). Tracing the peopling of the world through genomics. *Nature* 541, 302–310.
2. Novembre, J., and Di Rienzo, A. (2009). Spatial patterns of variation due to natural selection in humans. *Nat. Rev. Genet.* 10, 745–755.
3. Quintana-Murci, L. (2019). Human Immunology through the Lens of Evolutionary Genetics. *Cell* 177, 184–199.
4. Rees, J.S., Castellano, S., and Andrés, A.M. (2020). The Genomics of Human Local Adaptation. *Trends Genet.* 36, 415–428.
5. Fan, S., Hansen, M.E.B., Lo, Y., and Tishkoff, S.A. (2016). Going global by adapting local: A review of recent human adaptation. *Science* 354, 54–59.
6. Mathieson, I. (2020). Human adaptation over the past 40,000 years. *Curr. Opin. Genet. Dev.* 62, 97–104.
7. Pickrell, J.K., and Reich, D. (2014). Toward a new history and geography of human genes informed by ancient DNA. *Trends Genet.* 30, 377–389.
8. Hellenthal, G., Busby, G.B.J., Band, G., Wilson, J.F., Capelli, C., Falush, D., and Myers, S. (2014). A genetic atlas of human admixture history. *Science* 343, 747–751.
9. Johnson, N.A., Coram, M.A., Shriver, M.D., Romieu, I., Barsh, G.S., London, S.J., and Tang, H. (2011). Ancestral components of admixed genomes in a Mexican cohort. *PLoS Genet.* 7, e1002410.
10. Vicuña, L., Fernandez, M.I., Vial, C., Valdebenito, P., Charparro, E., Espinoza, K., Ziegler, A., Bustamante, A., and Eyheramendy, S. (2019). Adaptation to Extreme Environments in an Admixed Human Population from the Atacama Desert. *Genome Biol. Evol.* 11, 2468–2479.
11. Yelmen, B., Mondal, M., Marnetto, D., Pathak, A.K., Montinaro, F., Gallego Romero, I., Kivisild, T., Metspalu, M., and Pagani, L. (2019). Ancestry-Specific Analyses Reveal Differential Demographic Histories and Opposite Selective Pressures in Modern South Asian Populations. *Mol. Biol. Evol.* 36, 1628–1642.
12. Lohmueller, K.E., Bustamante, C.D., and Clark, A.G. (2011). Detecting directional selection in the presence of recent admixture in African-Americans. *Genetics* 187, 823–835.
13. Reynolds, A.W., Mata-Míguez, J., Miró-Herrans, A., Briggs-Cloud, M., Sylestine, A., Barajas-Olmos, F., Garcia-Ortiz, H., Rzhetskaya, M., Orozco, L., Raff, J.A., et al. (2019). Comparing signals of natural selection between three Indigenous North American populations. *Proc. Natl. Acad. Sci. USA* 116, 9312–9317.
14. Ávila-Arcos, M.C., McManus, K.F., Sandoval, K., Rodríguez-Rodríguez, J.E., Villa-Islas, V., Martin, A.R., Luisi, P., Peñalosa-Espinosa, R.I., Eng, C., Huntsman, S., et al. (2020). Population History and Gene Divergence in Native Mexicans

- Inferred from 76 Human Exomes. *Mol. Biol. Evol.* *37*, 994–1006.
15. Huerta-Sánchez, E., Degiorgio, M., Pagani, L., Tarekegn, A., Ekong, R., Antao, T., Cardona, A., Montgomery, H.E., Cavalleri, G.L., Robbins, P.A., et al. (2013). Genetic signatures reveal high-altitude adaptation in a set of Ethiopian populations. *Mol. Biol. Evol.* *30*, 1877–1888.
  16. Bhatia, G., Tandon, A., Patterson, N., Aldrich, M.C., Ambrosone, C.B., Amos, C., Bandera, E.V., Berndt, S.I., Bernstein, L., Blot, W.J., et al. (2014). Genome-wide scan of 29,141 African Americans finds no evidence of directional selection since admixture. *Am. J. Hum. Genet.* *95*, 437–444.
  17. Refoyo-Martínez, A., da Fonseca, R.R., Halldórsdóttir, K., Árnason, E., Mailund, T., and Racimo, F. (2019). Identifying loci under positive selection in complex population histories. *Genome Res.* *29*, 1506–1520.
  18. Slatkin, M. (1987). Gene flow and the geographic structure of natural populations. *Science* *236*, 787–792.
  19. Racimo, F., Sankararaman, S., Nielsen, R., and Huerta-Sánchez, E. (2015). Evidence for archaic adaptive introgression in humans. *Nat. Rev. Genet.* *16*, 359–371.
  20. Pagani, L., Kivisild, T., Tarekegn, A., Ekong, R., Plaster, C., Gallego Romero, I., Ayub, Q., Mehdi, S.Q., Thomas, M.G., Luiselli, D., et al. (2012). Ethiopian genetic diversity reveals linguistic stratification and complex influences on the Ethiopian gene pool. *Am. J. Hum. Genet.* *91*, 83–96.
  21. Bryc, K., Velez, C., Karafet, T., Moreno-Estrada, A., Reynolds, A., Auton, A., Hammer, M., Bustamante, C.D., and Ostrer, H. (2010). Colloquium paper: genome-wide patterns of population structure and admixture among Hispanic/Latino populations. *Proc. Natl. Acad. Sci. USA* *107* (Suppl 2), 8954–8961.
  22. Hodgson, J.A., Pickrell, J.K., Pearson, L.N., Quillen, E.E., Prista, A., Rocha, J., Soodyall, H., Shriver, M.D., and Perry, G.H. (2014). Natural selection for the Duffy-null allele in the recently admixed people of Madagascar. *Proc. Biol. Sci.* *281*, 20140930.
  23. Breton, G., Schlebusch, C.M., Lombard, M., Sjödin, P., Soodyall, H., and Jakobsson, M. (2014). Lactase persistence alleles reveal partial East African ancestry of southern African Khoe pastoralists. *Curr. Biol.* *24*, 852–858.
  24. Jeong, C., Alkorta-Aranburu, G., Basnyat, B., Neupane, M., Witonsky, D.B., Pritchard, J.K., Beall, C.M., and Di Rienzo, A. (2014). Admixture facilitates genetic adaptations to high altitude in Tibet. *Nat. Commun.* *5*, 3281.
  25. Macholdt, E., Lede, V., Barbieri, C., Mpoloka, S.W., Chen, H., Slatkin, M., Pakendorf, B., and Stoneking, M. (2014). Tracing pastoralist migrations to southern Africa with lactase persistence alleles. *Curr. Biol.* *24*, 875–879.
  26. Rishishwar, L., Conley, A.B., Wigington, C.H., Wang, L., Valderrama-Aguirre, A., and Jordan, I.K. (2015). Ancestry, admixture and fitness in Colombian genomes. *Sci. Rep.* *5*, 12376.
  27. Zhou, Q., Zhao, L., and Guan, Y. (2016). Strong Selection at MHC in Mexicans since Admixture. *PLoS Genet.* *12*, e1005847.
  28. Busby, G., Christ, R., Band, G., Leffler, E., Le, Q.S., Rockett, K., Kwiatkowski, D., and Spencer, C. (2017). Inferring adaptive gene-flow in recent African history. Preprint at bioRxiv. <https://doi.org/10.1101/205252>.
  29. Laso-Jadart, R., Harmant, C., Quach, H., Zidane, N., Tyler-Smith, C., Mehdi, Q., Ayub, Q., Quintana-Murci, L., and Patin, E. (2017). The Genetic Legacy of the Indian Ocean Slave Trade: Recent Admixture and Post-admixture Selection in the Makranis of Pakistan. *Am. J. Hum. Genet.* *101*, 977–984.
  30. Pierron, D., Heiske, M., Razafindrazaka, H., Pereda-Loth, V., Sanchez, J., Alva, O., Arachiche, A., Boland, A., Olaso, R., Del-euze, J.-F., et al. (2018). Strong selection during the last millennium for African ancestry in the admixed population of Madagascar. *Nat. Commun.* *9*, 932.
  31. Patin, E., Lopez, M., Grollemund, R., Verdu, P., Harmant, C., Quach, H., Laval, G., Perry, G.H., Barreiro, L.B., Froment, A., et al. (2017). Dispersals and genetic adaptation of Bantu-speaking populations in Africa and North America. *Science* *356*, 543–546.
  32. Hamid, I., Korunes, K.L., Beleza, S., and Goldberg, A. (2021). Rapid adaptation to malaria facilitated by admixture in the human population of Cabo Verde. *eLife* *10*, e63177.
  33. Schlebusch, C.M., Skoglund, P., Sjödin, P., Gattepaille, L.M., Hernandez, D., Jay, F., Li, S., De Jongh, M., Singleton, A., Blum, M.G.B., et al. (2012). Genomic variation in seven Khoe-San groups reveals adaptation and complex African history. *Science* *338*, 374–379.
  34. Triska, P., Soares, P., Patin, E., Fernandes, V., Cerny, V., and Pereira, L. (2015). Extensive Admixture and Selective Pressure Across the Sahel Belt. *Genome Biol. Evol.* *7*, 3484–3495.
  35. Deng, L., Ruiz-Linares, A., Xu, S., and Wang, S. (2016). Ancestry variation and footprints of natural selection along the genome in Latin American populations. *Sci. Rep.* *6*, 21766.
  36. Jin, W., Xu, S., Wang, H., Yu, Y., Shen, Y., Wu, B., and Jin, L. (2012). Genome-wide detection of natural selection in African Americans pre- and post-admixture. *Genome Res.* *22*, 519–527.
  37. Norris, E.T., Rishishwar, L., Chande, A.T., Conley, A.B., Ye, K., Valderrama-Aguirre, A., and Jordan, I.K. (2020). Admixture-enabled selection for rapid adaptive evolution in the Americas. *Genome Biol.* *21*, 29.
  38. Tang, H., Choudhry, S., Mei, R., Morgan, M., Rodriguez-Cintron, W., Burchard, E.G., and Risch, N.J. (2007). Recent genetic selection in the ancestral admixture of Puerto Ricans. *Am. J. Hum. Genet.* *81*, 626–633.
  39. Miller, L.H., Mason, S.J., Clyde, D.F., and McGinniss, M.H. (1976). The resistance factor to *Plasmodium vivax* in blacks. The Duffy-blood-group genotype, FyFy. *N. Engl. J. Med.* *295*, 302–304.
  40. Tournamille, C., Colin, Y., Cartron, J.P., and Le Van Kim, C. (1995). Disruption of a GATA motif in the Duffy gene promoter abolishes erythroid gene expression in Duffy-negative individuals. *Nat. Genet.* *10*, 224–228.
  41. Mathieson, I., Lazaridis, I., Rohland, N., Mallick, S., Patterson, N., Roodenberg, S.A., Harney, E., Stewardson, K., Fernandes, D., Novak, M., et al. (2015). Genome-wide patterns of selection in 230 ancient Eurasians. *Nature* *528*, 499–503.
  42. Long, J.C. (1991). The genetic structure of admixed populations. *Genetics* *127*, 417–428.
  43. Price, A.L., Weale, M.E., Patterson, N., Myers, S.R., Need, A.C., Shianna, K.V., Ge, D., Rotter, J.I., Torres, E., Taylor, K.D., et al. (2008). Long-range LD can confound genome scans in admixed populations. *Am. J. Hum. Genet.* *83*, 132–135, author reply 135–139.
  44. Pasaniuc, B., Sankararaman, S., Torgerson, D.G., Gignoux, C., Zaitlen, N., Eng, C., Rodriguez-Cintron, W., Chapela, R., Ford, J.G., Avila, P.C., et al. (2013). Analysis of Latino populations from GALA and MEC studies reveals genomic loci

- with biased local ancestry estimation. *Bioinformatics* 29, 1407–1415.
45. Haller, B.C., and Messer, P.W. (2019). SLiM 3: Forward Genetic Simulations Beyond the Wright-Fisher Model. *Mol. Biol. Evol.* 36, 632–637.
  46. Auton, A., Brooks, L.D., Durbin, R.M., Garrison, E.P., Kang, H.M., Korbel, J.O., Marchini, J.L., McCarthy, S., McVean, G.A., Abecasis, G.R.; and 1000 Genomes Project Consortium (2015). A global reference for human genetic variation. *Nature* 526, 68–74.
  47. Francioli, L.C., Polak, P.P., Koren, A., Menelaou, A., Chun, S., Renkens, I., van Duijn, C.M., Swertz, M., Wijmenga, C., van Ommen, G., et al. (2015). Genome-wide patterns and properties of de novo mutations in humans. *Nat. Genet.* 47, 822–826.
  48. Lohmueller, K.E., Albrechtsen, A., Li, Y., Kim, S.Y., Korneliusen, T., Vinckenbosch, N., Tian, G., Huerta-Sanchez, E., Feder, A.F., Grarup, N., et al. (2011). Natural selection affects multiple aspects of genetic variation at putatively neutral sites across the human genome. *PLoS Genet.* 7, e1002326.
  49. Boyko, A.R., Williamson, S.H., Indap, A.R., Degenhardt, J.D., Hernandez, R.D., Lohmueller, K.E., Adams, M.D., Schmidt, S., Sninsky, J.J., Sunyaev, S.R., et al. (2008). Assessing the evolutionary impact of amino acid mutations in the human genome. *PLoS Genet.* 4, e1000083.
  50. Haller, B.C., and Messer, P.W. (2016). SLiM: An Evolutionary Simulation Framework. [http://benhaller.com/slim/SLiM\\_Manual.pdf](http://benhaller.com/slim/SLiM_Manual.pdf).
  51. Choin, J., Mendoza-Revilla, J., Arauna, L.R., Cuadros-Espinoza, S., Cassar, O., Larena, M., Ko, A.M.-S., Harmant, C., Laurent, R., Verdu, P., et al. (2021). Genomic insights into population history and biological adaptation in Oceania. *Nature* 592, 583–589.
  52. Bernstein, F. (1931). Die geographische Verteilung der Blutgruppen und ihre anthropologische Bedeutung. In *Comitato Weak Representations of the Data. Italiano per Lo Studio Dei Problemi Della Popolazione* (Roma: Istituto Poligrafico dello Stato), pp. 227–243.
  53. Charlesworth, B., and Charlesworth, D. (2010). *Elements of Evolutionary Genetics* (W. H. Freeman).
  54. Alexander, D.H., Novembre, J., and Lange, K. (2009). Fast model-based estimation of ancestry in unrelated individuals. *Genome Res.* 19, 1655–1664.
  55. Workman, P.L., Blumberg, B.S., and Cooper, A.J. (1963). Selection, Gene Migration and Polymorphic Stability in a U. S. White and Negro Population. *Am. J. Hum. Genet.* 15, 429–437.
  56. Reed, T.E. (1969). Caucasian genes in American Negroes. *Science* 165, 762–768.
  57. Cavalli-Sforza, L.L., and Bodmer, W.F. (1971). *The Genetics of Human Populations* (Freeman & Co).
  58. Maples, B.K., Gravel, S., Kenny, E.E., and Bustamante, C.D. (2013). RfMix: a discriminative modeling approach for rapid and robust local-ancestry inference. *Am. J. Hum. Genet.* 93, 278–288.
  59. Delaneau, O., Zagury, J.-F., Robinson, M.R., Marchini, J.L., and Dermitzakis, E.T. (2019). Accurate, scalable and integrative haplotype estimation. *Nat. Commun.* 10, 5436.
  60. Stephan, W., Wiehe, T.H.E., and Lenz, M.W. (1992). The effect of strongly selected substitutions on neutral polymorphism: Analytical results based on diffusion theory. *Theor. Popul. Biol.* 41, 237–254.
  61. Chang, C.C., Chow, C.C., Tellier, L.C., Vattikuti, S., Purcell, S.M., and Lee, J.J. (2015). Second-generation PLINK: rising to the challenge of larger and richer datasets. *Gigascience* 4, 7.
  62. Manichaikul, A., Mychaleckyj, J.C., Rich, S.S., Daly, K., Sale, M., and Chen, W.-M. (2010). Robust relationship inference in genome-wide association studies. *Bioinformatics* 26, 2867–2873.
  63. Petr, M., Vernot, B., and Kelso, J. (2019). admixr-R package for reproducible analyses using ADMIXTOOLS. *Bioinformatics* 35, 3194–3195.
  64. Fisher, R.A. (1925). *Statistical Methods for Research Workers* (Edinburgh: Oliver and Boyd).
  65. Ghousaini, M., Mountjoy, E., Carmona, M., Peat, G., Schmidt, E.M., Hercules, A., Fumis, L., Miranda, A., Carvalho-Silva, D., Buniello, A., et al. (2021). Open Targets Genetics: systematic identification of trait-associated genes using large-scale genetics and functional genomics. *Nucleic Acids Res.* 49 (D1), D1311–D1320.
  66. Peter, B.M., Huerta-Sanchez, E., and Nielsen, R. (2012). Distinguishing between selective sweeps from standing variation and from a de novo mutation. *PLoS Genet.* 8, e1003011.
  67. Baharian, S., Barakatt, M., Gignoux, C.R., Shringarpure, S., Errington, J., Blot, W.J., Bustamante, C.D., Kenny, E.E., Williams, S.M., Aldrich, M.C., and Gravel, S. (2016). The Great Migration and African-American Genomic Diversity. *PLoS Genet.* 12, e1006059.
  68. Fortes-Lima, C.A., Laurent, R., Thouzeau, V., Toupance, B., and Verdu, P. (2021). Complex genetic admixture histories reconstructed with Approximate Bayesian Computation. *Mol. Ecol. Resour.* 21, 1098–1117.
  69. Malaspina, A.-S., Westaway, M.C., Muller, C., Sousa, V.C., Lao, O., Alves, I., Bergström, A., Athanasiadis, G., Cheng, J.Y., Crawford, J.E., et al. (2016). A genomic history of Aboriginal Australia. *Nature* 538, 207–214.
  70. Medina, P., Thornlow, B., Nielsen, R., and Corbett-Detig, R. (2018). Estimating the Timing of Multiple Admixture Pulses During Local Ancestry Inference. *Genetics* 210, 1089–1107.
  71. Pickrell, J.K., Patterson, N., Loh, P.-R., Lipson, M., Berger, B., Stoneking, M., Pakendorf, B., and Reich, D. (2014). Ancient west Eurasian ancestry in southern and eastern Africa. *Proc. Natl. Acad. Sci. USA* 111, 2632–2637.
  72. Molinaro, L., Marnetto, D., Mondal, M., Ongaro, L., Yelmen, B., Lawson, D.J., Montinaro, F., and Pagani, L. (2021). A Chromosome-Painting-Based Pipeline to Infer Local Ancestry under Limited Source Availability. *Genome Biol. Evol.* 13, evab025.
  73. Tajima, F. (1989). Statistical method for testing the neutral mutation hypothesis by DNA polymorphism. *Genetics* 123, 585–595.
  74. Tajima, F. (1989). The effect of change in population size on DNA polymorphism. *Genetics* 123, 597–601.
  75. Wakeley, J., and Aliacar, N. (2001). Gene genealogies in a metapopulation. *Genetics* 159, 893–905.
  76. Fu, Y.X., and Li, W.H. (1993). Statistical tests of neutrality of mutations. *Genetics* 133, 693–709.
  77. Przeworski, M. (2002). The signature of positive selection at randomly chosen loci. *Genetics* 160, 1179–1189.
  78. Coop, G., Pickrell, J.K., Novembre, J., Kudaravalli, S., Li, J., Absher, D., Myers, R.M., Cavalli-Sforza, L.L., Feldman, M.W., and Pritchard, J.K. (2009). The role of geography in human adaptation. *PLoS Genet.* 5, e1000500.



79. Ferrer-Admetlla, A., Liang, M., Korneliussen, T., and Nielsen, R. (2014). On detecting incomplete soft or hard selective sweeps using haplotype structure. *Mol. Biol. Evol.* *31*, 1275–1291.
80. Dias-Alves, T., Mairal, J., and Blum, M.G.B. (2018). Loter: A Software Package to Infer Local Ancestry for a Wide Range of Species. *Mol. Biol. Evol.* *35*, 2318–2326.
81. Meyer, D., C Aguiar, V.R., Bitarello, B.D.C., C Brandt, D.Y., and Nunes, K. (2018). A genomic perspective on HLA evolution. *Immunogenetics* *70*, 5–27.
82. Vicente, M., Prieňodová, E., Diallo, I., Podgorná, E., Poloni, E.S., Černý, V., and Schlebusch, C.M. (2019). Population history and genetic adaptation of the Fulani nomads: inferences from genome-wide data and the lactase persistence trait. *BMC Genomics* *20*, 915.
83. Genovese, G., Friedman, D.J., Ross, M.D., Lecordier, L., Uzureau, P., Freedman, B.I., Bowden, D.W., Langefeld, C.D., Oleksyk, T.K., Uscinski Knob, A.L., et al. (2010). Association of trypanolytic ApoL1 variants with kidney disease in African Americans. *Science* *329*, 841–845.
84. Ruby, M.A., Riedl, I., Massart, J., Åhlin, M., and Zierath, J.R. (2017). Protein kinase N2 regulates AMP kinase signaling and insulin responsiveness of glucose metabolism in skeletal muscle. *Am. J. Physiol. Endocrinol. Metab.* *313*, E483–E491.
85. Meng, J., Yao, Z., He, Y., Zhang, R., Zhang, Y., Yao, X., Yang, H., Chen, L., Zhang, Z., Zhang, H., et al. (2017). ARRDC4 regulates enterovirus 71-induced innate immune response by promoting K63 polyubiquitination of MDA5 through TRIM65. *Cell Death Dis.* *8*, e2866.
86. Wit, J.M., and Walenkamp, M.J. (2013). Role of insulin-like growth factors in growth, development and feeding. *World Rev. Nutr. Diet.* *106*, 60–65.
87. Warrington, N.M., Beaumont, R.N., Horikoshi, M., Day, F.R., Helgeland, Ø., Laurin, C., Bacelis, J., Peng, S., Hao, K., Feenstra, B., et al. (2019). Maternal and fetal genetic effects on birth weight and their relevance to cardio-metabolic risk factors. *Nat. Genet.* *51*, 804–814.
88. Chimusa, E.R., Zaitlen, N., Daya, M., Möller, M., van Helden, P.D., Mulder, N.J., Price, A.L., and Hoal, E.G. (2014). Genome-wide association study of ancestry-specific TB risk in the South African Coloured population. *Hum. Mol. Genet.* *23*, 796–809.
89. Vernot, B., Tucci, S., Kelso, J., Schraiber, J.G., Wolf, A.B., Gittelmann, R.M., Dannemann, M., Grote, S., McCoy, R.C., Norton, H., et al. (2016). Excavating Neandertal and Denisovan DNA from the genomes of Melanesian individuals. *Science* *352*, 235–239.
90. Gittelmann, R.M., Schraiber, J.G., Vernot, B., Mikacenic, C., Wurfel, M.M., and Akey, J.M. (2016). Archaic Hominin Admixture Facilitated Adaptation to Out-of-Africa Environments. *Curr. Biol.* *26*, 3375–3382.
91. Jacobs, G.S., Hudjashov, G., Saag, L., Kusuma, P., Darusalam, C.C., Lawson, D.J., Mondal, M., Pagani, L., Ricaut, F.-X., Stoneking, M., et al. (2019). Multiple Deeply Divergent Denisovan Ancestries in Papuans. *Cell* *177*, 1010–1021.e32.
92. Zammit, N.W., Siggs, O.M., Gray, P.E., Horikawa, K., Langley, D.B., Walters, S.N., Daley, S.R., Loetsch, C., Warren, J., Yap, J.Y., et al. (2019). Denisovan, modern human and mouse TNFAIP3 alleles tune A20 phosphorylation and immunity. *Nat. Immunol.* *20*, 1299–1310.
93. Toyama, K.S., Crochet, P.-A., and Leblois, R. (2020). Sampling schemes and drift can bias admixture proportions inferred by structure. *Mol. Ecol. Resour.* *20*, 1769–1785.
94. Ko, W.-Y., Rajan, P., Gomez, F., Scheinfeldt, L., An, P., Winkler, C.A., Froment, A., Nyambo, T.B., Omar, S.A., Wambebe, C., et al. (2013). Identifying Darwinian selection acting on different human APOL1 variants among diverse African populations. *Am. J. Hum. Genet.* *93*, 54–66.
95. Limou, S., Nelson, G.W., Lecordier, L., An, P., O’huigin, C.S., David, V.A., Binns-Roemer, E.A., Guiblet, W.M., Oleksyk, T.K., Pays, E., et al. (2015). Sequencing rare and common APOL1 coding variants to determine kidney disease risk. *Kidney Int.* *88*, 754–763.
96. Franco, J.R., Simarro, P.P., Diarra, A., and Jannin, J.G. (2014). Epidemiology of human African trypanosomiasis. *Clin. Epidemiol.* *6*, 257–275.
97. Hamblin, M.T., and Di Rienzo, A. (2000). Detection of the signature of natural selection in humans: evidence from the Duffy blood group locus. *Am. J. Hum. Genet.* *66*, 1669–1679.
98. Hamblin, M.T., Thompson, E.E., and Di Rienzo, A. (2002). Complex signatures of natural selection at the Duffy blood group locus. *Am. J. Hum. Genet.* *70*, 369–383.
99. McManus, K.F., Taravella, A.M., Henn, B.M., Bustamante, C.D., Sikora, M., and Cornejo, O.E. (2017). Population genetic analysis of the *DARC* locus (Duffy) reveals adaptation from standing variation associated with malaria resistance in humans. *PLoS Genet.* *13*, e1006560.
100. Tishkoff, S.A., Reed, F.A., Ranciaro, A., Voight, B.F., Babbitt, C.C., Silverman, J.S., Powell, K., Mortensen, H.M., Hirbo, J.B., Osman, M., et al. (2007). Convergent adaptation of human lactase persistence in Africa and Europe. *Nat. Genet.* *39*, 31–40.
101. Bersaglieri, T., Sabeti, P.C., Patterson, N., Vanderploeg, T., Schaffner, S.F., Drake, J.A., Rhodes, M., Reich, D.E., and Hirschhorn, J.N. (2004). Genetic signatures of strong recent positive selection at the lactase gene. *Am. J. Hum. Genet.* *74*, 1111–1120.
102. Livingstone, F.B. (1984). The Duffy blood groups, *vivax* malaria, and malaria selection in human populations: a review. *Hum. Biol.* *56*, 413–425.
103. Ménard, D., Barnadas, C., Bouchier, C., Henry-Halldin, C., Gray, L.R., Ratsimbasoa, A., Thonier, V., Carod, J.-F., Domarle, O., Colin, Y., et al. (2010). *Plasmodium vivax* clinical malaria is commonly observed in Duffy-negative Malagasy people. *Proc. Natl. Acad. Sci. USA* *107*, 5967–5971.
104. Popovici, J., Roesch, C., and Rougeron, V. (2020). The enigmatic mechanisms by which *Plasmodium vivax* infects Duffy-negative individuals. *PLoS Pathog.* *16*, e1008258.
105. Battle, K.E., Lucas, T.C.D., Nguyen, M., Howes, R.E., Nandi, A.K., Twohig, K.A., Pfeffer, D.A., Cameron, E., Rao, P.C., Casey, D., et al. (2019). Mapping the global endemicity and clinical burden of *Plasmodium vivax*, 2000–17: a spatial and temporal modelling study. *Lancet* *394*, 332–343.
106. Guan, Y. (2014). Detecting structure of haplotypes and local ancestry. *Genetics* *196*, 625–642.
107. Sugden, L.A., Atkinson, E.G., Fischer, A.P., Rong, S., Henn, B.M., and Ramachandran, S. (2018). Localization of adaptive variants in human genomes using averaged one-dependence estimation. *Nat. Commun.* *9*, 703.
108. Sella, G., and Barton, N.H. (2019). Thinking About the Evolution of Complex Traits in the Era of Genome-Wide

- Association Studies. *Annu. Rev. Genomics Hum. Genet.* 20, 461–493.
109. Racimo, F., Berg, J.J., and Pickrell, J.K. (2018). Detecting Polygenic Adaptation in Admixture Graphs. *Genetics* 208, 1565–1584.
110. Dehasque, M., Ávila-Arcos, M.C., Díez-Del-Molino, D., Fumagalli, M., Guschanski, K., Lorenzen, E.D., Malaspina, A.-S., Marques-Bonet, T., Martin, M.D., Murray, G.G.R., et al. (2020). Inference of natural selection from ancient DNA. *Evol. Lett.* 4, 94–108.

**The American Journal of Human Genetics, Volume 109**

**Supplemental information**

**The genomic signatures of natural selection  
in admixed human populations**

**Sebastian Cuadros-Espinoza, Guillaume Laval, Lluís Quintana-Murci, and Etienne Patin**

## Supplementary Figures

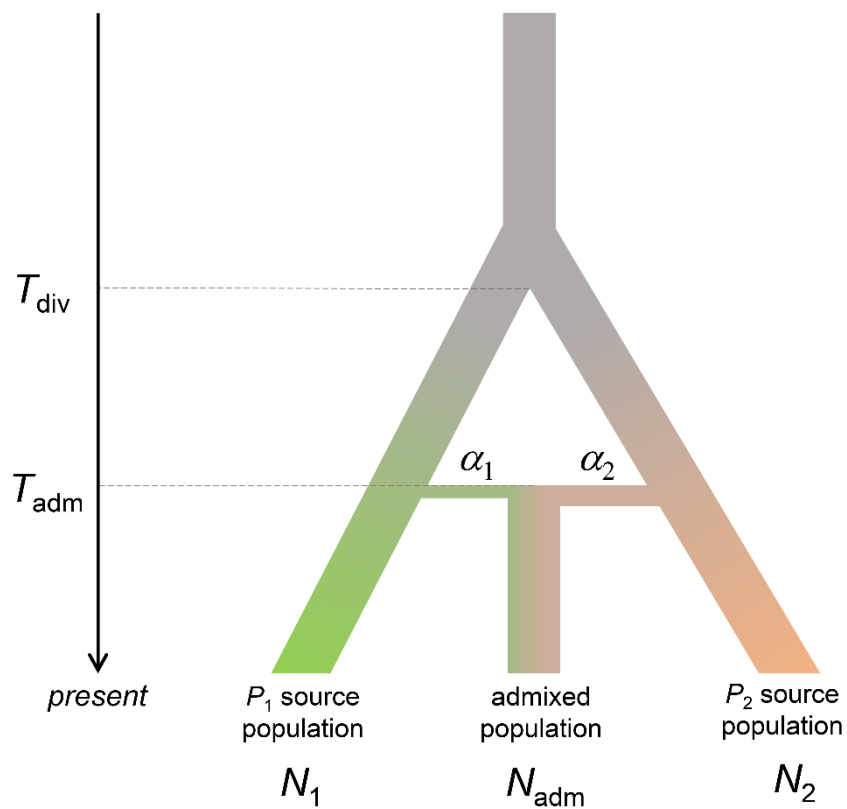

**Figure S1. The simulated single-pulse admixture model.**

The admixed population originates from admixture between two source populations, referred to as  $P_1$  and  $P_2$ .  $P_1$  and  $P_2$  contribute  $\alpha_1$  and  $\alpha_2$  admixture proportions to the admixed population, with  $\alpha_1 + \alpha_2 = 1$ .  $P_1$  and  $P_2$  diverge  $T_{\text{div}}$  generations ago and the admixture event occurs  $T_{\text{adm}}$  generations ago. The population sizes of the admixed population and of  $P_1$  and  $P_2$  source populations are  $N_{\text{adm}}$ ,  $N_1$  and  $N_2$ , respectively.

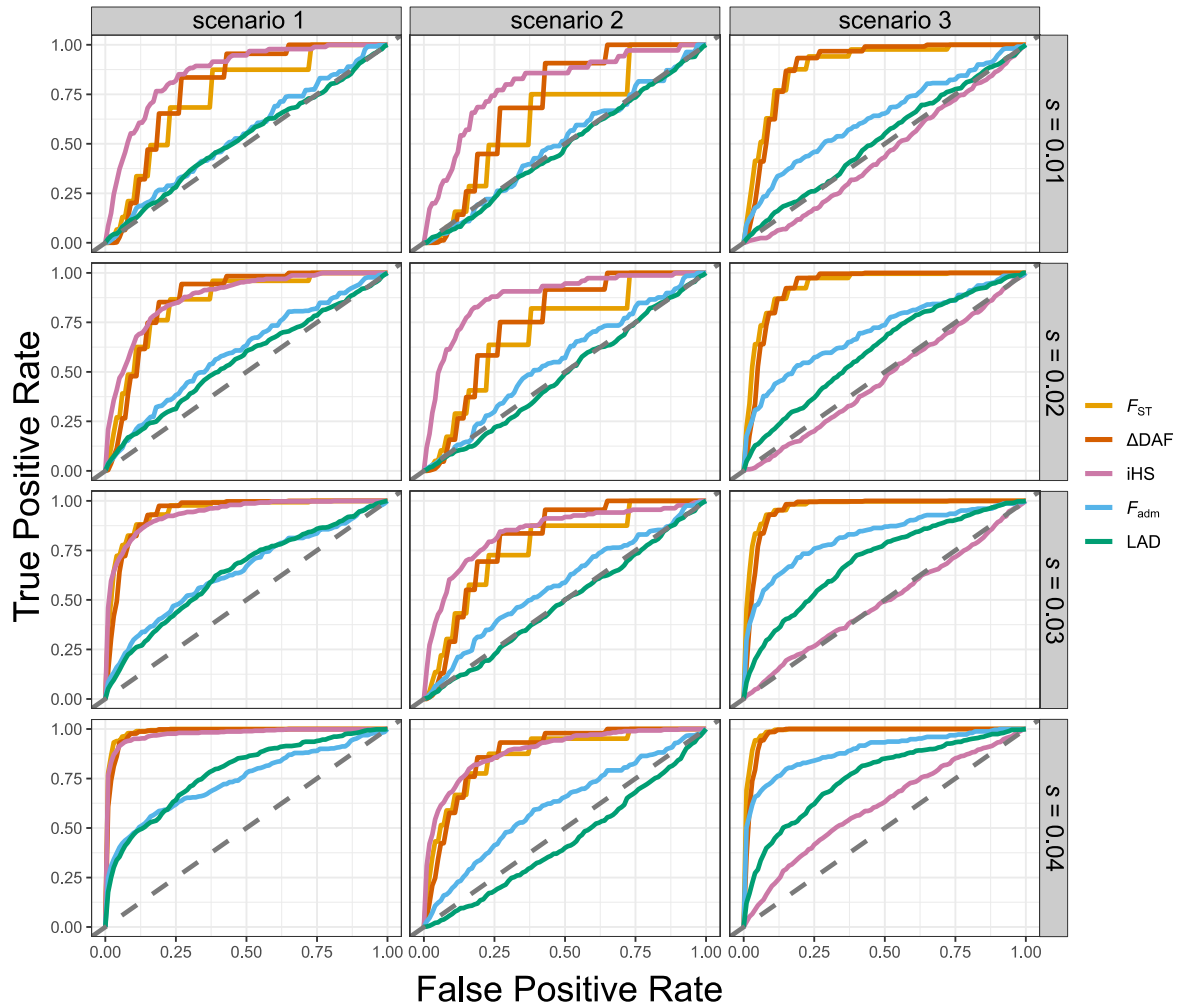

**Figure S2. Performance of neutrality statistics under different scenarios of admixture with selection, assuming different selection coefficients.**

Receiver operating characteristic (ROC) curves comparing the performance of the classic neutrality statistics  $F_{ST}$ ,  $\Delta DAF$  and  $iHS$  and the admixture-specific statistics  $F_{adm}$  and  $LAD$ , across the 3 explored admixture with selection scenarios, with varying selection coefficients  $s \in \{0.01, 0.02, 0.03, 0.04\}$ .

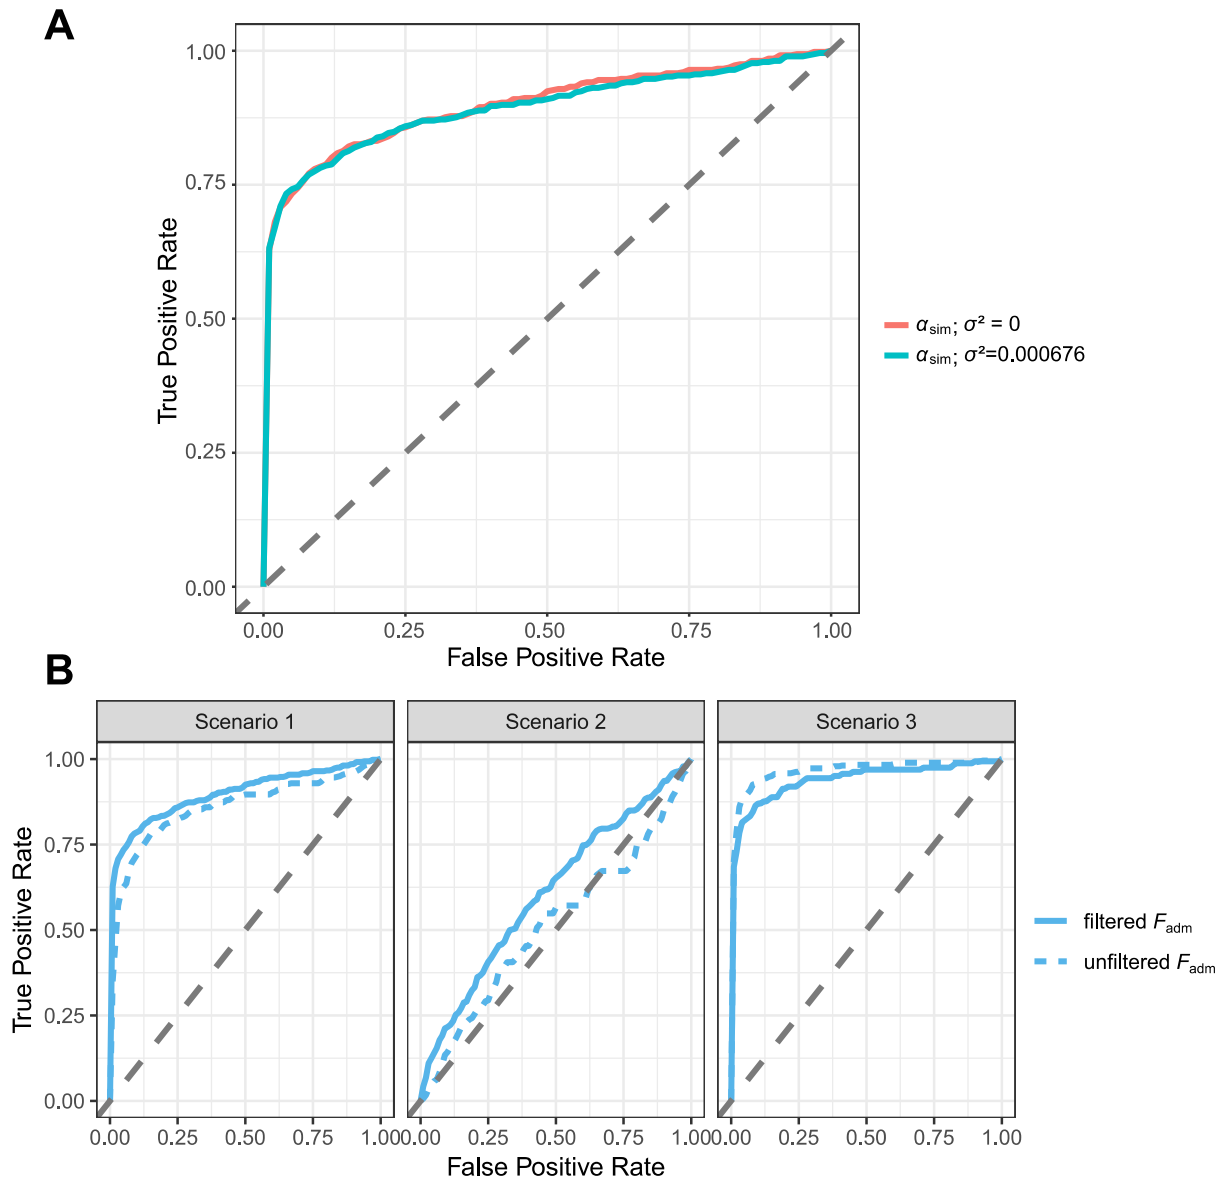

**Figure S3. Performance of  $F_{\text{adm}}$  when using simulated admixture proportions with error and when applying or not an allele frequency filter.**

(A) Receiver operating characteristic (ROC) curves comparing the performance of  $F_{\text{adm}}$  when using the simulated admixture proportions  $\alpha_{\text{sim}}$  or  $\alpha$  sampled from a normal distribution  $\mathcal{N}(\mu = \alpha_{\text{sim}}, \sigma^2 = 0.026^2 = 0.000676)$ , 0.026 being the highest root-mean-square deviation of the ADMIXTURE estimation.<sup>54</sup>

(B) Receiver operating characteristic (ROC) curves comparing the performance of  $F_{\text{adm}}$ , with and without applying an allele frequency filter based on the source populations (see Material & Methods), under the 3 explored admixture with selection scenarios.

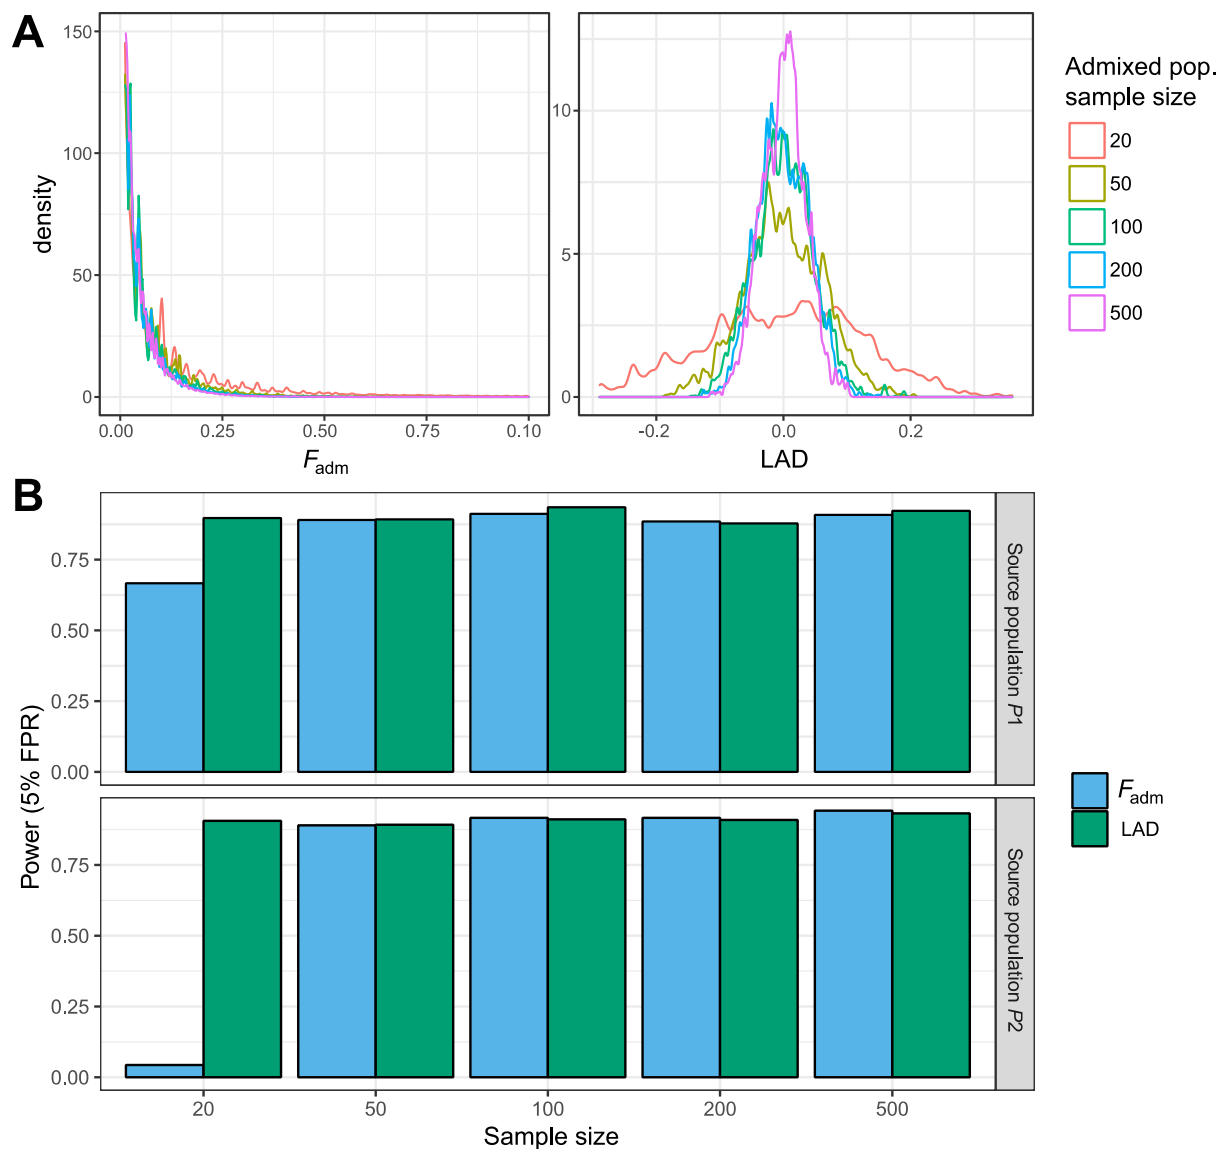

**Figure S4. Effects of sample size on the power of  $F_{adm}$  and LAD statistics.**

(A) Distributions under the null hypothesis (no positive selection) of  $F_{adm}$  and LAD, with varying sample sizes for the admixed population.

(B) Effect of the sample size of the source populations on the detection power of  $F_{adm}$  and LAD.

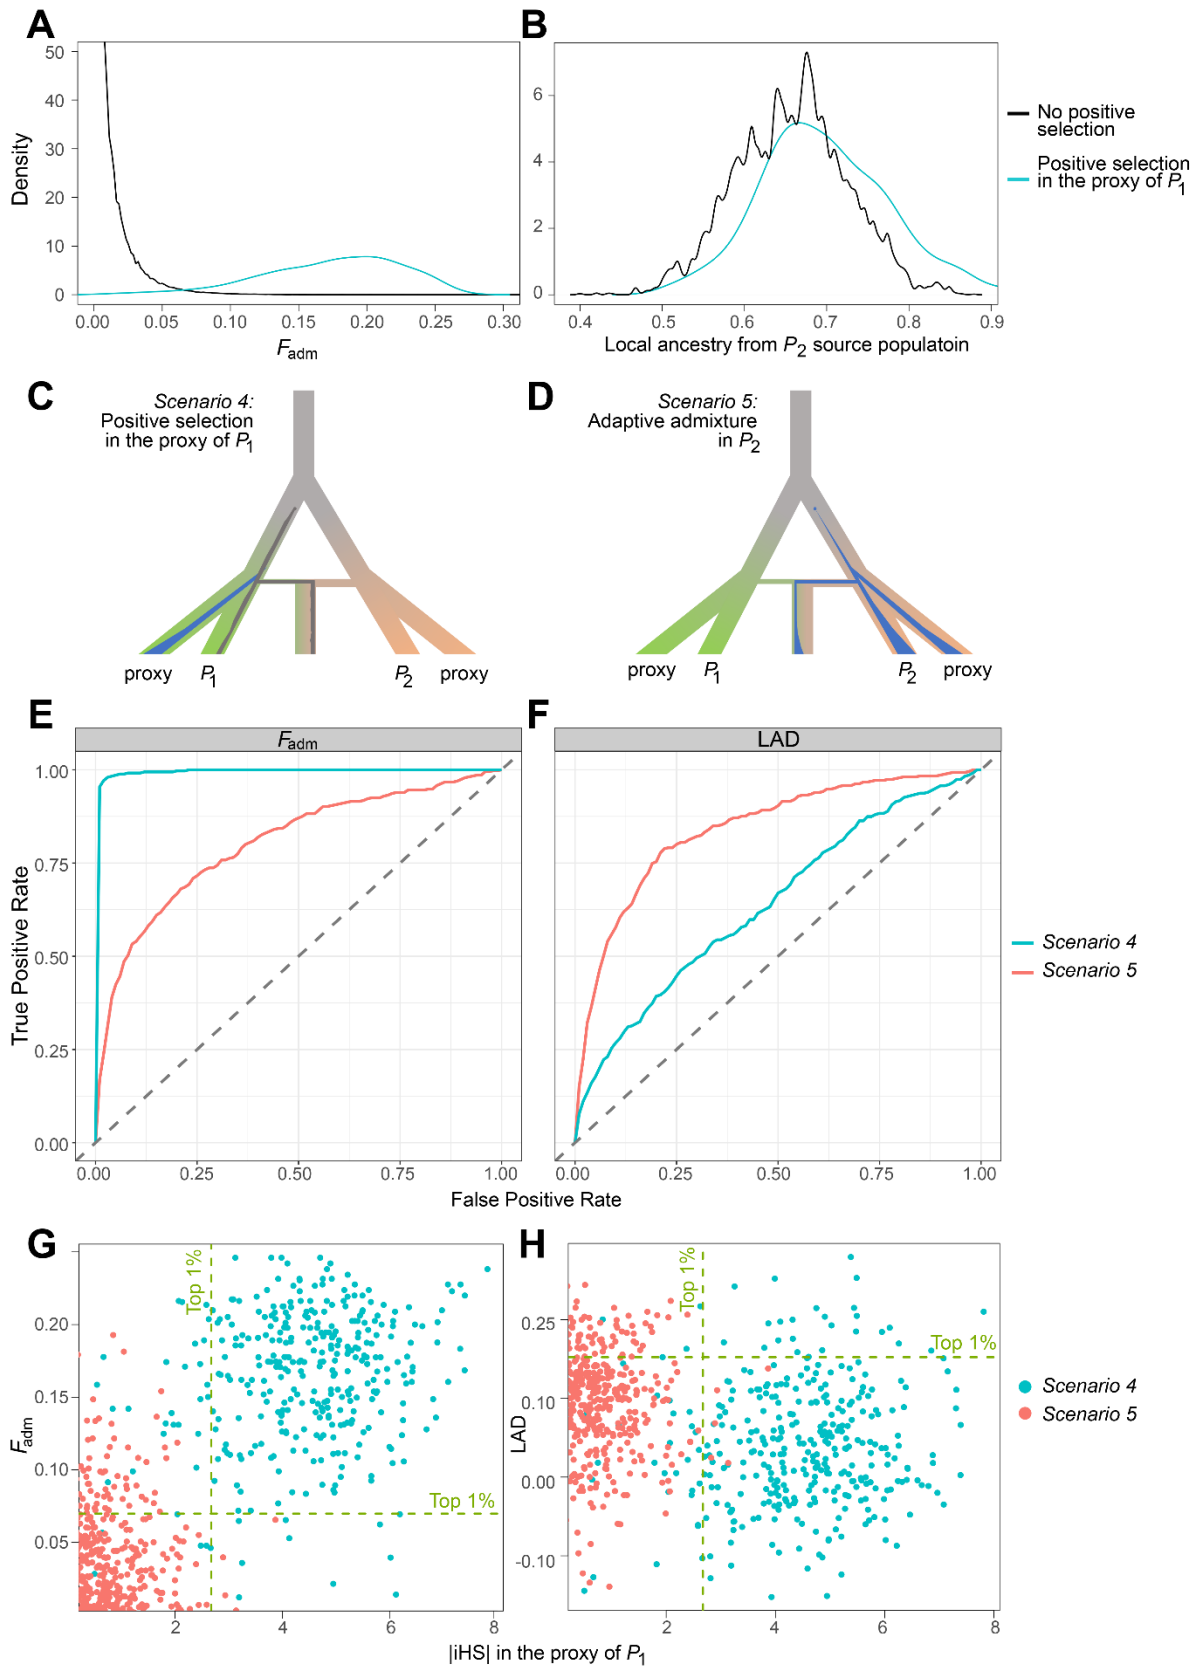

**Figure S5. False positive signals due to selection in the proxy source population.**

(A) Distributions of  $F_{adm}$  when there is or not positive selection in the proxy of the  $P_1$  source population.



(B) Distributions of local ancestry in the admixed population from the  $P_2$  source population, when there is or not positive selection in the proxy source population.

(C) The simulated model, assuming positive selection only in the proxy of the  $P_1$  source population.

(D) The simulated model, assuming adaptive admixture in the  $P_2$  source population. The scenario was simulated for comparison purposes.

(C-D) The blue and gray points indicate the appearance of a new beneficial and neutral mutations, respectively. The blue and gray areas indicate changes in frequency of the beneficial and neutral mutation, respectively.

(E-F) ROC curves for (E)  $F_{\text{adm}}$  and (F) LAD comparing the scenario where there is positive selection in the proxy of  $P_1$  only (*scenario 4*; Figure S5C) and the scenario where there is a adaptive admixture in  $P_2$  (*scenario 5*; Figure S5D).

(G–H) Absolute iHS values for the selected mutation in the proxy of the  $P_1$  source population vs. (G)  $F_{\text{adm}}$  and (H) LAD values in the admixed population, when there is selection in this proxy of  $P_1$  only (*scenario 4*; Figure S5C), or when there is adaptive admixture in  $P_2$  (*scenario 5*; Figure S5D). Dashed green lines represent the 99<sup>th</sup> percentiles (based on the null model simulations) for absolute iHS (vertical) and  $F_{\text{adm}}$  or LAD (horizontal). Excluding values that are above the absolute iHS 99<sup>th</sup> percentile excludes approximately 90% of the extreme  $F_{\text{adm}}$  and LAD values under selection in this proxy of  $P_1$  only (*scenario 4*) but, importantly, does not exclude any extreme value generated under the true adaptive admixture scenario (*scenario 5*).

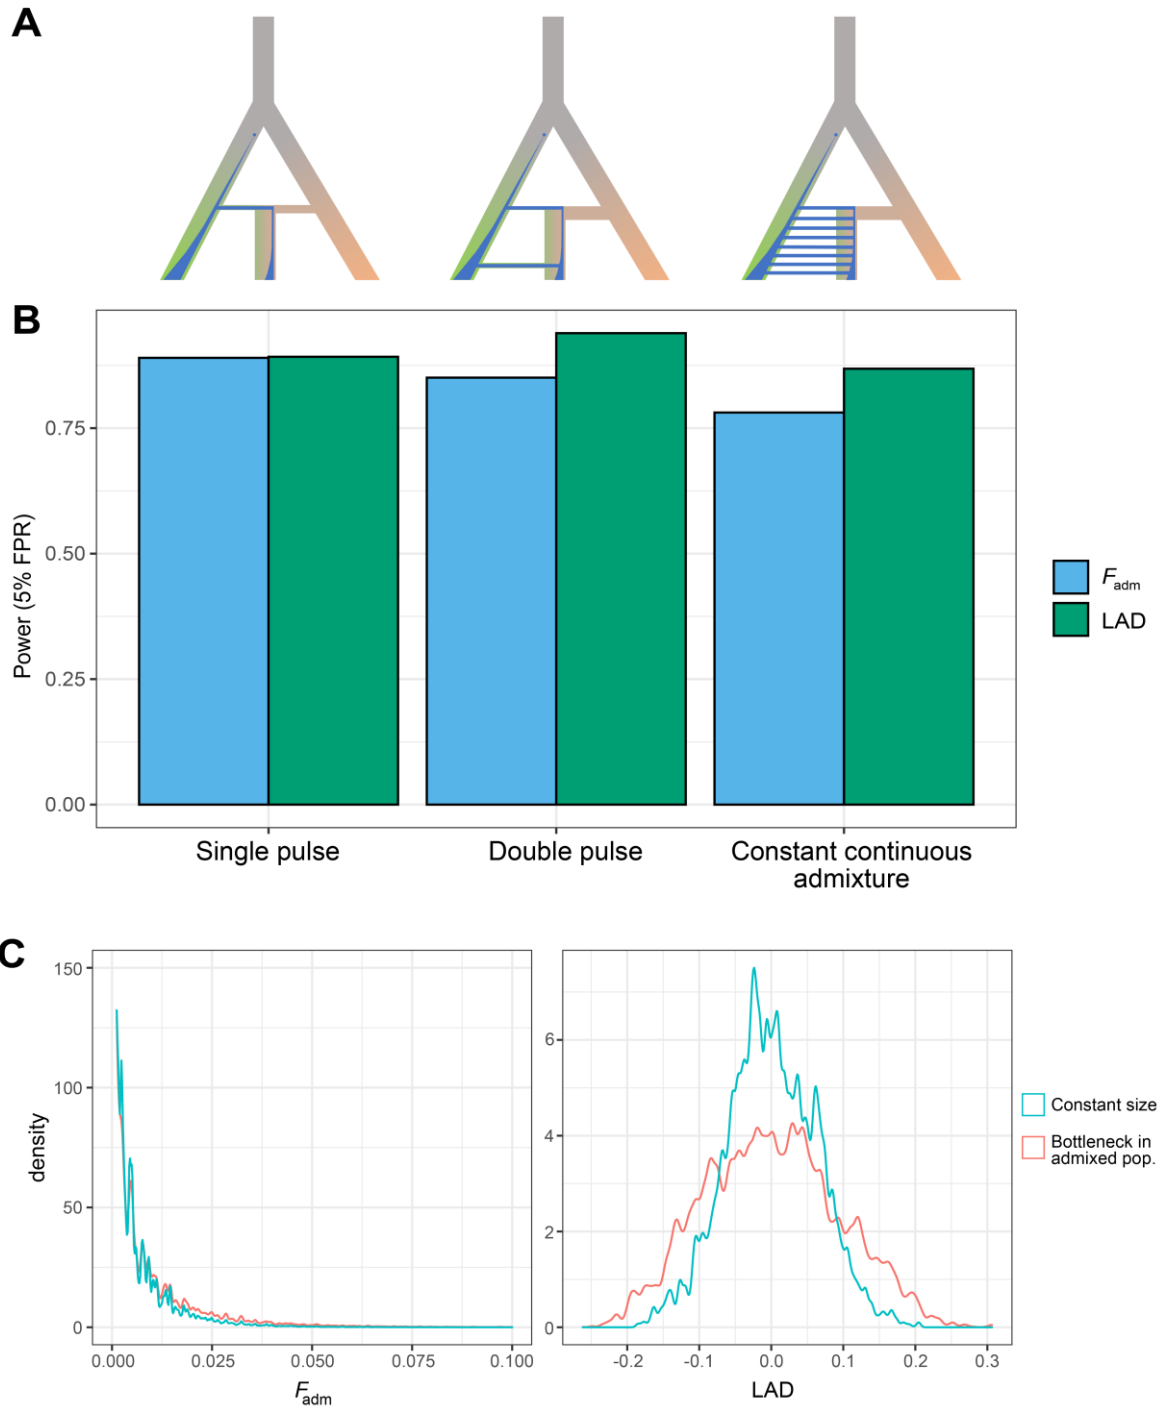

**Figure S6. Effects of complex admixture and non-stationary demography on the power to detect adaptive admixture.**

(A) The different simulated admixture models: a single pulse admixture model, a double pulse admixture model and a constant continuous admixture model. For these scenarios to be comparable, we set the sum of the admixture proportions contributed by each pulse to be equal to  $\alpha_1 = 35\%$ , and the average of the admixture dates to be equal to 70 generations (Material and Methods).

(B) Detection power of  $F_{\text{adm}}$  and LAD under the three different admixture scenarios (FPR = 5%; Material & Methods).

(C) Distributions of  $F_{\text{adm}}$  and LAD under the null hypothesis (no positive selection), with or without a 10-fold bottleneck in the admixed population.

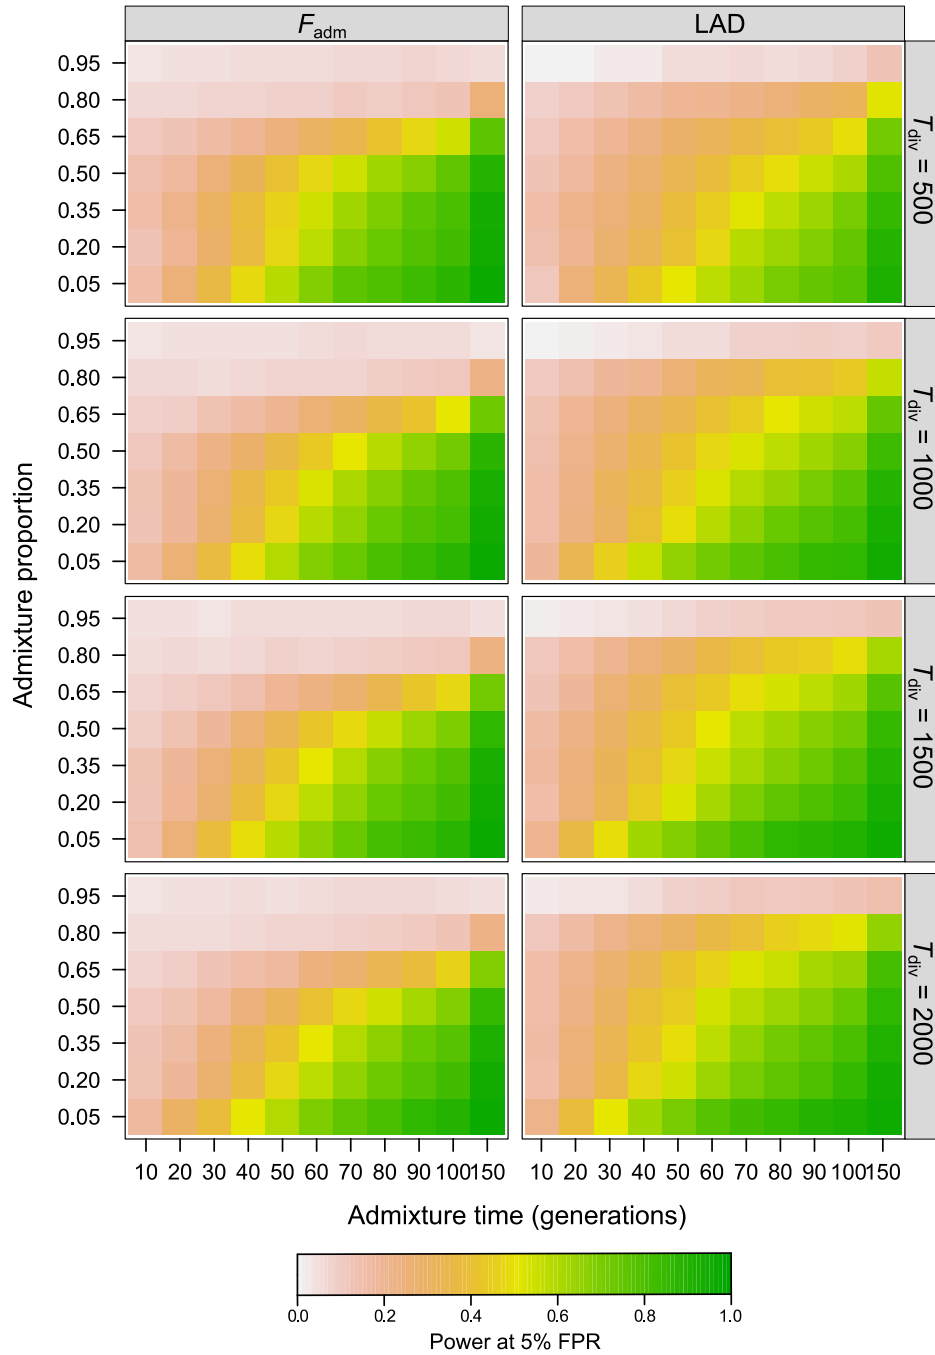

**Figure S7. Effects of the divergence time between source populations on the power to detect adaptive admixture.**

Effects on the detection power of  $F_{adm}$  and LAD of admixture time  $T_{adm}$ , admixture proportion  $\alpha$  and the divergence time between source populations  $T_{div}$ . Colour indicates average detection power for a FPR = 5% threshold, across combinations of the remaining parameters. Because  $T_{div}$  is the upper limit of the time at which the beneficial mutation appears  $T_{mut}$ , we assumed for these simulations  $T_{mut} < 500$  generations and  $s \in \{0.05; 0.10\}$ .

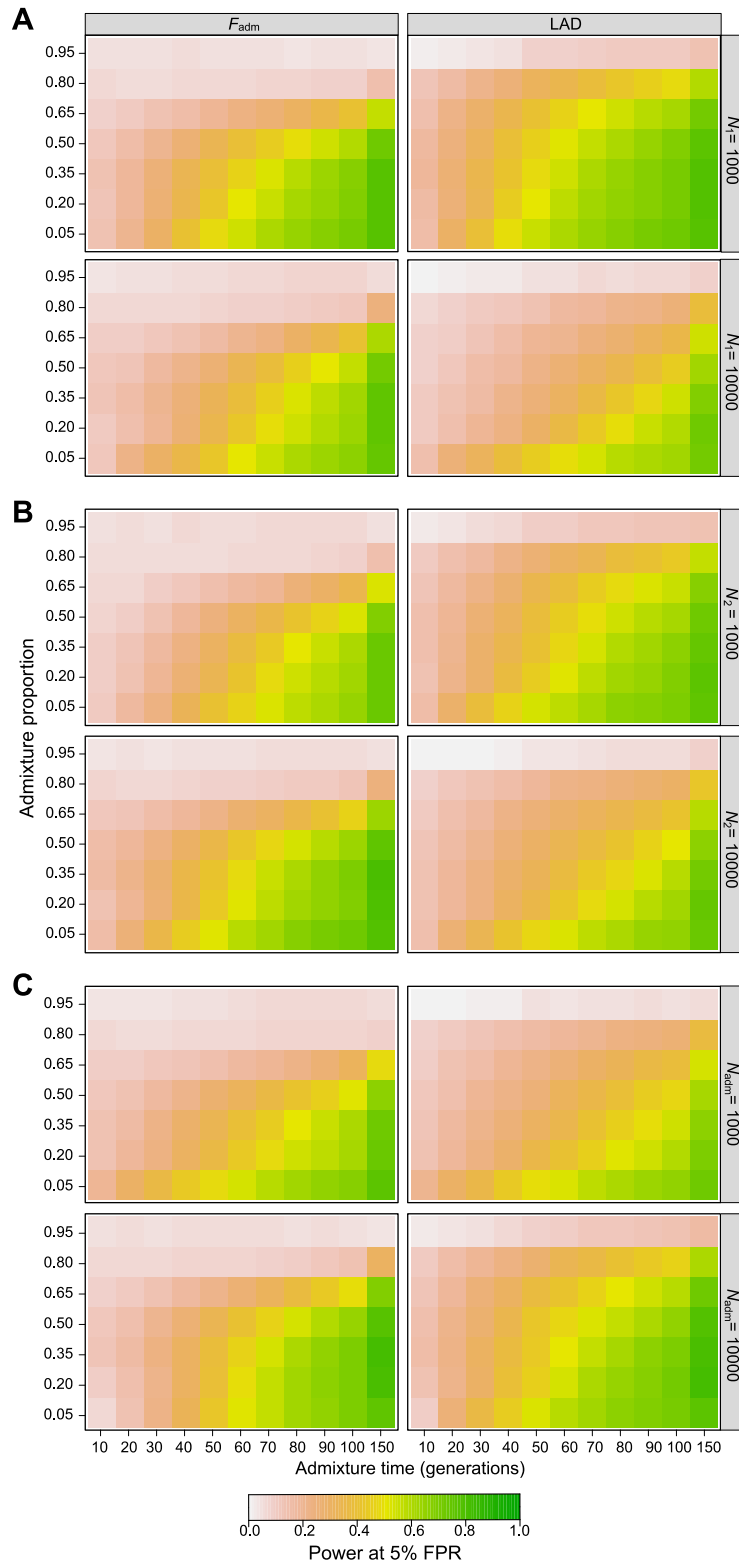

**Figure S8. Effects of population sizes on the power to detect adaptive admixture.**

Effects on the detection power of  $F_{adm}$  and LAD of admixture time  $T_{adm}$ , admixture proportion  $\alpha$  and (A)  $N_1$ , (B)  $N_2$  and (C)  $N_{adm}$ , the population sizes of source population  $P_1$ , source population  $P_2$  and the admixed population, respectively (Figure S1). Colour indicates average detection power for a FPR = 5% threshold, across combinations of the remaining parameters.

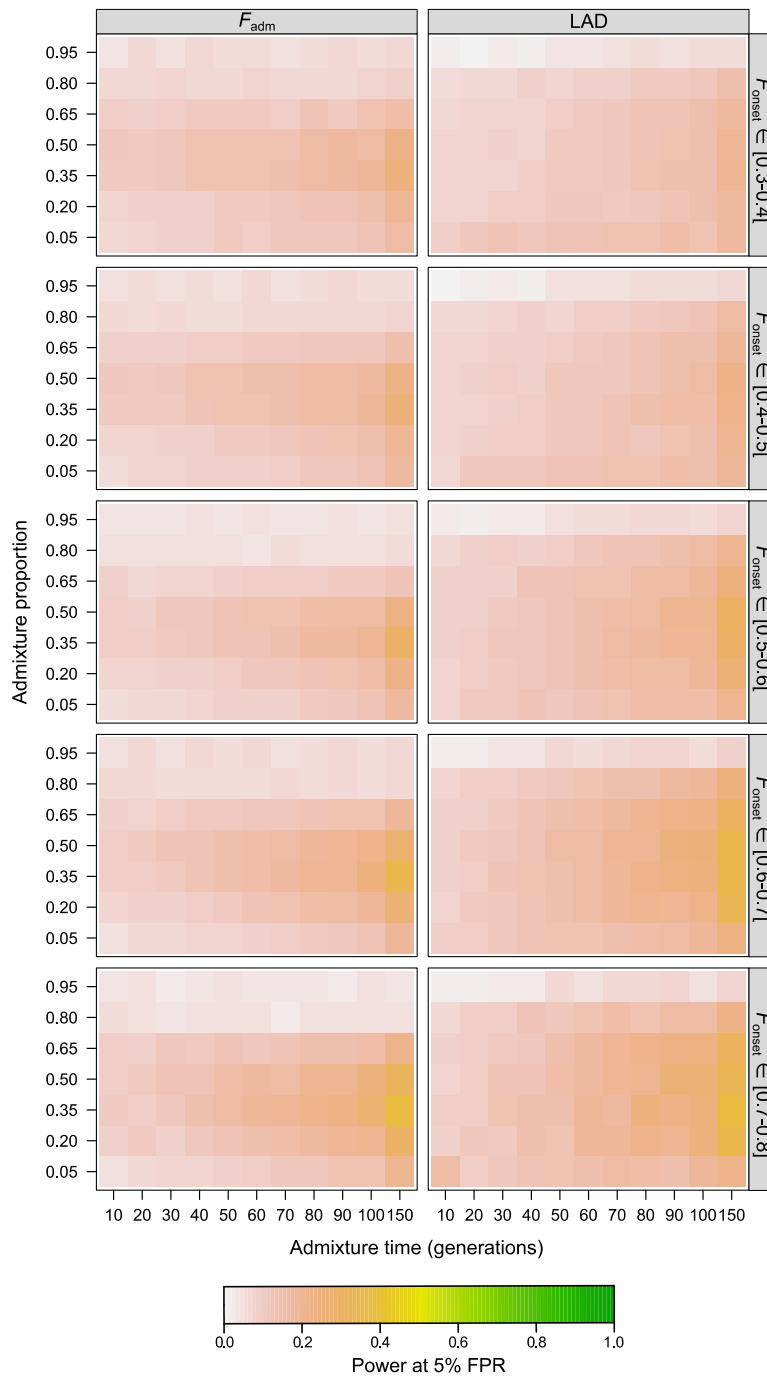

**Figure S9. Effects of the frequency of the beneficial mutation ( $s = 0.01$ ) on the power to detect adaptive admixture.**

Effects on the detection power of  $F_{adm}$  and LAD of admixture time  $T_{adm}$ , admixture proportion  $\alpha$  and  $F_{onset}$ , the frequency of the beneficial mutation in the source population at the time of admixture  $T_{adm}$ . Colour indicates average detection power for a FPR = 5% threshold, across combinations of the remaining parameters.

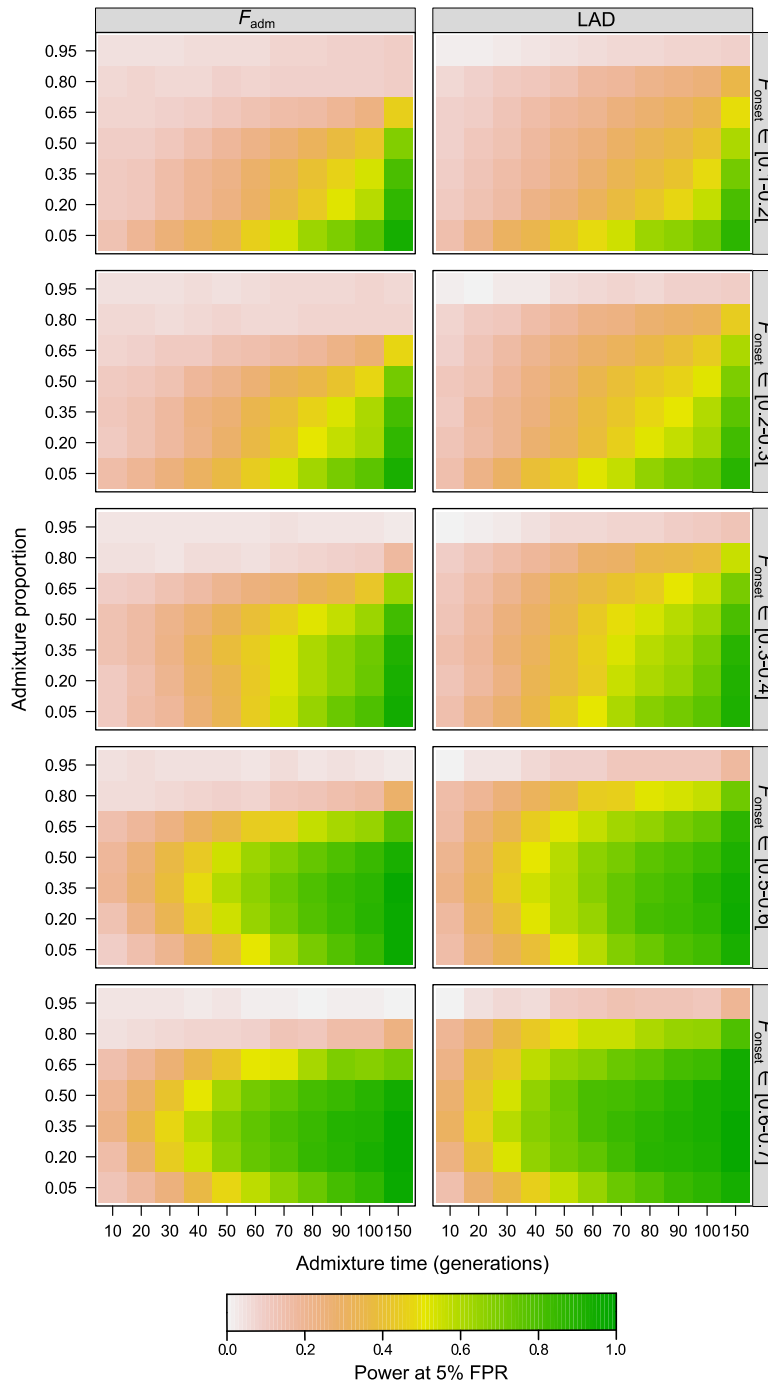

**Figure S10. Effects of the frequency of the beneficial mutation ( $s = 0.05$ ) on the power to detect adaptive admixture.**

Effects on the detection power of  $F_{adm}$  and LAD of admixture time  $T_{adm}$ , admixture proportion  $\alpha$  and  $F_{onset}$ , the frequency of the beneficial mutation in the source population at the time of admixture  $T_{adm}$ . Colour indicates average detection power for a FPR = 5% threshold, across combinations of the remaining parameters.

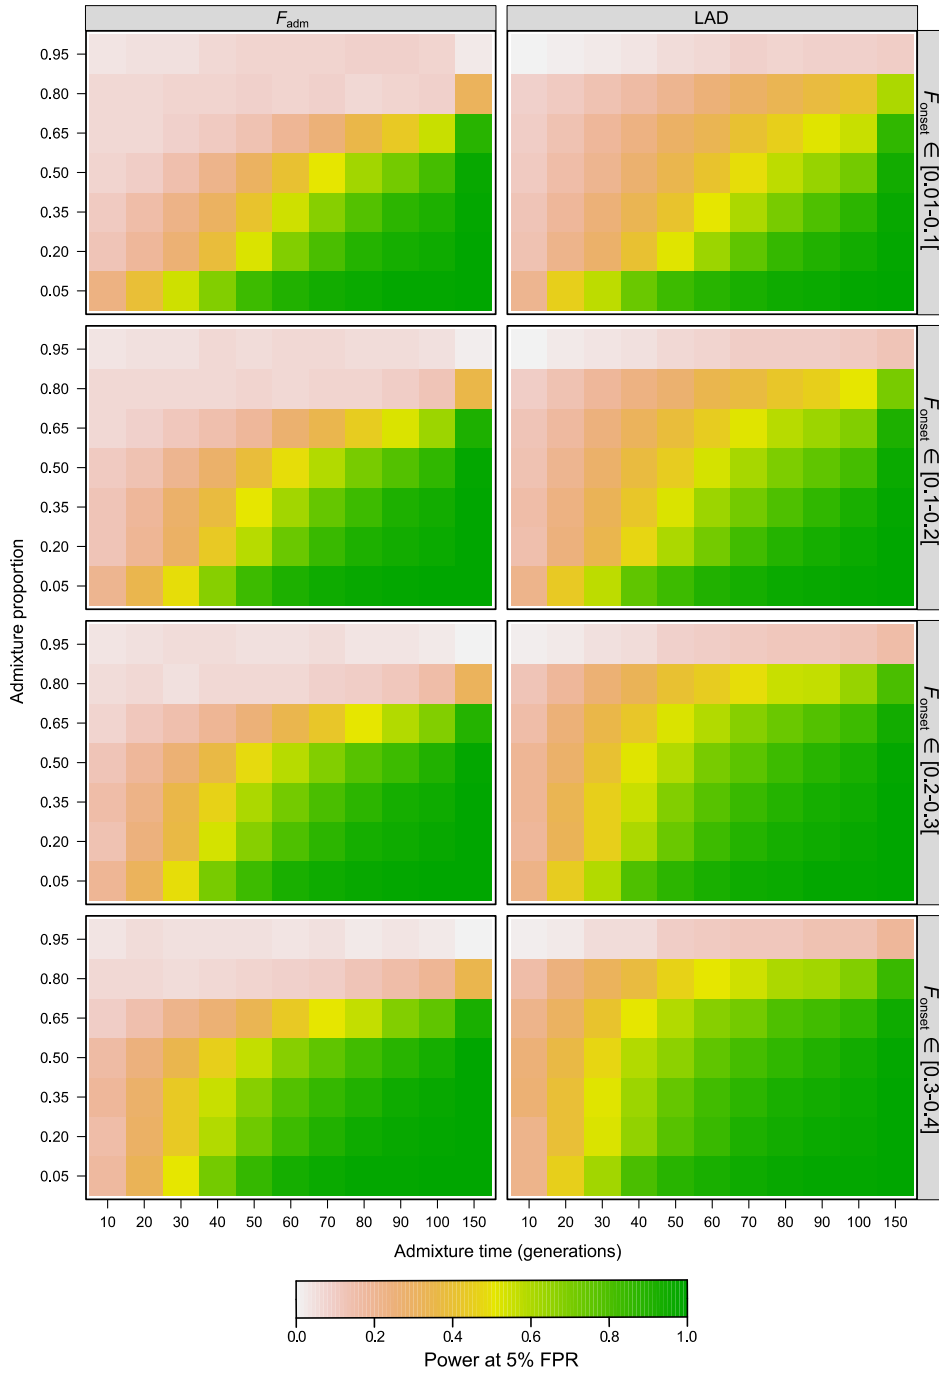

**Figure S11. Effects of the frequency of the beneficial mutation ( $s = 0.10$ ) on the power to detect adaptive admixture.**

Effects on the detection power of  $F_{adm}$  and LAD of admixture time  $T_{adm}$ , admixture proportion  $\alpha$  and  $F_{onset}$ , the frequency of the beneficial mutation in the source population at the time of admixture  $T_{adm}$ . Colour indicates average detection power for a FPR = 5% threshold, across combinations of the remaining parameters.



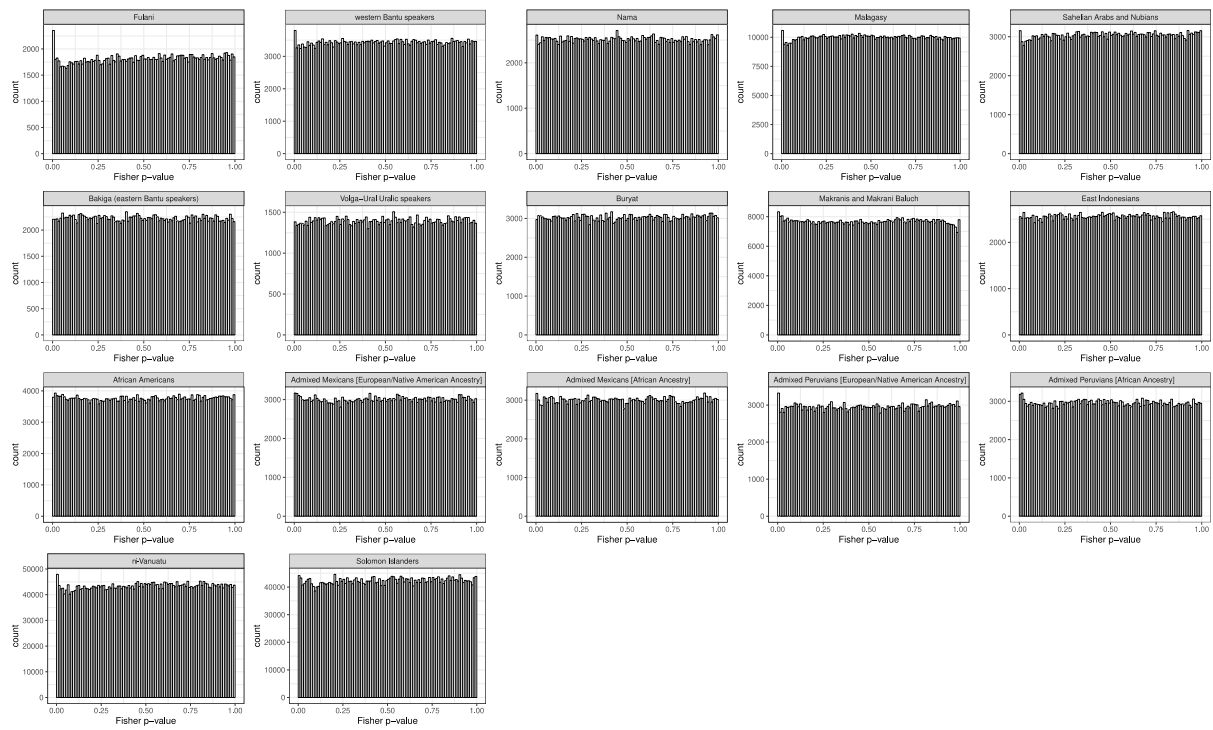

**Figure S12. Distributions of Fisher's combined  $P$ -values in the empirical data.**

Histograms of combined  $P$ -values using Fisher's method, for the 15 analysed admixed populations. The  $P$ -values are uniformly distributed, except for certain populations where there is an excess of small  $P$ -values, corresponding to the populations where signals for adaptive admixture were found.

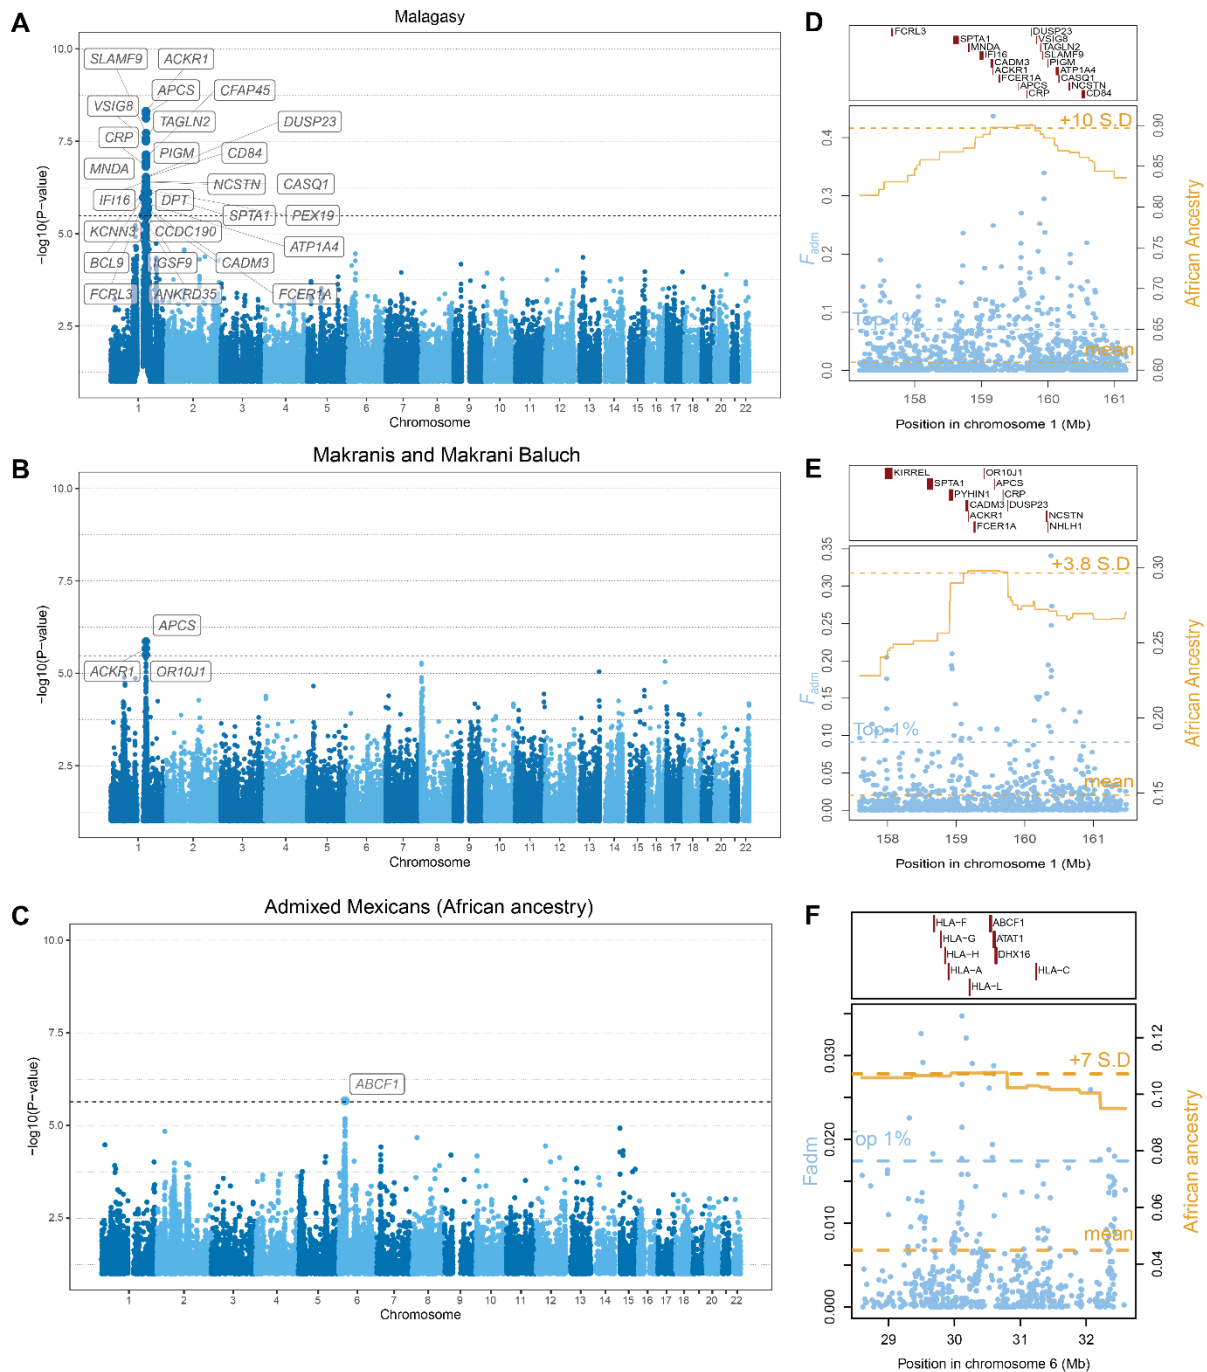

**Figure S13. Other previously reported genomic signals of adaptive admixture.**

(A) Genome-wide signals of adaptive admixture in Malagasy populations from Madagascar.

(B) Genome-wide signals of adaptive admixture in African-descent Makranis and Makrani Baluch from Pakistan.

(C) Genome-wide signals of adaptive admixture in admixed Mexicans (African ancestry).

(A-C) Highlighted blue points indicate variants that passed the Bonferroni significance threshold (shown by a horizontal dotted line). Gene labels were attributed based on the gene with the highest V2G score within 250-kb of the candidate variant.

(D) Local signatures of adaptive admixture for the *ACKR1* region in Malagasy from Madagascar.

(E) Local signatures of adaptive admixture for the *ACKR1* region in Makranis and Makrani Baluch from Pakistan.

(F) Local signatures of adaptive admixture for the *HLA* class I region in admixed Mexicans.

(D-F) Light blue points indicate  $F_{\text{adm}}$  values for individual variants. The gold solid line indicates the average African local ancestry.

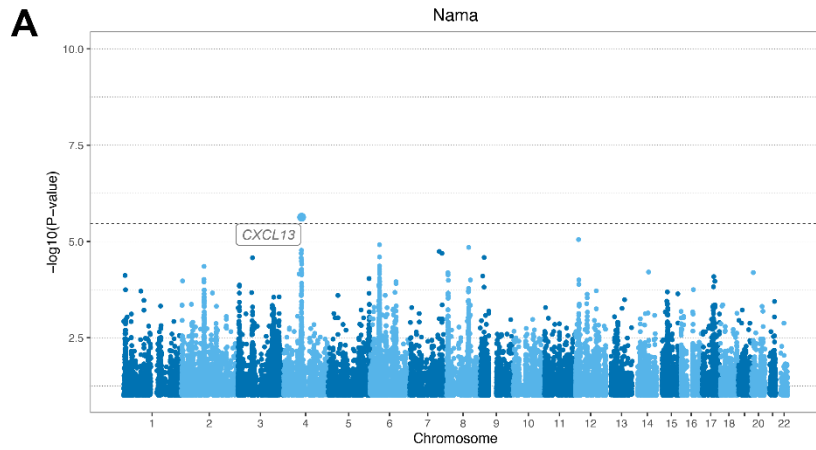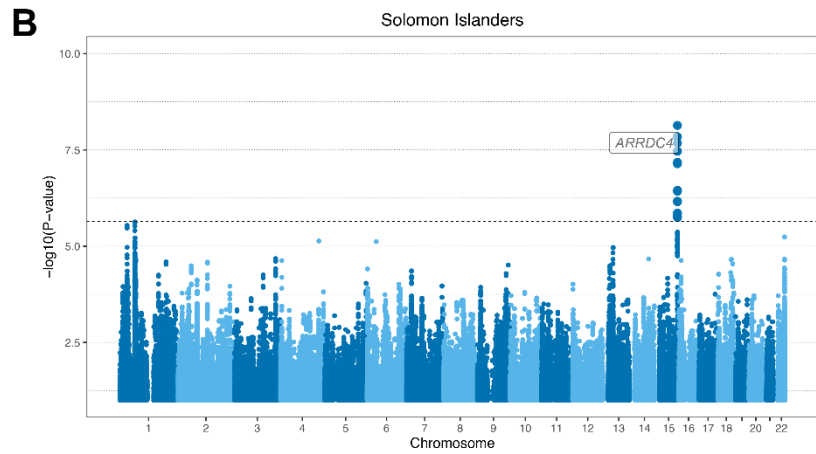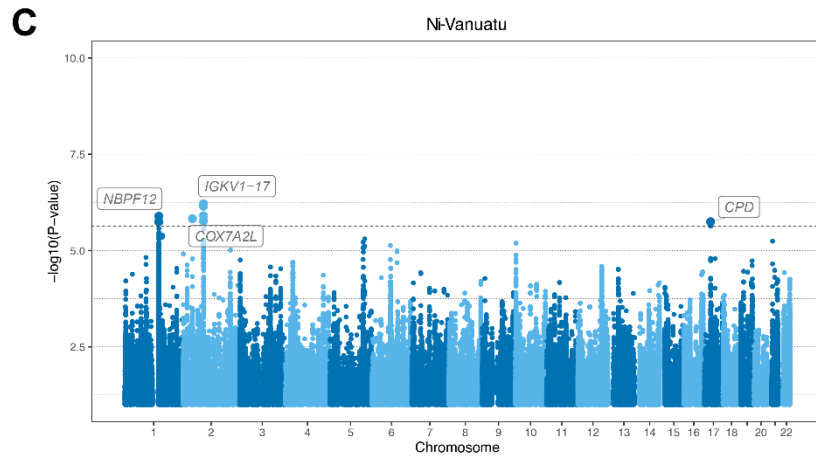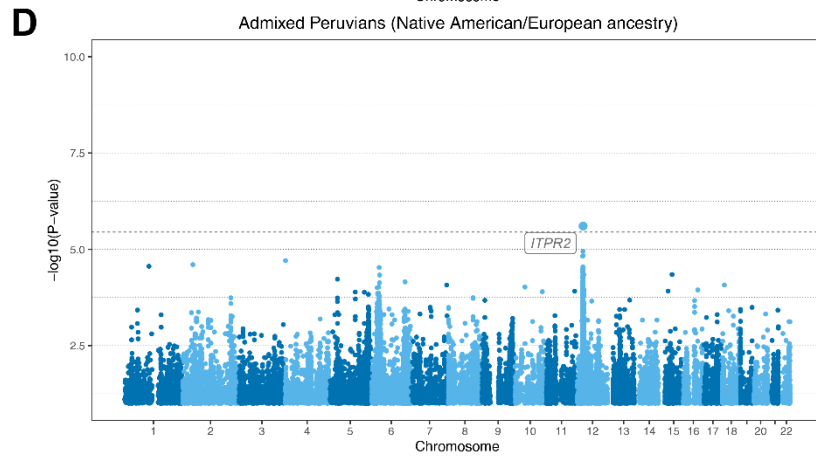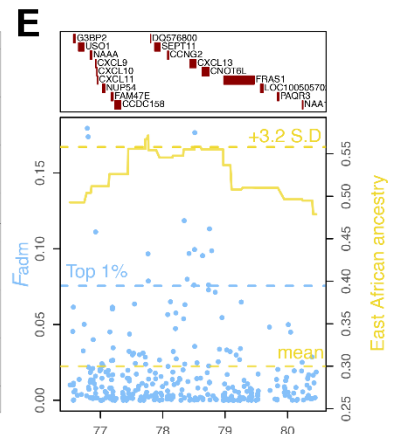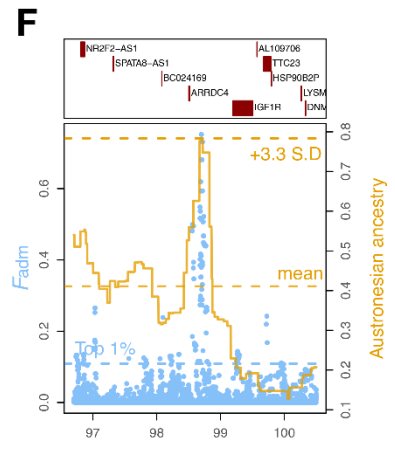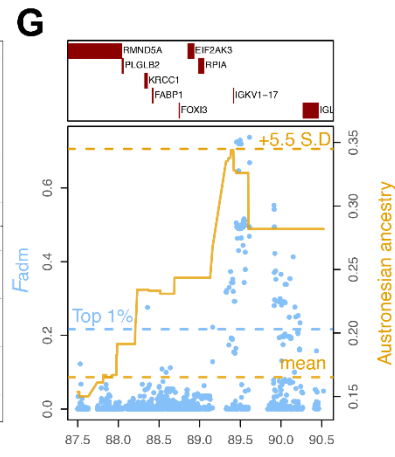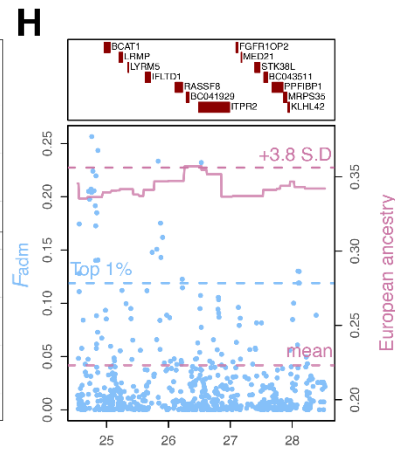

**Figure S14. Other novel genomic signals of adaptive admixture.**

(A) Genome-wide signals of adaptive admixture in the Nama from South Africa.

(B) Genome-wide signals of adaptive admixture in Solomon Islanders.

(C) Genome-wide signals of adaptive admixture in Vanuatu Islanders.

(D) Genome-wide signals of adaptive admixture in admixed Peruvians.

(A-D) Highlighted blue points indicate variants that passed the Bonferroni significance threshold (shown by a horizontal dotted line). Gene labels were attributed based on the gene with the highest V2G score within 250-kb of the candidate variant.

(E) Local signatures of adaptive admixture for the *CNOT6L/CXCL13* region in the Nama from South Africa.

(F) Local signatures of adaptive admixture for the *ARRDC4* region in Solomon Islanders.

(G) Local signatures of adaptive admixture for the *IGKVI-17* region in Vanuatu Islanders.

(H) Local signatures of adaptive admixture for the *ITPR2* region in admixed Peruvians.

(E-H) Light blue points indicate  $F_{adm}$  values for individual variants. The yellow, gold and pink solid lines indicate average local ancestry from East Africans, Austronesians and Europeans respectively.

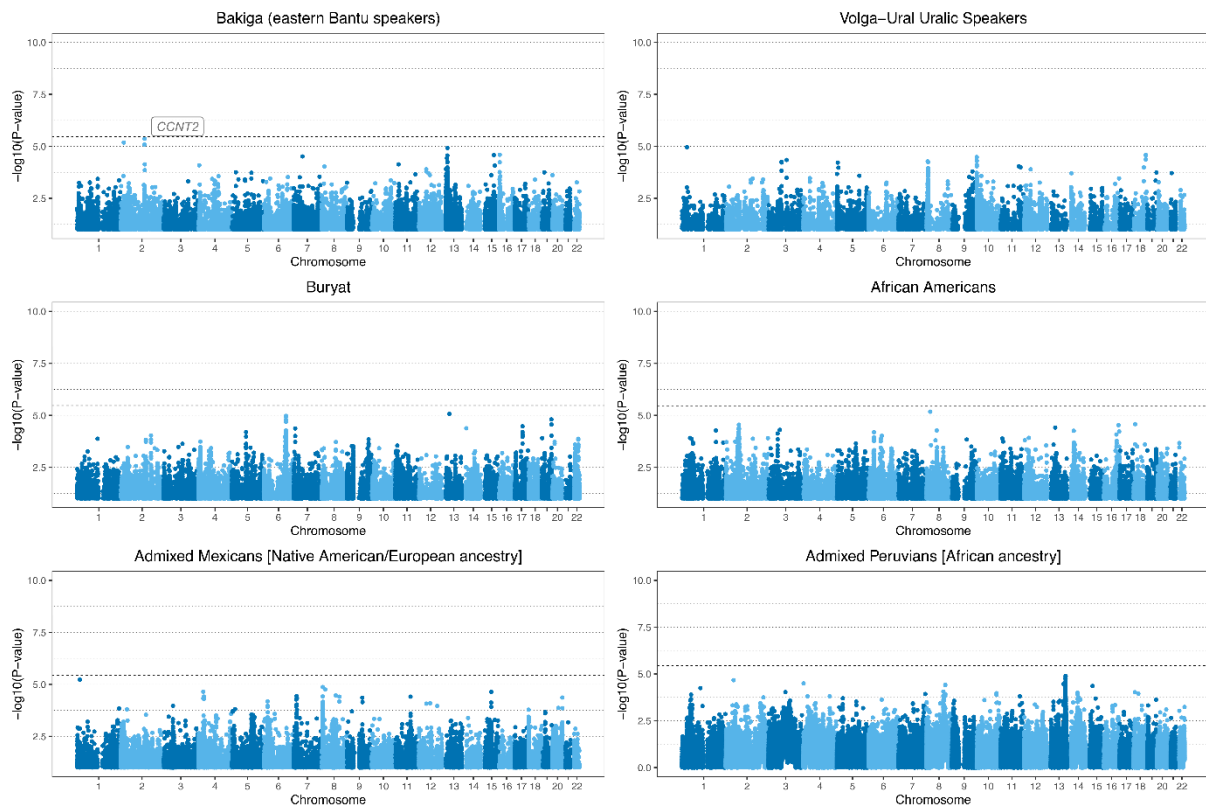

**Figure S15. Genome scans for populations where there is no evidence for adaptive admixture.**

Manhattan plots of  $-\log_{10}(P\text{-values})$  for the combined Fisher's method, in the remaining 6 admixed populations where no variant passes the Bonferroni significance threshold (shown by a horizontal dotted line).
